# Supplementary material for: Poor prognosis of child and adolescent musculoskeletal pain: a systematic literature review
Source: PubMed Central journal article supplement — BMJ Open. 2019 Jul 18;9(7):e024921. doi: 10.1136/bmjopen-2018-024921 (PMC6661566; doi:10.1136/bmjopen-2018-024921), 2019-07-18

# BMJ Open

BMJ Open is committed to open peer review. As part of this commitment we make the peer review history of every article we publish publicly available.

When an article is published we post the peer reviewers' comments and the authors' responses online. We also post the versions of the paper that were used during peer review. These are the versions that the peer review comments apply to.

The versions of the paper that follow are the versions that were submitted during the peer review process. They are not the versions of record or the final published versions. They should not be cited or distributed as the published version of this manuscript.

BMJ Open is an open access journal and the full, final, typeset and author-corrected version of record of the manuscript is available on our site with no access controls, subscription charges or pay-per-view fees (<http://bmjopen.bmj.com>).

If you have any questions on BMJ Open's open peer review process please email [info.bmjopen@bmj.com](mailto:info.bmjopen@bmj.com)

# BMJ Open

## Poor prognosis of child and adolescent Musculoskeletal Pain - a Systematic Literature Review

|                                                                                                                                                                                                             |                                                                                                                                                                                                                                                                                                                                                                                                                                                                                                                                                                                              |
|-------------------------------------------------------------------------------------------------------------------------------------------------------------------------------------------------------------|----------------------------------------------------------------------------------------------------------------------------------------------------------------------------------------------------------------------------------------------------------------------------------------------------------------------------------------------------------------------------------------------------------------------------------------------------------------------------------------------------------------------------------------------------------------------------------------------|
| Journal:                                                                                                                                                                                                    | <i>BMJ Open</i>                                                                                                                                                                                                                                                                                                                                                                                                                                                                                                                                                                              |
| Manuscript ID                                                                                                                                                                                               | bmjopen-2018-024921                                                                                                                                                                                                                                                                                                                                                                                                                                                                                                                                                                          |
| Article Type:                                                                                                                                                                                               | Research                                                                                                                                                                                                                                                                                                                                                                                                                                                                                                                                                                                     |
| Date Submitted by the Author:                                                                                                                                                                               | 14-Aug-2018                                                                                                                                                                                                                                                                                                                                                                                                                                                                                                                                                                                  |
| Complete List of Authors:                                                                                                                                                                                   | Pourbordbari, Negar; Research unit for general practice in Aalborg Denmark, Clinical medicine<br>Riis, Allan; Department of Clinical Medicine at Aalborg University, Research Unit for General Practice in Aalborg<br>Jensen, Martin; Department of Clinical Medicine at Aalborg University, Research Unit for General Practice in Aalborg<br>Olesen, Jens; Department of Clinical Medicine at Aalborg University, Research Unit for General Practice in Aalborg<br>Rathleff, Michael ; Department of Clinical Medicine at Aalborg University, Research Unit for General Practice in Aalborg |
| Keywords:                                                                                                                                                                                                   | musculoskeletal pain, adolescents, children, prognosis, general practice                                                                                                                                                                                                                                                                                                                                                                                                                                                                                                                     |
| <p>Note: The following files were submitted by the author for peer review, but cannot be converted to PDF. You must view these files (e.g. movies) online.</p> <p>Systematic-review-animation-final.mp4</p> |                                                                                                                                                                                                                                                                                                                                                                                                                                                                                                                                                                                              |

SCHOLARONE™  
Manuscripts

1  
2  
3  
4 **Poor prognosis of child and adolescent Musculoskeletal Pain -**  
5 **a Systematic Literature Review**  
6  
7  
8

9 **Authors**

10 Pourbordbari N<sup>1</sup>, Riis A<sup>1</sup>, Jensen MB<sup>1</sup>, Olesen JL<sup>1</sup>, Rathleff MS<sup>1</sup>  
11

12 **Affiliation:**

13 Research Unit for General Practice in Aalborg,  
14 Department of Clinical Medicine,  
15 Aalborg University,  
16 Denmark.  
17

18 **Authors and contact information**

19 Corresponding author Negar Pourbordbari MD,  
20 Research Unit for General Practice in Aalborg,  
21 Department of Clinical Medicine,  
22 Aalborg University,  
23 Denmark.  
24 Email: negar@dcm.aau.dk.  
25  
26  
27  
28  
29

30 **Word count: 2463**  
31  
32  
33  
34  
35  
36  
37  
38  
39  
40  
41  
42  
43  
44  
45  
46  
47  
48  
49  
50  
51  
52  
53  
54  
55  
56  
57  
58  
59  
60

**Abstract****Objectives**

To identify baseline patient characteristics that are: (i) associated with a poor outcome on follow up regardless of which treatment was provided (prognosis); or (ii) associated with a successful outcome to a specific treatment (treatment effect modifiers).

**Design**

Systematic literature review according to Preferred Reporting Items for Systematic Reviews and Meta-Analysis guidelines.

**Data sources**

Medline, Embase, Cinahl, Web of Science, Cochrane, SportDiscus, OT Seeker, and PsychInfo were searched for prospective cohort studies up to May 2017 without limitation in publication date.

**Eligibility criteria**

Prospective cohort studies reporting either prognostic factors or treatment effect modifiers on persistent musculoskeletal pain in 0- to 19-year-old children and adolescents.

**Outcome measures**

Our primary outcome was musculoskeletal pain at follow-up and identification of any baseline characteristics that were associated with this outcome (prognostic factors). No secondary outcomes were declared.

**Method**

Two reviewers independently screened abstracts and titles. We included prospective cohort studies that investigated the prognosis or treatment effect modifiers of 0- to 19-year-old children and adolescents with self-reported musculoskeletal pain. Risk of bias assessment was conducted with the QUIPS tool.

**Results**

Twenty-five studies yielding a total of 109 unique prognostic factors were included. Female sex and psychological symptoms were the most frequent investigated prognostic factors. Increasing age, generalised pain, longer pain duration, and smoking were other identified prognostic factors.

**Conclusion**

Several prognostic factors are associated with a poor prognosis in children and adolescents with musculoskeletal pain. These prognostic factors may help guide clinical practice and shared decision-making. None of the included studies was conducted within a general practice setting which highlights an area in need of research.

**Registration**

The protocol for this review was developed using the PRISMA-P 2015 statement, inspired by the Cochrane Central Register of Controlled Trials, and registered prospectively in the International Prospective Register of Systematic Reviews (PROSPERO, ID: CRD42016041378).

**Strengths and limitations of this study**

- No previous review has aimed to identify prognostic factors in children and adolescents with musculoskeletal pain with the purpose of informing clinical practice.
- In collaboration with a research librarian we developed a highly sensitive search for each of the eight databases to ensure an inclusion of the totality of previous research.
- Two reviewers independently carried out the screening and data extraction was executed in the same manner for all included studies.
- No meta-analysis was conducted due to a heterogeneity of patient population, setting, and endpoints.

**Keywords**

musculoskeletal pain; adolescents; children; prognosis; general practice

## Introduction

General practice is often the point of first contact into the health care system and musculoskeletal pain complaints are the most common cause of contact. The case workload due to musculoskeletal pain complaints in children and adolescents is estimated to be 4-8% of the UK general practice (1).

Musculoskeletal pain affects half of all children and adolescents, and increases exponentially in frequency around the age of 10 (2-6). A recent systematic review reported that 40% of an adolescent population had experienced pain during the past six months (3). The most common pain sites are the knee and back (7). Musculoskeletal pain has a detrimental impact on the adolescents' quality of life and may cause them to withdraw from school, social, and athletic activities (8, 9).

Musculoskeletal pain in children and adolescents has previously been considered a self-limiting condition without long-term impact (10). Recent cohort studies show that 16-32% of patients with knee pain still report knee pain one year later (10, 11) and that 21% of 12-35-year-olds had persistent knee pain six years after initial contact to their general practitioner (10). Collectively, these studies highlight that a significant proportion of adolescents will report pain even years later. Who are the children and adolescents with a particularly high risk of long-lasting musculoskeletal pain? This is one of the most common questions from our stakeholder interviews with general practitioners [*unpublished stakeholder event*].

Knowledge of prognostic factors can inform the general practitioner of the prognosis of their patients and enable them to identify those with a poor prognosis to stratify care, address modifiable risk factors and better understand chronic pain conditions. So far, no systematic reviews have aimed to inform clinical practice of prognostic factors in children, and adolescents with musculoskeletal pain. Therefore, we aimed to identify baseline patient characteristics associated with a (i) poor outcome on follow-up (prognosis) or (ii) successful outcome of a treatment (treatment effect modifiers).

## Methods

### Literature search

We searched in Medline, Embase, Cinahl, Web of Science, Cochrane, SportDiscus, OT Seeker, and PsychInfo from their inception until September 2017 without limitation on date. An experienced research librarian collaborated in the production of individual search strategies for each of the eight databases (Appendix 1).

### Eligibility criteria

#### **Study population and design**

We included prospective studies that investigated prognostic factors or treatment effect modifiers in children and adolescents 0- to 19-years-old, with any type and location of musculoskeletal pain. Musculoskeletal pain was defined as pain in muscle, tendon, bone, and joint (12). We included musculoskeletal pain types, reported in each of our included studies, without further definition of or changes in the designations chosen by the respective authors. We excluded pain knowingly caused by tumours, fractures, infections, systemic and neurological conditions, and stomach pain, because of insufficient differentiation between musculoskeletal stomach pain and stomach pain by other causes. Furthermore, we included all prospective studies, independent of intervention and randomised trials including all types of comparators. As expected, most studies did not use a comparator because they were prospective cohort studies. Similar to intervention, these studies were included independent of comparators. There were no restrictions on the type of setting or language.

#### **Review process**

Two reviewers (NP and AR) independently screened titles and abstracts for studies addressing the question: What are the prognostic factors and treatment effect modifiers for children and adolescents with musculoskeletal pain? Full-text articles were then screened, adding primary reasons for exclusion.

There was no blinding of the review authors to the journal titles, authors, or institutions. Reference lists of all included studies were screened for eligible publications that may have been missed during the initial search. The study selection process was finalised without any disagreements on included studies. EndNote was used to remove duplicates and NP manually checked for duplicates afterwards.

### Data extraction

Study details and results were extracted using a pre-defined data extraction form inspired by The Cochrane Collaboration (13). We extracted the prognostic factors from the included papers and used the following estimates: odds ratios (OR), relative risks (RR), and/or P-values. If possible, we extracted the adjusted associations.

### Outcomes and endpoints

Our primary outcome of interest was musculoskeletal pain at follow-up and identification of any baseline characteristics that were associated with this outcome (prognostic factors). We used the term “pain persistence” to describe participants who had pain at both baseline and follow-up, without applying restrictions on either pain measurement or on follow-up time points.

### Risk of bias

Risk of bias was assessed using the Quality in Prognostic Studies (QUIPS) tool (14). On the study level, NP and AR independently rated the 25 included studies and reached consensus on all risk of bias assessments (table 1). Prognostic factors from studies with a high risk of bias, were excluded from figure 3.

**Table 1** Risk of bias in included studies. With the Quality in Prognostic Studies (QUIPS) tool studies were assessed on the overall risk of bias within each of the six domains and rated as low, moderate or high risk of bias. Three studies were rated with high risk of bias, and hence excluded from the final results.

| Study author year      | Design                                               | Study participation | Study attrition | Prognostic factor measurement | Outcome measurement | Study confounding | Statistical analysis and presentation |
|------------------------|------------------------------------------------------|---------------------|-----------------|-------------------------------|---------------------|-------------------|---------------------------------------|
| Blauuw et al 2015      | Prospective cohort                                   | Low                 | Moderate        | Low                           | Low                 | Moderate          | Low                                   |
| Brattberg et al 1993   | Prospective cohort                                   | Moderate            | Moderate        | Low                           | Low                 | Moderate          | High                                  |
| Brattberg et al 2004   | Prospective cohort                                   | Low                 | Moderate        | Low                           | Low                 | Low               | Low                                   |
| El-Metwally et al 2004 | Prospective cohort                                   | Low                 | Low             | Low                           | Low                 | Low               | Low                                   |
| El-Metwally et al 2005 | Prospective cohort                                   | Low                 | Low             | Low                           | Low                 | Low               | Low                                   |
| Flato et al 1997       | Prospective cohort                                   | Low                 | Low             | Low                           | Low                 | Low               | Low                                   |
| Jones et al 2009       | Prospective cohort                                   | Low                 | Moderate        | Low                           | Low                 | Low               | Low                                   |
| Jussila et al 2014     | Prospective cohort                                   | Low                 | Moderate        | Low                           | Low                 | Low               | Low                                   |
| Laimi et al 2007       | Prospective cohort                                   | Low                 | Moderate        | Low                           | Low                 | Low               | Low                                   |
| Lunde et al 2015       | Prospective cohort                                   | Low                 | Moderate        | Low                           | Low                 | Low               | Low                                   |
| Mikkelsen et al 1997   | Prospective cohort                                   | Low                 | Low             | Low                           | Low                 | Moderate          | Moderate                              |
| Mikkelsen et al 1998   | Prospective cohort                                   | Low                 | Low             | Low                           | Low                 | Low               | Moderate                              |
| Mikkelsen et al 1999   | Prospective cohort                                   | Low                 | Low             | Low                           | Low                 | Low               | Low                                   |
| Mikkonen et al 2008    | Prospective cohort                                   | Low                 | Moderate        | Low                           | Low                 | Low               | Low                                   |
| Mikkonen et al 2012    | Prospective cohort                                   | Moderate            | Low             | Low                           | Low                 | Low               | Low                                   |
| Mikkonen et al 2013    | Prospective cohort                                   | Low                 | Moderate        | Low                           | Low                 | Low               | Low                                   |
| Paananen et al 2010    | Prospective cohort                                   | Low                 | Moderate        | Low                           | Low                 | Low               | Low                                   |
| Rathleff et al 2013    | Prospective cohort and nested case-control           | Moderate            | Low             | Low                           | Low                 | Low               | Low                                   |
| Rathleff et al 2016*   | Prospective cohort                                   | Low                 | Low             | Low                           | Low                 | Low               | Low                                   |
| Rathleff et al 2016    | Prospective cohort                                   | Low                 | Low             | Low                           | Low                 | Low               | Low                                   |
| Sjolie et al 2001      | Prospective cohort study with a cross sectional part | Low                 | Low             | Low                           | Low                 | Low               | Low                                   |
| Sperotto et al 2015    | Prospective cohort                                   | Low                 | Moderate        | Low                           | Low                 | High              | Moderate                              |
| Stanford et al 2007    | Prospective cohort                                   | Low                 | Moderate        | Low                           | Low                 | Low               | Low                                   |

|                  |                    |          |          |     |     |          |          |
|------------------|--------------------|----------|----------|-----|-----|----------|----------|
| Ståhl et al 2008 | Prospective cohort | Low      | Moderate | Low | Low | Moderate | Low      |
| Uziel et al 2010 | Prospective cohort | Moderate | Low      | Low | Low | High     | Moderate |

*\*Is knee pain during adolescence a self-limiting condition?*

**Risk of bias in included studies.** With the Quality in Prognostic Studies (QUIPS) tool studies were assessed on the overall risk of bias within each of the six domains and rated as low, moderate or high risk of bias. Three studies were rated with high risk of bias, and hence excluded from the final results

### **Involvement of general practitioners**

With stakeholder involvement and input from a panel of general practice researchers experienced in musculoskeletal research, we sub-grouped our identified prognostic factors in accordance with the biopsychosocial model (15, 16):

#### Biological prognostic factors:

- Female sex
- Older age
- Body measurement factors
- Physical functioning
- Pain characteristics

#### Psychological prognostic factors

- General psychological factors
- Depressive factors

#### Social prognostic factors:

- General social factors
- Sleep-related factors
- Physical activity/inactivity
- Alcohol
- Smoking

### **Reporting of results**

We were not able to conduct our a priori planned meta-analysis because of heterogeneity in terms of patient population, setting, and time points for follow-up. The evidence on included prognostic factors was reported with odds ratios (OR), relative risks (RR), and/or P-values. As OR and RR may differ in interpretation, we reported them separately. A statistically significant association between a patient characteristic and an outcome was defined as an RR or OR above or below 1 that did not include 1 in the 95% confidence interval. As for P-value, a statistically significant association was defined as  $P < 0.05$ . We used the PRISMA checklist when writing our report (17).

### **Patient involvement**

No patients or public were involved in the present study.

## **RESULTS**

### **Included studies**

Figure 1 reports the results of the search strategy. Of the 37,884 titles identified, 36,224 studies were screened, and 25 studies (9, 11, 16, 18-39) were included. All included studies were prospective studies. The included studies used a mix of different measures to capture pain at follow-up. Musculoskeletal pain types included in our search were: general musculoskeletal pain, neck, back, lower back, stomach, lower limb, knee, and growing pain. No treatment effect modifiers were identified.

### **Risk of bias**

The most common reasons for a moderate or high risk of bias were inadequately described study participation and statistical analyses (n=6, 23%), attrition rates (n=5, 20%), and poor adjustment for confounders (n=11, 42%).

### Prognosis

Figure 2 highlights the persistence of musculoskeletal pain in all included studies at different follow-up time points. On average, 54% with general musculoskeletal pain, 49% with knee pain and 42% with neck pain also reported pain at follow-up. A complete report of all the identified prognostic factors is listed in supplementary table 1. Figure 3 depicts the majority of these prognostic factors, stratified in pain type, sex, study population size, and follow-up (please see web supplemental document for explanatory notes).

Very few prognostic factors were reported on back pain, growing pain, lower limb pain, and widespread musculoskeletal pain (supplementary table 1); consequently, they were excluded from figure 3. Table 2 condenses the results from supplementary table 1 and highlights four prognostic factors on four different musculoskeletal pain types. Below each factor are suggestive questions to provide the general practitioner with insight into the patient's prognosis. Table 2 and figure 3 can be printed and used by a general

| Prognostic factors | General musculoskeletal pain                                                                                    | Low back pain                                                                                    | Neck pain                                                                                                                           | Knee pain                                                                                                 |
|--------------------|-----------------------------------------------------------------------------------------------------------------|--------------------------------------------------------------------------------------------------|-------------------------------------------------------------------------------------------------------------------------------------|-----------------------------------------------------------------------------------------------------------|
|                    | -Female sex and female smokers<br>-Day tiredness/fatigue<br>-Physical activity vs. none<br>-Depressive symptoms | -Higher lumbar mobility*<br>-Longer pain duration<br>-Peer problems<br>-Smoking                  | -Female sex<br>-Depressive symptoms<br>-Multisite pain vs. localized<br>-Day tiredness                                              | -Increasing age<br>-Daily pain<br>-Sport > 2t/week<br>-Low quality of life                                |
| Questions          | -Do you smoke?<br>-Do you get enough sleep?<br>-Do you do sport?<br>-Are you feeling mentally well?             | -Clinical examination<br>-How long have you had pain?<br>-Do you have friends?<br>-Do you smoke? | -Are you feeling mentally well?<br>-Do you have pain in more than one musculoskeletal region?<br>-Do you feel tired during the day? | -Do you experience daily pain<br>-Do you do practice sport frequently?<br>-Are you feeling mentally well? |

practitioner at time of initial consultation with a 0-19-year-old patient with musculoskeletal pain.

**Table 2** What to ask in clinical practice? 4 prognostic factors belonging to 4 frequent musculoskeletal pain types in general practice: General musculoskeletal-, Low back-, Neck-, and Knee Pain.

The questions are proposals towards assessment of prognosis on musculoskeletal pain.

\* to be evaluated by clinical examination

### Prognostic factors associated with pain at follow-up

A total of 109 prognostic factors were associated with musculoskeletal pain at follow-up, of which most were on general musculoskeletal pain and low back pain (table 3). Supplementary table 1 includes these results and further detailed depiction of prognostic factors.

**Table 3** Included studies described by musculoskeletal pain type, baseline age, size of study population, and follow-up.

| Study author (reference) | Musculoskeletal pain type | Baseline age (years) | Study population (n) | Follow-up (years) | Persistent pain at follow-up Female (%) | Persistent pain at follow-up Male (%) | Persistent pain at follow-up combined (%) |
|--------------------------|---------------------------|----------------------|----------------------|-------------------|-----------------------------------------|---------------------------------------|-------------------------------------------|
| Blaauw BA (18)           | Headache                  | 12 to 16             | 1586                 | 4                 | 45.7                                    | 22.7                                  | 35.1                                      |
| Brattberg G 93 (19)      | Back, Head                | 8, 11, 13            | 471                  | 2                 | Back 15, Head 40                        | Back 4, Head 20                       | Back 9.3, Head 30.7                       |
| Brattberg G 04 (20)      | General musculoskeletal   | 10, 13, 16           | 597                  | 11                | 59                                      | 39                                    | 20                                        |
| El-Metwally A 04 (21)    | General musculoskeletal   | 9 to 12              | 1756                 | 1 and 4           | 4 years: 56.2                           | 4 years: 43.8                         | 1 years: 53.8, 4 years: 63.5              |
| El-Metwally A 05 (11)    | Lower limb                | 9 to 12              | 1756                 | 1 and 4           | 1 year: 29.4, 4 years 31.9              | 1 year 55.8, 4 years 48.6             | 1 year: 32, 4 years 31                    |
| Flato B (22)             | General musculoskeletal   | 2 to 17              | 37                   | 9                 | 13                                      | N/A                                   | 59                                        |
| Jones GT (23)            | Low back                  | 11 to 14             | 330                  | 4                 | N/A                                     | N/A                                   | 26                                        |
| Jussila L (24)           | General musculoskeletal   | 16 to 18             | 1773                 | 2                 | N/A                                     | N/A                                   | N/A                                       |



|                     |                            |          |                   |          |                        |                        |                                                 |
|---------------------|----------------------------|----------|-------------------|----------|------------------------|------------------------|-------------------------------------------------|
| Laimi K (25)        | Headache <sup>a</sup>      | 13       | 311               | 3        | 54                     | 70.5                   | 48                                              |
| Lunde LK (26)       | Low back                   | 15 to 19 | 420               | 6.5      | N/A                    | N/A                    | 39                                              |
| Mikkelsen M 97 (27) | Neck, Widespread, low back | 9 to 12  | 1756              | 1        | N/A                    | N/A                    | Neck 48.3, WSP <sup>b</sup> 29.7, Low back 34.4 |
| Mikkelsen M 98 (28) | General musculoskeletal    | 9 to 12  | 1756              | 1        | N/A                    | N/A                    | 52.9                                            |
| Mikkelsen M 99 (29) | Neck, Widespread           | 9 to 12  | 464               | 1        | Neck 70.4, WSP 62.5    | Neck 41, WSP 62.5      | Neck 29, WSP 28.6                               |
| Mikkonen P 08 (30)  | Low back                   | 16       | 2969              | 2        | N/A                    | N/A                    | 27.1                                            |
| Mikkonen P 11 (31)  | Low back                   | 16       | 728               | 2        | 53                     | 46                     | 50.4                                            |
| Mikkonen P 13 (32)  | Low back                   | 7 to 19  | 1660              | 2 and 3  | 2 years 68, 3 years 63 | 2 years 62, 3 years 47 | N/A                                             |
| Paananen MV (33)    | General musculoskeletal    | 16       | 1594              | 2        | N/A                    | 75                     | 88                                              |
| Rathleff CR (9)     | Knee                       | 12 to 15 | 768               | 1        | N/A                    | N/A                    | 48.8                                            |
| Rathleff MS 16 (34) | Knee                       | 16 to 18 | 504               | 2        | N/A                    | N/A                    | 55.9                                            |
| Rathleff MS 16 (35) | Knee (PFP)                 | 15 to 19 | 121               | 3 months | N/A                    | N/A                    | 74.4                                            |
| Sjolie AN (36)      | Low back                   | 14 to 16 | 88                | 3        | N/A                    | N/A                    | 39                                              |
| Sperotto F (37)     | General musculoskeletal    | 8 to 13  | 289               | 3        | N/A                    | N/A                    | 54.3                                            |
| Stanford EA (39)    | Head, Back, Stomachache    | 10 to 11 | 2488 <sup>c</sup> | 2        | N/A                    | N/A                    | Head 29, Back 21.7                              |
| Ståhl M (38)        | Neck                       | 9 to 12  | 1756              | 1 and 4  | N/A                    | N/A                    | 1 year: 48.2, 4 years: 33.5                     |
| Uziel Y (40)        | Growing pain               | 10 to 16 | 35                | 5        | N/A                    | N/A                    | 48.6                                            |

N/A = not applicable

A = Headache: non migrainous

b = Widespread pain

c = included stomachache participants

**Extracted data from the Included studies were all musculoskeletal pain types investigated in the individual included studies together with baseline age, size of study population, follow-up and percentage of study participants who represented persistent pain at follow-up, -both stratified by gender and combined.**

Female sex was the most frequently identified prognostic factor associated with musculoskeletal pain at follow-up. Eleven studies identified psychological factors (e.g. depression, anxiety, and low self-esteem) to be associated with pain at follow-up in seven out of nine musculoskeletal pain types (9, 16, 18, 20, 21, 23, 24, 28, 33, 34, 38).

Longer pain duration was associated with pain at follow-up across four musculoskeletal pain types: musculoskeletal, low back, knee, and back pain (20, 22, 23, 34).

Five studies identified sleep-related problems associated with outcome (21, 24, 28, 33, 38).

Other indicators for musculoskeletal pain at follow-up were increasing age (9, 21, 25, 28), smoking (30, 33), parental pain (16, 22, 39), and multisite pain (21, 22, 38).

Figure 3 summarises all identified prognostic factors for musculoskeletal pain at follow-up, stratified in pain type, study population size, sex, and follow-up.

### Non-significant prognostic factors

We identified a total of 134 patient characteristics across nine musculoskeletal pain types and different follow-up time points with a non-significant association with musculoskeletal pain at follow-up (supplementary table 1).

Increasing age (11, 20, 22, 27, 29, 34, 39, 40) was the most frequently identified baseline factor with a non-significant association to musculoskeletal pain at follow-up. Multiple studies reported non-significant evidence on higher body mass index (22, 24, 40) and hypermobility (11, 28, 38).

## DISCUSSION

### Principal findings

Female sex was consistently associated with an increased risk of pain at follow-up across six different musculoskeletal pain types. Depressive symptoms (9, 16, 18, 21, 24, 28, 33, 34, 38), sleep-related factors (21, 24, 28, 33, 38), and parental pain condition (16, 22, 39) were all associated with a higher risk of pain at follow-up. Collectively, the identified studies included prognostic factors across all aspects of the

1  
2  
3  
4 biopsychosocial model, despite a main focus on biological factors. Increasing age was identified as both a  
5 significant and a non-significant prognostic factor in the included studies. This conflicting finding reflects  
6 the uncertainty surrounding the importance of age as a prognostic factor.

### 7 8 **Strengths and limitations in comparison with existing literature**

9 The latest systematic review on prognostic factors for children and adolescents with musculoskeletal pain  
10 ended their search in July 2015 which makes for a timely update (41). In addition to adding newer studies,  
11 our review differs from the previous with search in more databases, no restriction on publication language,  
12 and no restriction on pain duration (41). Despite methodology differences, we did not identify additional  
13 studies from inception to 2015, but identified two new studies from January 2016 to 2017. These studies  
14 added important knowledge of female sex, pain frequency, and the prognosis of knee pain. Thereby,  
15 supporting the previous research. Despite the commonality of children and adolescents with musculoskeletal  
16 pain in general practice (6), we did not identify a single study with a population of children or adolescents  
17 recruited from general practice.

18 A previous review on prognostic factors for adults with musculoskeletal pain in primary care was published  
19 in 2017 (42) with findings similar to ours i.e., female gender, older age, depression/anxiety, and long pain  
20 duration was found associated with an increased risk of musculoskeletal pain at follow-up. This suggest that  
21 some of the prognostic factors function well across the age range and their use is not isolated to specific age  
22 groups.

### 23 24 **Explanation of findings and implications for clinical practice**

25 Our findings suggest that females are at higher risk of persistent pain. Previous research highlights potential  
26 sex differences in pain responses by assessing pain intensity and threshold and conclude that females display  
27 greater sensitivity to multiple pain modalities compared with males (43). Importantly, pain-coping strategies  
28 have been found to differ between the sexes (44, 45). Females make use of social support, cognitive  
29 reinterperatation, and positive self-statements, while males use behavioural distraction and problem-focused  
30 tactics to manage pain. This could partly explain the sex-difference in prognosis and may open new  
31 opportunities for targeted treatment to improve long-term outcomes of young females with musculoskeletal  
32 pain.

33 The current results point towards both modifiable (psychological factors, smoking, and peer problems) and  
34 non-modifiable (sex, age, and pain duration) factors associated with prognosis. Despite time constraints in  
35 general practice, most of these factors can be extracted from electronic stored patient data, psychometric  
36 tests, and examination in a clinical general practice setting.

37 By asking your patient a few questions at the first consultation of musculoskeletal pain, the general  
38 practitioner may improve their understanding of their patients' risk of pain in the future. In the case of a  
39 present, baseline factor with a poor prognosis e.g. smoking among low back pain patients, the general  
40 practitioner now both has a scientific reason for and the clinical tool to modulate this factor. By prescribing  
41 cessation of smoking, thus, making an effort to improve the outcome for this patient.

42 Treatment of musculoskeletal pain requires the general practitioner to apply a multifactorial rather than a  
43 single-factor approach, hence, including the entire person and their life-circumstances when treating patients  
44 with pain (15, 46, 47). Clinicians must be aware of the multifactorial aetiology and consider biological-,  
45 psychological-, and social factors of musculoskeletal pain when addressing patient's coping behaviour and  
46 cognitive appraisal (48).

### 47 48 **Implications for future research**

49 Most of our included studies investigated biological prognostic factors (52 factors). Fewer investigated social  
50 (35 factors) and even fewer psychological prognostic factors (22 factors). Future research should include the  
51 entire patient, in terms of biological, psychological, and social-related components and aim to study these  
52 prognostic factors in a general practice setting. There is a dearth of knowledge of how psycho-social factors  
53 are associated with prognosis and how general practitioners can harness this information to tailor treatment  
54 and information to their patients. Despite the potential importance of pain, "who" the patient is should not be  
55 discounted. Geographical location of home, parental -pain, -profession and -income, and social identity in  
56  
57  
58  
59

1  
2  
3  
4 terms of cultural differences, religious beliefs, and relations could be important because we know from the  
5 biopsychosocial model that social background is important in relation to pain coping.

6 Only one study did follow-up after 4, 6.5, 9, and 11 years, respectively, which highlights the lack of long-  
7 term cohort studies on prognosis and impact of musculoskeletal pain in youth.

8 Almost one in every two children and adolescents still reported pain even years later (10, 11, 49). This  
9 highlights the importance of prognosis of pain in children and adolescents. Health care practitioners should  
10 be cognisant not to assume that musculoskeletal pain during childhood or adolescence is transient or self-  
11 limiting.

### 12 13 **Supplementary information**

14 Additional information accompanies this paper in the form of Appendix 1: Search string, Appendix 2:  
15 Completed PRISMA checklist, Appendix 3: Protocol, Figure 1: PRISMA Flow chart, Figure 2: Persistent  
16 musculoskeletal pain, stratified in pain type and follow-up, Figure 3: Prognostic factors for persistent  
17 musculoskeletal pain, according to pain type, population size, sex, follow-up, and the biopsychosocial  
18 model, Supplementary table 1: Estimates on prognostic factors specified according to musculoskeletal pain  
19 type, baseline age, and follow-up in the included studies, and an animation showing how our findings can be  
20 used in a clinical setting, go to: <https://youtu.be/raltzsgkTHc>

### 21 22 **Author contributions**

23 NP conducted the systematic literature search. NP and AR independently carried out the screening, study  
24 inclusion, and study bias assessment. NP and MSR led writing of both the protocol and manuscript and all  
25 authors contributed with important reflections and revisions to both.

### 26 27 **Funding**

28 This work was supported by The Research Unit for General Practice in Aalborg, Denmark, without any  
29 further funders.

### 30 31 **Ethical approval**

32 Not applicable.

### 33 34 **Competing interests**

35 The authors have declared no competing interests.

### 36 37 **Data sharing statement**

38 All data and results presented within this systematic review can be obtained, on reasonable request, by  
39 contacting the corresponding author.

## References

1. Michaleff ZA, Campbell P, Protheroe J, Rajani A, Dunn KM. Consultation patterns of children and adolescents with knee pain in UK general practice: analysis of medical records. *BMC Musculoskelet Disord*. 2017;18(1):239.
2. Hofel L, Draheim N, Hafner R, Haas JP. Pain syndrome of the musculoskeletal system in children and adolescents. *Zeitschrift Fur Rheumatologie*. 2016;75(3):292-301.
3. King S, Chambers CT, Huguet A, MacNevin RC, McGrath PJ, Parker L, et al. The epidemiology of chronic pain in children and adolescents revisited: a systematic review. *Pain*. 2011;152(12):2729-38.
4. Auvinen JP, Paananen MVJ, Tammelin TH, Taimela SP, Mutanen POA, Zitting PJ, et al. Musculoskeletal pain combinations in adolescents. *Spine*. 2009;34(11):1192-7.
5. De Inocencio J. Epidemiology of musculoskeletal pain in primary care. *Arch Dis Child*. 2004;89(5):431-4.
6. Michaleff ZA, Kamper SJ, Stinson JN, Hestbaek L, Williams CM, Campbell P, et al. Measuring Musculoskeletal Pain in Infants, Children, and Adolescents. *J Orthop Sports Phys Ther*. 2017;47(10):712-30.
7. Smedbraten BK, Natvig B, Rutle O, Bruusgaard D. Self-reported bodily pain in schoolchildren. *Scand J Rheumatol*. 1998;27(4):273-6.
8. McGrath P. Psychological guidelines for helping children cope with chronic benign intractable pain. *The Clinical journal of pain*. 1986.
9. Rathleff CR, Olesen JL, Roos EM, Rasmussen S, Rathleff MS. Half of 12-15-year-olds with knee pain still have pain after one year. *Danish Medical Journal*. 2013;60 (11) (no pagination)(A4725).
10. Kastelein M, Luijsterburg PA, Heintjes EM, van Middelkoop M, Verhaar JA, Koes BW, et al. The 6-year trajectory of non-traumatic knee symptoms (including patellofemoral pain) in adolescents and young adults in general practice: a study of clinical predictors. *British journal of sports medicine*. 2015;49(6):400-5.
11. El-Metwally A, Salminen JJ, Auvinen A, Kautiainen H, Mikkelsen M. Lower limb pain in a preadolescent population: prognosis and risk factors for chronicity--a prospective 1- and 4-year follow-up study. *Pediatrics*. 2005;116(3):673-81.
12. iasp. Acute Musculoskeletal Pain [Available from: [https://www.iasp-pain.org/files/Content/ContentFolders/GlobalYearAgainstPain2/MusculoskeletalPainFactSheets/AcutePain\\_Final.pdf](https://www.iasp-pain.org/files/Content/ContentFolders/GlobalYearAgainstPain2/MusculoskeletalPainFactSheets/AcutePain_Final.pdf)].
13. Cochrane Training. Data collection form for intervention reviews 2014 [Available from: <http://training.cochrane.org/resource/data-collection-forms-intervention-reviews>].
14. Hayden JA, van der Windt DA, Cartwright JL, Cote P, Bombardier C. Assessing bias in studies of prognostic factors. *Ann Intern Med*. 2013;158(4):280-6.
15. Engel GL. The Need for a New Medical Model: A Challenge for Biomedicine Science 1977;196(No. 4286):19-136.
16. Stanford EA, Chambers CT, Biesanz JC, Chen E. The frequency, trajectories and predictors of adolescent recurrent pain: A population-based approach. *Pain*. 2008;138(1):11-21.
17. Moher D, Shamseer L, Clarke M, Ghersi D, Liberati A, Petticrew M, et al. Preferred reporting items for systematic review and meta-analysis protocols (PRISMA-P) 2015 statement. *Syst Rev*. 2015;4:1.

18. Blaauw BA, Dyb G, Hagen K, Holmen TL, Linde M, Wentzel-Larsen T, et al. The relationship of anxiety, depression and behavioral problems with recurrent headache in late adolescence - a Young-HUNT follow-up study. *Journal of Headache and Pain*. 2015;16(1):1-7.
19. Brattberg G. Back pain and headache in Swedish schoolchildren: A longitudinal study. *Pain Clinic*. 1993;6(3):157-62.
20. Brattberg G. Do pain problems in young school children persist into early adulthood? A 13-year follow-up. *European Journal of Pain*. 2004;8(3):187-99.
21. El-Metwally A, Salminen JJ, Auvinen A, Kautiainen H, Mikkelsen M. Prognosis of non-specific musculoskeletal pain in preadolescents: A prospective 4-year follow-up study till adolescence. *Pain*. 2004;110(3):550-9.
22. Flato B, Aasland A, Vandvik IH, Forre O. Outcome and predictive factors in children with chronic idiopathic musculoskeletal pain. *Clinical and Experimental Rheumatology*. 1997;15(5):569-77.
23. Jones GT, Macfarlane GJ. Predicting persistent low back pain in schoolchildren: A prospective cohort study. *Arthritis Care and Research*. 2009;61(10):1359-66.
24. Jussila L, Paananen M, Nayha S, Taimela S, Tammelin T, Auvinen J, et al. Psychosocial and lifestyle correlates of musculoskeletal pain patterns in adolescence: A 2-year follow-up study. *European Journal of Pain (United Kingdom)*. 2014;18(1):139-46.
25. Laimi K, Vahlberg T, Salminen JJ, Metsahonkala L, Mikkelsen M, Anttila P, et al. Does neck pain determine the outcome of adolescent headache? *Cephalalgia*. 2007;27(3):244-53.
26. Lunde LK, Koch M, Hanvold TN, Waersted M, Veiersted KB. Low back pain and physical activity - A 6.5 year follow-up among young adults in their transition from school to working life. *Bmc Public Health*. 2015;15.
27. Mikkelsen M, Salminen JJ, Kautiainen H. Non-specific musculoskeletal pain in preadolescents. Prevalence and 1-year persistence. *Pain*. 1997;73(1):29-35.
28. Mikkelsen M, Salminen JJ, Sourander A, Kautiainen H. Contributing factors to the persistence of musculoskeletal pain in preadolescents: A prospective 1-year follow-up study. *Pain*. 1998;77(1):67-72.
29. Mikkelsen M, Sourander A, Salminen JJ, Kautiainen H, Piha J. Widespread pain and neck pain in schoolchildren. A prospective one-year follow-up study. *Acta Paediatrica, International Journal of Paediatrics*. 1999;88(10):1119-24.
30. Mikkonen P, Leino-Arjas P, Remes J, Zitting P, Taimela S, Karppinen J. Is smoking a risk factor for low back pain in adolescents? A prospective cohort study. *Spine*. 2008;33(5):527-32.
31. Mikkonen P, Viikari-Juntura E, Remes J, Pienimäki T, Solovieva S, Taimela S, et al. Physical workload and risk of low back pain in adolescence. *Occupational and Environmental Medicine*. 2011.
32. Mikkonen PH, Laitinen J, Remes J, Tammelin T, Taimela S, Kaikkonen K, et al. Association between overweight and low back pain: A population-based prospective cohort study of adolescents. *Spine*. 2013;38(12):1026-33.
33. Paananen MV, Taimela SP, Auvinen JP, Tammelin TH, Kantomaa MT, Ebeling HE, et al. Risk factors for persistence of multiple musculoskeletal pains in adolescence: A 2-year follow-up study. *European Journal of Pain*. 2010;14(10):1026-32.
34. Rathleff MS, Rathleff CR, Olesen JL, Rasmussen S, Roos EM. Is Knee Pain During Adolescence a Self-limiting Condition? Prognosis of Patellofemoral Pain and Other Types of Knee Pain. *American Journal of Sports Medicine*. 2016;44(5):1165-71.

- 1  
2  
3  
4 35. Rathleff MS, Roos EM, Olesen JL, Rasmussen S, Arendt-Nielsen L. Self-reported recovery is  
5 associated with improvement in localized hyperalgesia among adolescent females with  
6 patellofemoral pain: Results from a cluster randomized trial. *Clinical Journal of Pain*.  
7 2016;32(5):428-34.  
8  
9 36. Sjolie AN, Ljunggren AE. The significance of high lumbar mobility and low lumbar strength  
10 for current and future low back pain in adolescents. *Spine*. 2001;26(23):2629-36.  
11 37. Sperotto F, Brachi S, Vittadello F, Zulian F. Musculoskeletal pain in schoolchildren across  
12 puberty: A 3-year follow-up study. *Pediatric Rheumatology*. 2015.  
13 38. Stahl M, Kautiainen H, El-Metwally A, Hakkinen A, Ylinen J, Salminen JJ, et al. Non-specific  
14 neck pain in schoolchildren: Prognosis and risk factors for occurrence and persistence. A 4-year  
15 follow-up study. *Pain*. 2008;137(2):316-22.  
16 39. Uziel Y, Chapnick G, Jaber L, Nemet D, Hashkes PJ. Five-Year Outcome of Children With  
17 "Growing Pains": Correlations With Pain Threshold. *Journal of Pediatrics*. 2010;156(5):838-40.  
18 40. Lunde LK, Koch M, Hanvold TN, Waersted M, Veiersted KB. Low back pain and physical  
19 activity--A 6.5 year follow-up among young adults in their transition from school to working life.  
20 *BMC public health*. 2015;15:1115.  
21 41. Huguet A, Tougas ME, Hayden J, McGrath PJ, Stinson JN, Chambers CT. Systematic review  
22 with meta-analysis of childhood and adolescent risk and prognostic factors for musculoskeletal  
23 pain. *Pain*. 2016;157(12):2640-56.  
24 42. Artus M, Campbell P, Mallen CD, Dunn KM, van der Windt DA. Generic prognostic factors  
25 for musculoskeletal pain in primary care: a systematic review. *BMJ Open*. 2017;7(1):e012901.  
26 43. Bartley EJ, Fillingim RB. Sex differences in pain: a brief review of clinical and experimental  
27 findings. *British journal of anaesthesia*. 2013;111(1):52-8.  
28 44. Fillingim RB, King CD, Ribeiro-Dasilva MC, Rahim-Williams B, Riley JL, 3rd. Sex, gender, and  
29 pain: a review of recent clinical and experimental findings. *The journal of pain : official journal of*  
30 *the American Pain Society*. 2009;10(5):447-85.  
31 45. Racine M, Tousignant-Laflamme Y, Kloda LA, Dion D, Dupuis G, Choiniere M. A systematic  
32 literature review of 10 years of research on sex/gender and pain perception - part 2: do  
33 biopsychosocial factors alter pain sensitivity differently in women and men? *Pain*.  
34 2012;153(3):619-35.  
35 46. Polatin P, Bevers K, Gatchel RJ. Pharmacological treatment of depression in geriatric  
36 chronic pain patients: a biopsychosocial approach integrating functional restoration. *Expert Rev*  
37 *Clin Pharmacol*. 2017;10(9):957-63.  
38 47. Amiri RS, Jouibari MF, Nejat F, El Khashab M. Iniencephaly: Clinical, Radiological and  
39 Surgical Findings. *Pediatric Neurosurgery*. 2010;46(4):290-3.  
40 48. Gatchel RJ, Peng YB, Peters ML, Fuchs PN, Turk DC. The biopsychosocial approach to  
41 chronic pain: scientific advances and future directions. *Psychol Bull*. 2007;133(4):581-624.  
42 49. El-Metwally A, Salminen JJ, Auvinen A, Kautiainen H, Mikkelsen M. Lower limb pain in a  
43 preadolescent population: Prognosis and risk factors for chronicity - A prospective 1- and 4-year  
44 follow-up study. *Pediatrics*. 2005;116(3):673-81.  
45  
46  
47  
48  
49  
50  
51  
52  
53  
54  
55  
56  
57  
58  
59

**Figure 1 PRISMA Flow Chart presenting the flow of citations reviewed in the course of the systematic review**  
 37,884 articles were identified through search in eight databases, resulting in 211 articles for full-text eligibility screen and a final number of 25 studies for inclusion yielding 109 prognostic factors on musculoskeletal pain.

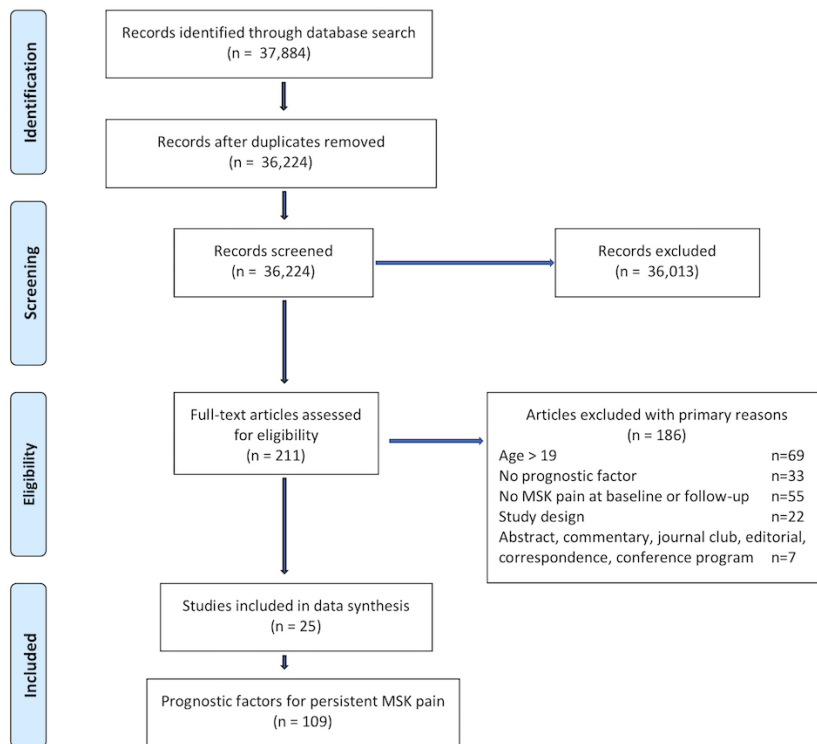

From: Moher D, Liberati A, Tetzlaff J, Altman DG, The PRISMA Group (2009). Preferred Reporting Items for Systematic Reviews and Meta-Analyses: The PRISMA Statement. *PLoS Med* 6(6): e1000097. doi:10.1371/journal.pmed1000097

For more information, visit [www.prisma-statement.org](http://www.prisma-statement.org).

PRISMA Flow Chart presenting the flow of citations reviewed in the course of the systematic review.

37,884 articles were identified through search in eight databases, resulting in 211 articles for full-text eligibility screen and a final number of 25 studies for inclusion yielding 109 prognostic factors on musculoskeletal pain.

90x116mm (300 x 300 DPI)

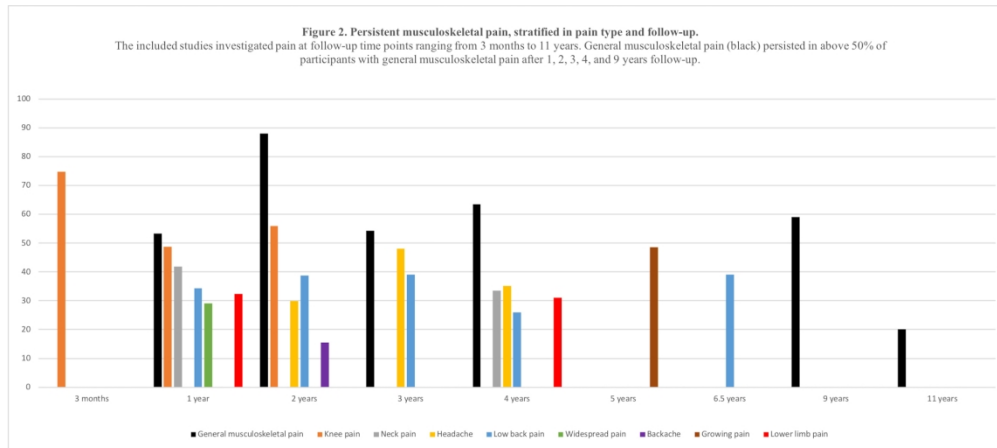

Persistent musculoskeletal pain, stratified in pain type and follow-up.

The included studies investigated pain at follow-up time points ranging from 3 months to 11 years. General musculoskeletal pain (black) persisted in above 50% of participants after 1, 2, 3, 4, and 9 years follow-up.

203x90mm (300 x 300 DPI)





**Table 2. Estimates on prognostic factors specified according to musculoskeletal pain type, baseline age, and follow-up in the included studies**

| Baseline age                         | Prognostic factors subgrouped according to the biopsychosocial model      | Musculoskeletal pain      | Neck pain           |                     |          |                                       |  |
|--------------------------------------|---------------------------------------------------------------------------|---------------------------|---------------------|---------------------|----------|---------------------------------------|--|
|                                      |                                                                           | Low back pain             | Low limb pain       | Headache            |          |                                       |  |
|                                      |                                                                           | Knee pain                 | Back pain           | Growing pain        |          |                                       |  |
|                                      |                                                                           | Study ID (Follow-up, yrs) | RR (95% CI)         | OR (95% CI)         | p-value  | Adjusted for                          |  |
| <b>BIOLOGICAL PROGNOSTIC FACTORS</b> |                                                                           |                           |                     |                     |          |                                       |  |
| <b>Female sex compared to male</b>   |                                                                           |                           |                     |                     |          |                                       |  |
| 8 to 13                              |                                                                           | 37 (3)                    |                     |                     | 0.038    |                                       |  |
| 10 to 16                             |                                                                           | 20 (11)                   |                     | M 1.8 (1.1-2.9)     |          |                                       |  |
| 9 to 12                              |                                                                           | 21 (4)                    | U 1.24 (1.07-1.44)  |                     |          | age                                   |  |
| 9 to 12                              |                                                                           | 28 (1)                    |                     | 1.78 (1.18-2.69)    | 0.006    |                                       |  |
| 9 to 12                              |                                                                           | 27 (1)                    |                     |                     | 0.001    |                                       |  |
| 12 to 15                             |                                                                           | 34 (2)                    | CR 1.29 (1.02-1.63) |                     | 0.08     |                                       |  |
| 12 to 15                             |                                                                           | 9 (1)                     |                     | 3.66 (1.09-12.33)   | 0.04     |                                       |  |
| 10 to 11                             |                                                                           | 39 (2)                    |                     |                     | M <0.001 |                                       |  |
| 10 to 11                             |                                                                           | 39 (2)                    |                     |                     | M <0.001 |                                       |  |
| 8, 11, 14                            |                                                                           | 20 (11)                   |                     | 2.24 (1.24-4.20)    |          |                                       |  |
| <b>Older age</b>                     |                                                                           |                           |                     |                     |          |                                       |  |
| 9 to 12                              | Older age                                                                 | 28 (1)                    |                     | 1.24 (1.02-1.50)    | 0.031    |                                       |  |
| 9 to 12 F                            | 11 to 13 years vs. 9-10 years                                             | 21 (4)                    | M 1.40 (1.17-1.67)  |                     |          |                                       |  |
| 12 to 15                             | Older age, increase per year, 12 years as referent                        | 9 (1)                     |                     | M 1.45 (1.07-1.95)  | 0.01     |                                       |  |
| 13                                   | Older age                                                                 | 25 (3)                    |                     |                     | 0.04     |                                       |  |
| <b>Body measurement factors</b>      |                                                                           |                           |                     |                     |          |                                       |  |
| 8 to 13                              | Higher pubertal group (a) group 2 and 3 vs. group 1                       | 37 (3)                    |                     |                     | 0.022    |                                       |  |
| 9 to 12 F                            | Beighton score 6-9 vs. score <6                                           | 21 (4)                    | M 1.31 (1.18-1.46)  |                     |          | age                                   |  |
| 11 to 14                             | Height < 158cm                                                            | 23 (4)                    | 2.2 (1.2-3.8)       |                     |          | age, sex                              |  |
| 9 to 12                              | Hypermobility score ≥/ =6 vs. <6                                          | 11 (4)                    |                     | M 2.93 (1.13-7.70)  |          |                                       |  |
| <b>Physical functioning</b>          |                                                                           |                           |                     |                     |          |                                       |  |
| 14 to 16                             | Ratio flexion mobility (cm)/extension strength (min) (b)                  | 36 (3)                    |                     | 1.9 (1.1-3.2)       | 0.02     | gender, well being, physical activity |  |
| 14 to 16                             | Ratio extension mobility cm/extension strength (min) (b)                  | 36 (3)                    |                     | 3.2 (1.3-8.3)       | 0.02     | gender                                |  |
| 14 to 16                             | Ratio flexion + extension mobility (cm)/extension strength (min) (b)      | 36 (3)                    |                     | 1.5 (1.1-2.2)       | 0.02     | gender, well being, physical activity |  |
| <b>Pain characteristics</b>          |                                                                           |                           |                     |                     |          |                                       |  |
| 2 to 17                              | Higher number of painful sites (mean 3.7 vs. 2.8) range 0-6               | 22 (9)                    |                     |                     | 0.04     |                                       |  |
| 2 to 17                              | More frequent generalised vs. localised pain (86 vs. 47%)                 | 22 (9)                    |                     | 84.0 (2.1-3000)     | 0.02     |                                       |  |
| 2 to 17                              | More intense pain (median 4.3 vs. 0.5cm) range 0-10cm VAS                 | 22 (9)                    |                     |                     | 0.03     |                                       |  |
| 2 to 17                              | Longer disease duration before first admission (median 1.4 vs. 0.5 years) | 22 (9)                    |                     |                     | <0.01    |                                       |  |
| 9 to 12                              | Pain at both baseline and 1 year follow-up vs. only baseline              | 21 (4)                    |                     | 2.9 (1.9-4.4)       |          | age                                   |  |
| 9 to 12 M                            | Multisite vs. localised pain                                              | 21 (4)                    | U 1.32 (1.04-1.66)  |                     |          | age                                   |  |
| 9 to 12 M                            | Headache (psychosomatic symptom (c))                                      | 21 (4)                    | M 1.43 (1.12-1.83)  |                     |          | age                                   |  |
| 9 to 12 F                            | Abdominal pain (psychosomatic symptom (c))                                | 21 (4)                    | U 1.20 (1.03-1.40)  |                     |          | age                                   |  |
| 11 to 14                             | Radiating leg pain vs. no radiating pain                                  | 23 (4)                    | 2.2 (1.4-3.6)       |                     |          | age, sex                              |  |
| 11 to 14                             | Low back pain start > 12 month prior to admission                         | 23 (4)                    | 2.4 (1.3-4.4)       |                     |          | age, sex                              |  |
| 11 to 14                             | Pain episode > 7 days vs < 24h                                            | 23 (4)                    | 2.6 (1.4-4.9)       |                     |          | age, sex                              |  |
| 15 to 19                             | Patellofemoral pain diagnosis vs. other types of knee pain                | 34 (2)                    | 1.24 (1.04-1.49)    |                     | 0.01     | age, sex, BMI                         |  |
| 15 to 19                             | High pressure pain threshold (PPT) around the knee                        | 35 (3mo)                  |                     |                     | 0.03     |                                       |  |
| 12 to 15                             | Daily vs. rare pain                                                       | 9 (1)                     |                     | M 6.31 (1.21-33.01) | 0.03     |                                       |  |
| 12 to 15                             | Pain several times/week vs. monthly                                       | 34 (2)                    | CR 1.58 (1.15-2.17) |                     | 0.005    |                                       |  |
| 16 to 18                             | Daily pain frequency vs. monthly                                          | 34 (2)                    | 1.58 (1.17-2.14)    |                     | 0.003    |                                       |  |
| 16 to 18                             | Longer pain duration per 10-months increase                               | 34 (2)                    | CR 1.04 (1.01-1.07) |                     | 0.01     |                                       |  |
| 9 to 12 M                            | Also headache (d) at least once a week                                    | 38 (4)                    |                     |                     | <0.001   |                                       |  |

|    |            |                                                                                |         |                     |                  |          |          |  |
|----|------------|--------------------------------------------------------------------------------|---------|---------------------|------------------|----------|----------|--|
| 1  | 9 to 12 M  | Also abdominal pain (d) at least a week                                        | 38 (4)  |                     |                  | <0.001   |          |  |
| 2  | 9 to 12 F  | Also headache (d) at least once a week                                         | 38 (4)  |                     |                  | <0.001   |          |  |
| 3  | 9 to 12 F  | Also abdominal pain (d) at least a week                                        | 38 (4)  |                     |                  | <0.001   |          |  |
| 4  | 9 to 12    | Other musculoskeletal symptoms: upper extremities at least once a week         | 38 (4)  |                     |                  | <0.001   |          |  |
| 5  | 9 to 12 M  | Other musculoskeletal symptoms: chest at least once a week                     | 38 (4)  |                     |                  | 0.008    |          |  |
| 6  | 9 to 12 F  | Other musculoskeletal symptoms: chest at least once a week                     | 38 (4)  |                     |                  | 0.001    |          |  |
| 7  | 9 to 12    | Other musculoskeletal symptoms: back at least once a week                      | 38 (4)  |                     |                  | <0.001   |          |  |
| 8  | 9 to 12 M  | Other musculoskeletal symptoms as well: lower extremities at least once a week | 38 (4)  |                     |                  | <0.001   |          |  |
| 9  | 9 to 12 F  | Other musculoskeletal symptoms as well: lower extremities at least once a week | 38 (4)  |                     |                  | 0.003    |          |  |
| 10 | 8, 11, 14  | Headache >= 1time/week                                                         | 20 (11) |                     | 2.3 (1.1-4.5)    |          |          |  |
| 11 | 10 to 16   | Duration of pain episodes > 3 hours vs. < 3 hours                              | 20 (11) |                     | U 3.1 (1.1-8.2)  |          |          |  |
| 12 | 10 to 16   | Lower pain threshold                                                           | 40 (5)  |                     |                  | <0.05    |          |  |
| 13 | 10 to 16   | Lower pain threshold at anterior tibial region (pressure level < 5kg/cm2)      | 40 (5)  |                     |                  | <0.01    |          |  |
| 14 |            | <b>PSYCHOLOGICAL PROGNOSTIC FACTORS</b>                                        |         |                     |                  |          |          |  |
| 15 |            | <b>General psychological factors</b>                                           |         |                     |                  |          |          |  |
| 16 | 16 M       | Internalization (e)                                                            | 33 (2)  |                     | 2.32 (1.23-4.37) |          |          |  |
| 17 | 16 M       | Externalization (e)                                                            | 33 (2)  |                     | 2.17 (1.24-3.81) |          |          |  |
| 18 | 16 F       | Internalization (e)                                                            | 33 (2)  |                     | 3.70 (1.88-7.27) |          |          |  |
| 19 | 10 to 16   | Often/sometimes nervous                                                        | 20 (11) |                     | M 2.1 (1.3-3.4)  |          |          |  |
| 20 | 16 to 18 M | Internalization (e)                                                            | 24 (2)  |                     |                  | < 0.001  |          |  |
| 21 | 16 to 18 M | Externalization (e)                                                            | 24 (2)  |                     |                  | < 0.001  |          |  |
| 22 | 16 to 18 F | Higher internalization score (e)                                               | 24 (2)  |                     |                  | < 0.001  |          |  |
| 23 | 16 to 18 F | Higher externalization score (e)                                               | 24 (2)  |                     |                  | < 0.001  |          |  |
| 24 | 10 to 16   | Self-perception of not feeling completely healthy                              | 20 (11) |                     | U 1.7 (1.1-2.8)  |          |          |  |
| 25 | 10 to 16   | Unsatisfied with own appearance                                                | 20 (11) |                     | U 1.6 (1.1-2.5)  |          |          |  |
| 26 | 12 to 15   | EQ-5D index score 0-25 vs. 75-100% quartiles (f)                               | 9 (1)   |                     | U 0.08           | <0.001   |          |  |
| 27 | 12 to 15   | EQ-5D index score 0-25 vs. 25-50% quartiles (f)                                | 9 (1)   |                     | U 0.29           | <0.001   |          |  |
| 28 | 12 to 15   | EQ-5D index score 25-50th % vs. 75th-100th % (f)                               | 34 (2)  | CR 1.81 (1.14-2.85) |                  | 0.01     |          |  |
| 29 | 12 to 15   | EQ-5D index score 0-25th % vs. 75th-100th % (f)                                | 34 (2)  | CR 2.00 (1.28-3.12) |                  | 0.002    |          |  |
| 30 | 10 to 11   | Self reported low self esteem                                                  | 39 (2)  |                     |                  | U < 0.01 |          |  |
| 31 | 10 to 11   | Parent reported adolescent low self esteem                                     | 39 (2)  |                     |                  | U < 0.01 |          |  |
| 32 |            | <b>Depressive factors</b>                                                      |         |                     |                  |          |          |  |
| 33 | 9 to 12 F  | Depressive feelings                                                            | 21 (4)  | U 1.21 (1.03-1.42)  |                  |          | age      |  |
| 34 | 9 to 12 F  | Depressive symptoms in a frequency of at least once a week                     | 38 (4)  |                     |                  | <0.001   |          |  |
| 35 | 9 to 12 M  | Depressive symptoms in a frequency of at least once a week                     | 38 (4)  |                     |                  | <0.001   |          |  |
| 36 | 12 to 16   | Higher score of anxiety and depressive symptoms (g)                            | 18 (4)  |                     | 1.4 (1.03-1.90)  | 0.032    |          |  |
| 37 | 10 to 11   | Self reported anxiety/depression                                               | 39 (2)  |                     |                  | M <0.01  |          |  |
| 38 | 10 to 11   | Parent reported adolescent anxiety/depression                                  | 39 (2)  |                     |                  | < 0.05   |          |  |
| 39 |            | <b>SOCIAL PROGNOSTIC FACTORS</b>                                               |         |                     |                  |          |          |  |
| 40 |            | <b>General social factors</b>                                                  |         |                     |                  |          |          |  |
| 41 | 2 to 17    | Lower paternal educational level (median 10 vs. 14 years education)            | 22 (9)  |                     |                  | p<0.01   |          |  |
| 42 | 2 to 17    | Lower maternal educational level (median 10 vs. 14 years education)            | 22 (9)  |                     |                  | p<0.01   |          |  |
| 43 | 2 to 17    | More chronic family difficulties (mean 4.3 vs. 2.9) (h)                        | 22 (9)  |                     |                  | p<0.01   |          |  |
| 44 | 10 to 16   | Doing well in school                                                           | 20 (11) |                     | U 1.8 (1.1-2.9)  |          |          |  |
| 45 | 9 to 12    | Higher disability index (i) 1-2 vs 0                                           | 28 (1)  | 1.72 (1.09-2.73)    |                  | 0.005    |          |  |
| 46 | 9 to 12    | Higher disability index (i) 3-5 vs 0                                           | 28 (1)  | 3.17 (1.54-6.55)    |                  | 0.005    |          |  |
| 47 | 9 to 12    | Higher disability index (i) 3-5 vs. 0                                          | 21 (4)  | U 1.23 (1.02-1.49)  |                  |          | age      |  |
| 48 | 11 to 14   | High vs. low peer relationship problems                                        | 23 (4)  | 2.4 (1.3-4.2)       |                  |          | age, sex |  |
| 49 | 11 to 14   | Difficulty standing in line for 10 minutes                                     | 23 (4)  | 2.7 (1.5-4.9)       |                  |          |          |  |
| 50 | 11 to 14   | Difficulties carrying a schoolbag                                              | 23 (4)  | 2.1 (1.1-4.0)       |                  |          |          |  |
| 51 | 11 to 14   | High limitation level HFAQ (j) 4-9 vs. 0-1 limitations                         | 23 (4)  | 4.1 (1.05-16.2)     |                  |          |          |  |
| 52 | 8, 11, 14  | Headache on non-school days                                                    | 20 (11) |                     | 3.1 (1.3-7.3)    |          |          |  |
| 53 | 13 M       | Use of physiotherapy for headache or neck pain during the past 6 months        | 25 (3)  |                     |                  | 0.004    |          |  |

|    |                                                                                                                                                                                                                                                                                                                                                                                                                                                                                                                                                                                                    |                                                                                                                                                                                                                                                                                                                                                            |        |                    |                    |        |                                                       |  |
|----|----------------------------------------------------------------------------------------------------------------------------------------------------------------------------------------------------------------------------------------------------------------------------------------------------------------------------------------------------------------------------------------------------------------------------------------------------------------------------------------------------------------------------------------------------------------------------------------------------|------------------------------------------------------------------------------------------------------------------------------------------------------------------------------------------------------------------------------------------------------------------------------------------------------------------------------------------------------------|--------|--------------------|--------------------|--------|-------------------------------------------------------|--|
| 1  | 10 to 11 F                                                                                                                                                                                                                                                                                                                                                                                                                                                                                                                                                                                         | Parental recurrent headache                                                                                                                                                                                                                                                                                                                                | 39 (2) |                    |                    | p<0.05 |                                                       |  |
| 2  | 10 to 16                                                                                                                                                                                                                                                                                                                                                                                                                                                                                                                                                                                           | At least one parent with a pain syndrome                                                                                                                                                                                                                                                                                                                   | 40 (5) |                    |                    | 0.047  |                                                       |  |
| 3  |                                                                                                                                                                                                                                                                                                                                                                                                                                                                                                                                                                                                    | <b>Sleep related factors</b>                                                                                                                                                                                                                                                                                                                               |        |                    |                    |        |                                                       |  |
| 4  | 9 to 12 F                                                                                                                                                                                                                                                                                                                                                                                                                                                                                                                                                                                          | Waking up during nights                                                                                                                                                                                                                                                                                                                                    | 21 (4) | U 1.18 (1.01-1.37) |                    |        | age                                                   |  |
| 5  | 16 F                                                                                                                                                                                                                                                                                                                                                                                                                                                                                                                                                                                               | Sleep <= 7h vs. 8-9 h/day                                                                                                                                                                                                                                                                                                                                  | 33 (2) |                    | 1.68 (1.05-2.68)   |        |                                                       |  |
| 6  | 9 to 12                                                                                                                                                                                                                                                                                                                                                                                                                                                                                                                                                                                            | Day tiredness, fatigue                                                                                                                                                                                                                                                                                                                                     | 28 (1) |                    | 1.86 (1.16-3.00)   | 0.010  |                                                       |  |
| 7  | 16 to 18 M                                                                                                                                                                                                                                                                                                                                                                                                                                                                                                                                                                                         | Insufficient sleeping time h/day (mean 8 vs. 8.5 h/day)                                                                                                                                                                                                                                                                                                    | 24 (2) |                    |                    | 0.001  |                                                       |  |
| 8  | 9 to 12 M                                                                                                                                                                                                                                                                                                                                                                                                                                                                                                                                                                                          | Difficulties falling asleep                                                                                                                                                                                                                                                                                                                                | 38 (4) |                    |                    | <0.001 |                                                       |  |
| 9  | 9 to 12 M                                                                                                                                                                                                                                                                                                                                                                                                                                                                                                                                                                                          | Daytime tiredness                                                                                                                                                                                                                                                                                                                                          | 38 (4) |                    |                    | <0.001 |                                                       |  |
| 10 | 9 to 12 M                                                                                                                                                                                                                                                                                                                                                                                                                                                                                                                                                                                          | Walking up during nights                                                                                                                                                                                                                                                                                                                                   | 38 (4) |                    |                    | 0.001  |                                                       |  |
| 11 | 9 to 12 F                                                                                                                                                                                                                                                                                                                                                                                                                                                                                                                                                                                          | Difficulties falling asleep                                                                                                                                                                                                                                                                                                                                | 38 (4) |                    |                    | <0.001 |                                                       |  |
| 12 | 9 to 12 F                                                                                                                                                                                                                                                                                                                                                                                                                                                                                                                                                                                          | Daytime tiredness                                                                                                                                                                                                                                                                                                                                          | 38 (4) |                    |                    | <0.001 |                                                       |  |
| 13 | 9 to 12 F                                                                                                                                                                                                                                                                                                                                                                                                                                                                                                                                                                                          | Walking up during nights                                                                                                                                                                                                                                                                                                                                   | 38 (4) |                    |                    | <0.001 |                                                       |  |
| 14 |                                                                                                                                                                                                                                                                                                                                                                                                                                                                                                                                                                                                    | <b>Physical activity / inactivity</b>                                                                                                                                                                                                                                                                                                                      |        |                    |                    |        |                                                       |  |
| 15 | 16 F                                                                                                                                                                                                                                                                                                                                                                                                                                                                                                                                                                                               | >=4 vs. 2-3 hours of moderate-to-vigorous physical activity/week                                                                                                                                                                                                                                                                                           | 33 (2) |                    | 1.63 (1.04-2.56)   |        |                                                       |  |
| 16 | 16 to 18 M                                                                                                                                                                                                                                                                                                                                                                                                                                                                                                                                                                                         | Longer sitting time outside school hours (mean 6.2 h/day)                                                                                                                                                                                                                                                                                                  | 24 (2) |                    |                    | 0.004  |                                                       |  |
| 17 | 12 to 15                                                                                                                                                                                                                                                                                                                                                                                                                                                                                                                                                                                           | Sports participation 3-7 t/wk vs. 0-2 t/wk                                                                                                                                                                                                                                                                                                                 | 9 (1)  |                    | M 2.01 (1.20-3.36) | 0.008  |                                                       |  |
| 18 | 9 to 12                                                                                                                                                                                                                                                                                                                                                                                                                                                                                                                                                                                            | Exercise frequency 5-7 t vs. 0-2/week                                                                                                                                                                                                                                                                                                                      | 11 (1) |                    | M 2.43 (1.16-5.05) |        |                                                       |  |
| 19 |                                                                                                                                                                                                                                                                                                                                                                                                                                                                                                                                                                                                    | <b>Alcohol</b>                                                                                                                                                                                                                                                                                                                                             |        |                    |                    |        |                                                       |  |
| 20 | 16 to 18 F                                                                                                                                                                                                                                                                                                                                                                                                                                                                                                                                                                                         | More than occasional consumption                                                                                                                                                                                                                                                                                                                           | 24 (2) |                    |                    | 0.038  |                                                       |  |
| 21 |                                                                                                                                                                                                                                                                                                                                                                                                                                                                                                                                                                                                    | <b>Smoking</b>                                                                                                                                                                                                                                                                                                                                             |        |                    |                    |        |                                                       |  |
| 22 | 16 F                                                                                                                                                                                                                                                                                                                                                                                                                                                                                                                                                                                               | Smoking vs. nonsmoking                                                                                                                                                                                                                                                                                                                                     | 33 (2) |                    | 1.89 (1.23-2.90)   |        |                                                       |  |
| 23 | 16 F                                                                                                                                                                                                                                                                                                                                                                                                                                                                                                                                                                                               | Smoking 5-7 days/week vs. nonsmoking                                                                                                                                                                                                                                                                                                                       | 30 (2) |                    | 2.52 (1.40-4.53)   |        | family's SES, physical activity, BMI, depressive mood |  |
| 24 | 16 F                                                                                                                                                                                                                                                                                                                                                                                                                                                                                                                                                                                               | Smoking 1-9 cigarettes/day vs. nonsmoking                                                                                                                                                                                                                                                                                                                  | 30 (2) |                    | 2.39 (1.40-4.08)   |        | family's SES, physical activity, BMI, depressive mood |  |
| 25 | 16 F                                                                                                                                                                                                                                                                                                                                                                                                                                                                                                                                                                                               | Smoking > 9 cigarettes/day vs. nonsmoking                                                                                                                                                                                                                                                                                                                  | 30 (2) |                    | 2.57 (1.03-6.46)   |        | family's SES, physical activity, BMI, depressive mood |  |
| 26 | 16 M                                                                                                                                                                                                                                                                                                                                                                                                                                                                                                                                                                                               | Smoking 1-9 cigarettes/day vs. nonsmoking                                                                                                                                                                                                                                                                                                                  | 30 (2) |                    | 2.68 (1.35-5.32)   |        | family's SES, physical activity, BMI, depressive mood |  |
| 27 | <b>Explanatory notes</b>                                                                                                                                                                                                                                                                                                                                                                                                                                                                                                                                                                           |                                                                                                                                                                                                                                                                                                                                                            |        |                    |                    |        |                                                       |  |
| 28 | F = prognostic factor only applicable for female participants, M = Male, when unspecified = unisex                                                                                                                                                                                                                                                                                                                                                                                                                                                                                                 |                                                                                                                                                                                                                                                                                                                                                            |        |                    |                    |        |                                                       |  |
| 29 | RR > 1 or < 1, OR > 1 or < 1, p < 0.05 indicate that the prognostic factor is associated with a higher risk of persistent MSK pain.                                                                                                                                                                                                                                                                                                                                                                                                                                                                |                                                                                                                                                                                                                                                                                                                                                            |        |                    |                    |        |                                                       |  |
| 30 | CI = confidence interval M = Multivariate analysis U = Univariate analysis CR = Crude                                                                                                                                                                                                                                                                                                                                                                                                                                                                                                              |                                                                                                                                                                                                                                                                                                                                                            |        |                    |                    |        |                                                       |  |
| 31 | a = Group 1: prepubertal, group 2: became pubertal during 3 years follow-up, and group 3: pubertal at baseline. The pubertal stage was assessed by the presence of secondary signs of pubertal development. For females, puberty was defined by the stage of breast development (Tanner stage >= 3) and menarche. For males, puberty was defined in presence of a testicles volume >= 12 ml and presence of pubic and underarm hair.                                                                                                                                                               |                                                                                                                                                                                                                                                                                                                                                            |        |                    |                    |        |                                                       |  |
| 32 | b = Low lumbar extension strenght and high ratios between lumbar mobility and lumbar extension strenght predicts future low back pain                                                                                                                                                                                                                                                                                                                                                                                                                                                              |                                                                                                                                                                                                                                                                                                                                                            |        |                    |                    |        |                                                       |  |
| 33 | c = childhood abdominal pain, headache, depressive symptoms, day tiredness, difficulties in falling asleep, waking up during nights are believed to be having a psychosomatic origin in the great majority of cases.                                                                                                                                                                                                                                                                                                                                                                               |                                                                                                                                                                                                                                                                                                                                                            |        |                    |                    |        |                                                       |  |
| 34 | d = Classified as: other physical and psychological symptoms, without further definition                                                                                                                                                                                                                                                                                                                                                                                                                                                                                                           |                                                                                                                                                                                                                                                                                                                                                            |        |                    |                    |        |                                                       |  |
| 35 | e = Internalizing score calculated from subscales: anxious/depressed, sithdrawn/depressed symptoms, and somatic complaints. Externalizing from rule-breaking and aggressive behaviour.                                                                                                                                                                                                                                                                                                                                                                                                             |                                                                                                                                                                                                                                                                                                                                                            |        |                    |                    |        |                                                       |  |
| 36 | f = EQ-5D assesses self-reported health status in 5 dimensions: mobility, self-care, usual activities, pain/discomfort, anxiety/depression and within 3 levels of severity: no problems, moderate or severe problems as well as scoring own current self-rated health status on VAS 0-100.                                                                                                                                                                                                                                                                                                         |                                                                                                                                                                                                                                                                                                                                                            |        |                    |                    |        |                                                       |  |
| 37 | g = Anxiety symptoms: been constantly scared and uneasy, felt tense and restless, worried too much about different matters. Depressive symptoms: felt hopeless when thinking of the future, felt down or sad.                                                                                                                                                                                                                                                                                                                                                                                      |                                                                                                                                                                                                                                                                                                                                                            |        |                    |                    |        |                                                       |  |
| 38 | h = Assessment of information about employment and education, economic matters, housing, marital or family discord, social networks and the physical and mental health of the family members. Score range 0-6, 6=severe family difficulties.                                                                                                                                                                                                                                                                                                                                                       |                                                                                                                                                                                                                                                                                                                                                            |        |                    |                    |        |                                                       |  |
| 39 | i = Subjective disability index calculated from answers to the following proposals: difficulty in falling asleep because of pain, difficulty sitting during a lesson, pain disturbs a walk more than 1km, pain disturbs physical exercise, pain disturbs hobbies. Range 0-5.                                                                                                                                                                                                                                                                                                                       |                                                                                                                                                                                                                                                                                                                                                            |        |                    |                    |        |                                                       |  |
| 40 | j = The modified Hannover functional ability Questionnaire HFAQ assesses whether pain and ache in low back make any of the following daily activities difficult: reaching up to get a book from a high shelf, carrying your school bag to school, sitting on a school chair for a 45-min lesson, standing in a queue for 10 min, sitting up in bed from a lying position, bending down to put your socks on, standing up from an arm chair at home, running fast to catch a bus, and sports activities at school. Low = 0-1 limitation, moderate = 2-3 limitations or high = 4-9 limitations (23). |                                                                                                                                                                                                                                                                                                                                                            |        |                    |                    |        |                                                       |  |
| 41 | k = Yunus criteria: pain modulation by physical activity, by weather, by anxiety and stress, poor sleep, headache, irritable bowel, soft tissue swelling in hands and feet, fatigue, numbness in hands and feet, feeling excited and nervous. Yes to minimum 3 symptoms to meet the Yunus criteria.                                                                                                                                                                                                                                                                                                |                                                                                                                                                                                                                                                                                                                                                            |        |                    |                    |        |                                                       |  |
| 42 | l = SES: Socioeconomic status                                                                                                                                                                                                                                                                                                                                                                                                                                                                                                                                                                      |                                                                                                                                                                                                                                                                                                                                                            |        |                    |                    |        |                                                       |  |
| 43 | m = CDI: Children's depression Inventory. Cut off point >= 13 indicating depressive symptoms                                                                                                                                                                                                                                                                                                                                                                                                                                                                                                       |                                                                                                                                                                                                                                                                                                                                                            |        |                    |                    |        |                                                       |  |
| 44 | <b>Identified baseline factors without association to persistent musculoskeletal pain, divided in pain type (study ID)</b>                                                                                                                                                                                                                                                                                                                                                                                                                                                                         |                                                                                                                                                                                                                                                                                                                                                            |        |                    |                    |        |                                                       |  |
| 45 | Musculoskeletal                                                                                                                                                                                                                                                                                                                                                                                                                                                                                                                                                                                    | Female: sitting h/day, sleep h/day, Male: physical activity MET-h/week and above occasional alcohol consumption, unisex: smoking pack years, body mass index (BMI) (24)                                                                                                                                                                                    |        |                    |                    |        |                                                       |  |
| 46 |                                                                                                                                                                                                                                                                                                                                                                                                                                                                                                                                                                                                    | Exercise frequency >3 vs. <3t/week, disability index 1-5 vs. 0 (i), waking up during nights (Male), day tiredness, difficulty falling asleep, depressive feelings (Male), headache (Female), absence one day or more from school vs. never being abscent due to pain, maximum volume O2 intake (per unit increase) measured during a shuttle run test (21) |        |                    |                    |        |                                                       |  |
| 47 |                                                                                                                                                                                                                                                                                                                                                                                                                                                                                                                                                                                                    | Headache, stomachache, depressive feelings, difficulty falling asleep, waking up during nights, Yunus criteria (k), increasing exercise amount, and hypermobility (28)                                                                                                                                                                                     |        |                    |                    |        |                                                       |  |
| 48 |                                                                                                                                                                                                                                                                                                                                                                                                                                                                                                                                                                                                    | Male: physical activity level, sitting >4 h/day, sleep <= 7 h/day, smoking and overweight. Female: externalization, sitting > 4h/day, overweight (33)                                                                                                                                                                                                      |        |                    |                    |        |                                                       |  |
| 49 |                                                                                                                                                                                                                                                                                                                                                                                                                                                                                                                                                                                                    | Increasing age (20, 27)                                                                                                                                                                                                                                                                                                                                    |        |                    |                    |        |                                                       |  |

|    |                     |                                                                                                                                                                                                                                                                                                                                                                                                                                                                                                                                                                                                                                              |  |  |  |  |  |  |
|----|---------------------|----------------------------------------------------------------------------------------------------------------------------------------------------------------------------------------------------------------------------------------------------------------------------------------------------------------------------------------------------------------------------------------------------------------------------------------------------------------------------------------------------------------------------------------------------------------------------------------------------------------------------------------------|--|--|--|--|--|--|
| 1  |                     | Increasing age, sex, family history of related diseases, VAS score assessed by physicians, elevated C-reactive protein (CRP), erythrocyte sedimentation rate (ESR), platelet count, lower score in psychosocial functioning reflecting mental health and functioning at school/work, within the family, with friends and in other social activities (Children's Global Assessment Scale, CGAS) (22)                                                                                                                                                                                                                                          |  |  |  |  |  |  |
| 2  |                     |                                                                                                                                                                                                                                                                                                                                                                                                                                                                                                                                                                                                                                              |  |  |  |  |  |  |
| 3  | <b>Low back</b>     | Extension strength (minutes) and plain sagittal mobility (36)                                                                                                                                                                                                                                                                                                                                                                                                                                                                                                                                                                                |  |  |  |  |  |  |
| 4  |                     | Akward trunk postures, physically demanding job (working hands above shoulders, awkward trunk posture and standing or walking), working regularly or irregularly, duration of work, work with specific physical load factors (31)                                                                                                                                                                                                                                                                                                                                                                                                            |  |  |  |  |  |  |
| 5  |                     | BMI (32)                                                                                                                                                                                                                                                                                                                                                                                                                                                                                                                                                                                                                                     |  |  |  |  |  |  |
| 6  |                     | Male: smoking 5-7 d/week vs. no smoking, smoking <9 cigarettes/day (30)                                                                                                                                                                                                                                                                                                                                                                                                                                                                                                                                                                      |  |  |  |  |  |  |
| 7  |                     | High emotional vs. low emotional problems, reaching to a high shelf, sitting up in bed, bending down to put on socks, high conduct problems, high hyperactivity, high prosocial behavior, widespread pain, headache, stomachache in the past month compared to none, daytime tiredness on a scale 0-10, 5-10 vs. 0-4, pain start < 12 months ago, pain lasts <= 7 days, pain today, pain severity on a scale 0-10, 4-10 vs. 0-3, Hannover 2-3 vs. 0-1 (23)                                                                                                                                                                                   |  |  |  |  |  |  |
| 8  |                     | Sex, increasing age, tobacco, profession: hairdresser and media/design compared to electrician, western ethnicity compared to non-western ethnicity, moderate/high vs. low socio-economic status (SES) (I), moderate/high vs. low physical activity level, BMI, moderate/high physical work demand vs. low (26)                                                                                                                                                                                                                                                                                                                              |  |  |  |  |  |  |
| 9  | <b>Knee</b>         | Increasing age compared to 15, participation in sports, BMI, EQ-5D index score 50-75th percentile compared to 75-100th, weekly pain frequency compared to monthly (34)                                                                                                                                                                                                                                                                                                                                                                                                                                                                       |  |  |  |  |  |  |
| 10 |                     | BMI, EQ-5D 50-75th percentile compared to 0-25th, monthly, weekly, several times a week pain frequency compared to rarely (9)                                                                                                                                                                                                                                                                                                                                                                                                                                                                                                                |  |  |  |  |  |  |
| 11 | <b>Lower limb</b>   | After 1 year follow-up: traumatic limb at baseline, exercise 3-4 t/week vs. 0-2 t, hypermobility score >= 6 vs. < 6. After 4 years follow-up: exercise frequency 5-7 t/week vs. 0-2 t, lower limb trauma at baseline. Common after both 1 and 4 years follow-up: age 11-14 vs. 9-11, frequency of exercise 2-4 times vs. once a week, multisite pain, female sex, headache, stomachache, depressive feelings, difficulty falling asleep, day tiredness, waking up during nights, school absence due to pain vs. never absent, disability symptoms >=3 vs. <=2, volume >Q2 max average or above, exercise frequency 3-4 t/week vs. 0-2 t (11) |  |  |  |  |  |  |
| 12 |                     |                                                                                                                                                                                                                                                                                                                                                                                                                                                                                                                                                                                                                                              |  |  |  |  |  |  |
| 13 | <b>Neck</b>         | Joint hypermobility Beighton 6-9, physical activity at least half and hour more than 3 times a week (38)                                                                                                                                                                                                                                                                                                                                                                                                                                                                                                                                     |  |  |  |  |  |  |
| 14 | <b>Growing pain</b> | Sex, ethnicity, increasing age (40)                                                                                                                                                                                                                                                                                                                                                                                                                                                                                                                                                                                                          |  |  |  |  |  |  |
| 15 | <b>Headache</b>     | Sex (19)                                                                                                                                                                                                                                                                                                                                                                                                                                                                                                                                                                                                                                     |  |  |  |  |  |  |
| 16 |                     | Pain frequency, pain in daily activities, physiotherapy, relaxation therapy, sport activity, stress at home or in hobbies, pain on palpation, pain threshold measured by dolorimeter, depressive symptoms, temporomandibular disorder, stress at school, use of computer (25)                                                                                                                                                                                                                                                                                                                                                                |  |  |  |  |  |  |
| 17 | <b>Widespread</b>   | Stress (20)                                                                                                                                                                                                                                                                                                                                                                                                                                                                                                                                                                                                                                  |  |  |  |  |  |  |
| 18 | <b>Back</b>         | Female sex, increasing age, tender point count, CDI > 13 (m), Yunus criteria >=3, sleep score, disability index (f), psychosomatic symptoms (29)                                                                                                                                                                                                                                                                                                                                                                                                                                                                                             |  |  |  |  |  |  |
| 19 |                     | Stress (20)                                                                                                                                                                                                                                                                                                                                                                                                                                                                                                                                                                                                                                  |  |  |  |  |  |  |

20 Prognostic factors are divided primarily in biological, psychological, and social factors and secondary according to musculoskeletal pain type. The prognostic value were reported with RR, OR, and/or p-value.

Review only

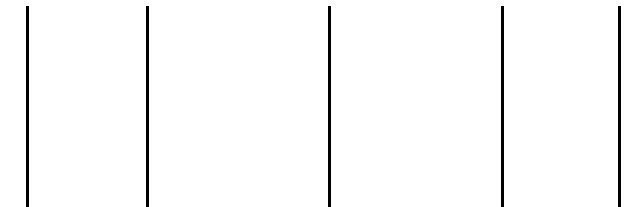

## Appendix 1

Search history

Medline Ovid May 30th 2017

|    |                                                                                                                                                                                                                                                                                                                                                                                                                                             |           |
|----|---------------------------------------------------------------------------------------------------------------------------------------------------------------------------------------------------------------------------------------------------------------------------------------------------------------------------------------------------------------------------------------------------------------------------------------------|-----------|
| 1  | back pain/ or headache/ or exp musculoskeletal pain/ or Abdominal Pain/ or Back Pain/ or Low Back Pain/ or exp Arthralgia/ or Chest Pain/ or Facial Pain/ or Flank Pain/ or Metatarsalgia/ or Neck Pain/                                                                                                                                                                                                                                    | 110,274   |
| 2  | Acute Pain/ or Chronic Pain/ or Breakthrough Pain/ or Pain, Intractable/ or Pain, Referred/                                                                                                                                                                                                                                                                                                                                                 | 16,079    |
| 3  | (musculoskeletal or back pain or backache or headache or joint or PFP or tendinitis or cervical or jaw or limb or shoulder or arm or elbow or wrist or carpal or hand or finger or collar or vertebral or lumbar or back or backache or back pain or headache or hip or knee or patella* or patellofemoral or retropatellar or leg or ankle or foot or heel or arthralgia or osteochondritis or osgood or growing pain* or scheuermann).mp. | 1,960,816 |
| 4  | 2 and 3                                                                                                                                                                                                                                                                                                                                                                                                                                     | 4,733     |
| 5  | (backache or headache).mp.                                                                                                                                                                                                                                                                                                                                                                                                                  | 78,052    |
| 6  | ((pain or ache) adj3 (musculoskeletal or back or joint or PFP or tendinitis or cervical or jaw or limb or shoulder or arm or elbow or wrist or carpal or hand or finger or collar or vertebral or lumbar or hip or knee or patella* or patellofemoral or retropatellar or leg or ankle or foot or heel or arthralgia or osteochondritis or osgood or growing pain* or scheuermann)).mp.                                                     | 103,970   |
| 7  | 1 or 4 or 5 or 6                                                                                                                                                                                                                                                                                                                                                                                                                            | 217,985   |
| 8  | limit 7 to "all child (0 to 18 years)"                                                                                                                                                                                                                                                                                                                                                                                                      | 41,139    |
| 9  | (juvenile or adolescen* or preadolescence or Preadolescent or preschool or child or children or prepubertal or kids or paediatric or pediatric or youth or young or childhood or schoolchild* or teenager).mp.                                                                                                                                                                                                                              | 3,721,647 |
| 10 | 7 and 9                                                                                                                                                                                                                                                                                                                                                                                                                                     | 54,465    |
| 11 | 8 or 10                                                                                                                                                                                                                                                                                                                                                                                                                                     | 55,016    |
| 12 | (predict* or long term or Follow-up or Prospective or cohort or cluster or prognosis or prognostic or Mediator* or treatment effect modifier* or longitudinal*).mp.                                                                                                                                                                                                                                                                         | 4,208,880 |
| 13 | 11 and 12                                                                                                                                                                                                                                                                                                                                                                                                                                   | 20,363    |
| 14 | (systematic reviews or meta analysis).pt.                                                                                                                                                                                                                                                                                                                                                                                                   | 80,495    |
| 15 | case report/ or (case reports or letter or historical article or comment or editorial).pt.                                                                                                                                                                                                                                                                                                                                                  | 3,595,207 |
| 16 | limit 13 to (systematic reviews or meta analysis)                                                                                                                                                                                                                                                                                                                                                                                           | 466       |
| 17 | 14 or 15                                                                                                                                                                                                                                                                                                                                                                                                                                    | 3,674,563 |
| 18 | 13 not (16 or 17)                                                                                                                                                                                                                                                                                                                                                                                                                           | 17,183    |

EMBASE Ovid May 31<sup>st</sup> 2017

|    |                                                                                                                                                                                                                                                                                                                                                                                                                                             |           |
|----|---------------------------------------------------------------------------------------------------------------------------------------------------------------------------------------------------------------------------------------------------------------------------------------------------------------------------------------------------------------------------------------------------------------------------------------------|-----------|
| 1  | exp *musculoskeletal pain/                                                                                                                                                                                                                                                                                                                                                                                                                  | 40,261    |
| 2  | exp *"headache and facial pain"/                                                                                                                                                                                                                                                                                                                                                                                                            | 73,629    |
| 3  | exp *abdominal pain/                                                                                                                                                                                                                                                                                                                                                                                                                        | 10,492    |
| 4  | *arthralgia/                                                                                                                                                                                                                                                                                                                                                                                                                                | 4,782     |
| 5  | *thorax pain/                                                                                                                                                                                                                                                                                                                                                                                                                               | 9,691     |
| 6  | *flank pain/                                                                                                                                                                                                                                                                                                                                                                                                                                | 245       |
| 7  | *metatarsalgia/                                                                                                                                                                                                                                                                                                                                                                                                                             | 522       |
| 8  | 1 or 2 or 3 or 4 or 5 or 6 or 7                                                                                                                                                                                                                                                                                                                                                                                                             | 137,602   |
| 9  | *chronic pain/                                                                                                                                                                                                                                                                                                                                                                                                                              | 20,500    |
| 10 | *breakthrough pain/                                                                                                                                                                                                                                                                                                                                                                                                                         | 346       |
| 11 | *intractable pain/                                                                                                                                                                                                                                                                                                                                                                                                                          | 2,166     |
| 12 | *referred pain/                                                                                                                                                                                                                                                                                                                                                                                                                             | 233       |
| 13 | or/9-12                                                                                                                                                                                                                                                                                                                                                                                                                                     | 23,135    |
| 14 | (musculoskeletal or back pain or backache or headache or joint or PFP or tendinitis or cervical or jaw or limb or shoulder or arm or elbow or wrist or carpal or hand or finger or collar or vertebral or lumbar or back or backache or back pain or headache or hip or knee or patella* or patellofemoral or retropatellar or leg or ankle or foot or heel or arthralgia or osteochondritis or osgood or growing pain* or scheuermann).mp. | 2,678,325 |
| 15 | 13 and 14                                                                                                                                                                                                                                                                                                                                                                                                                                   | 8,147     |
| 16 | (backache or headache).mp.                                                                                                                                                                                                                                                                                                                                                                                                                  | 261,495   |
| 17 | ((pain or ache) adj3 (musculoskeletal or back or joint or PFP or tendinitis or cervical or jaw or limb or shoulder or arm or elbow or wrist or carpal or hand or finger or collar or vertebral or lumbar or hip or knee or patella* or patellofemoral or retropatellar or leg or ankle or foot or heel or arthralgia or osteochondritis or osgood or growing pain* or scheuermann)).mp.                                                     | 171,769   |
| 18 | 8 or 15 or 16 or 17                                                                                                                                                                                                                                                                                                                                                                                                                         | 450,426   |
| 19 | limit 18 to (infant <to one year> or child <unspecified age> or preschool child <1 to 6 years> or school child <7 to 12 years> or adolescent <13 to 17 years>)                                                                                                                                                                                                                                                                              | 54,948    |
| 20 | (juvenile or adolescen* or preadolescence or Preadolescent or preschool or child or children or prepubertal or kids or paediatric or pediatric or youth or young or childhood or schoolchild* or teenager).mp.                                                                                                                                                                                                                              | 3,594,291 |
| 21 | 18 and 20                                                                                                                                                                                                                                                                                                                                                                                                                                   | 79,053    |
| 22 | 19 or 21                                                                                                                                                                                                                                                                                                                                                                                                                                    | 79,102    |

|    |                                                                                                                                                                     |           |
|----|---------------------------------------------------------------------------------------------------------------------------------------------------------------------|-----------|
| 23 | (predict* or long term or Follow-up or Prospective or cohort or cluster or prognosis or prognostic or Mediator* or treatment effect modifier* or longitudinal*).mp. | 5,319,110 |
| 24 | 22 and 23                                                                                                                                                           | 28,128    |
| 25 | limit 24 to ("systematic review" or meta analysis)                                                                                                                  | 497       |
| 26 | case report/ or (letter or editorial or conference*).pt.                                                                                                            | 6,706,285 |
| 27 | 25 or 26                                                                                                                                                            | 6,706,709 |
| 28 | 24 not 27                                                                                                                                                           | 17,726    |

For peer review only



CINAHL Ebsco May 31<sup>st</sup> 2017

| I   | Search Terms                                                                                                                                                                                                                                                                                                                                                                      | Search Options                                                                                                                                                                       | Results |
|-----|-----------------------------------------------------------------------------------------------------------------------------------------------------------------------------------------------------------------------------------------------------------------------------------------------------------------------------------------------------------------------------------|--------------------------------------------------------------------------------------------------------------------------------------------------------------------------------------|---------|
| S18 | S16 not S17                                                                                                                                                                                                                                                                                                                                                                       | Search modes - Boolean/Phrase                                                                                                                                                        | 3,716   |
| S17 | PT (Systematic Review or Meta Analysis)                                                                                                                                                                                                                                                                                                                                           | Search modes - Boolean/Phrase                                                                                                                                                        | 41,837  |
| S16 | S14 AND S15                                                                                                                                                                                                                                                                                                                                                                       | Search modes - Boolean/Phrase                                                                                                                                                        | 3,802   |
| S15 | (predict* or long term or Follow-up or Prospective or cohort or cluster or prognosis or prognostic or Mediator* or treatment effect modifier* or longitudinal*)                                                                                                                                                                                                                   | Search modes - Boolean/Phrase                                                                                                                                                        | 530,171 |
| S14 | S11 OR S13                                                                                                                                                                                                                                                                                                                                                                        | Search modes - Boolean/Phrase                                                                                                                                                        | 11,516  |
| S13 | S10 AND S12                                                                                                                                                                                                                                                                                                                                                                       | Search modes - Boolean/Phrase                                                                                                                                                        | 11,425  |
| S12 | (juvenile or adolescen* or preadolescence or Preadolescent or preschool or child or children or prepubertal or kids or paediatric or pediatric or youth or young or childhood or schoolchild* or teenager)                                                                                                                                                                        | Search modes - Boolean/Phrase                                                                                                                                                        | 590,118 |
| S11 | S1 OR S7 OR S8 OR S9                                                                                                                                                                                                                                                                                                                                                              | Limiters - Age Groups: Infant, Newborn: birth-1 month, Infant: 1-23 months, Child, Preschool: 2-5 years, Child: 6-12 years, Adolescent: 13-18 years<br>Search modes - Boolean/Phrase | 8,712   |
| S10 | S1 OR S7 OR S8 OR S9                                                                                                                                                                                                                                                                                                                                                              | Search modes - Boolean/Phrase                                                                                                                                                        | 64,982  |
| S9  | ((pain or ache) N3 (musculoskeletal or back or joint or PFP or tendinitis or cervical or jaw or limb or shoulder or arm or elbow or wrist or carpal or hand or finger or collar or vertebral or lumbar or hip or knee or patella* or patellofemoral or retropatellar or leg or ankle or foot or heel or arthralgia or osteochondritis or osgood or growing pain* or scheuermann)) | Search modes - Boolean/Phrase                                                                                                                                                        | 37,883  |
| S8  | backache or headache                                                                                                                                                                                                                                                                                                                                                              | Search modes - Boolean/Phrase                                                                                                                                                        | 16,417  |
| S7  | S5 AND S6                                                                                                                                                                                                                                                                                                                                                                         | Search modes - Boolean/Phrase                                                                                                                                                        | 4,707   |

|    |                                                                                                                                                                                                                                                                                                                                                                                                                                         |                               |         |
|----|-----------------------------------------------------------------------------------------------------------------------------------------------------------------------------------------------------------------------------------------------------------------------------------------------------------------------------------------------------------------------------------------------------------------------------------------|-------------------------------|---------|
| S6 | (musculoskeletal or back pain or backache or headache or joint or PFP or tendinitis or cervical or jaw or limb or shoulder or arm or elbow or wrist or carpal or hand or finger or collar or vertebral or lumbar or back or backache or back pain or headache or hip or knee or patella* or patellofemoral or retropatellar or leg or ankle or foot or heel or arthralgia or osteochondritis or osgood or growing pain* or scheuermann) | Search modes - Boolean/Phrase | 312,634 |
| S5 | S2 OR S3 OR S4                                                                                                                                                                                                                                                                                                                                                                                                                          | Search modes - Boolean/Phrase | 12,235  |
| S4 | (MH "Referred Pain")                                                                                                                                                                                                                                                                                                                                                                                                                    | Search modes - Boolean/Phrase | 284     |
| S3 | (MH "Breakthrough Pain")                                                                                                                                                                                                                                                                                                                                                                                                                | Search modes - Boolean/Phrase | 58      |
| S2 | (MH "Chronic Pain")                                                                                                                                                                                                                                                                                                                                                                                                                     | Search modes - Boolean/Phrase | 11,921  |
| S1 | (MH "Back Pain") OR (MH "Low Back Pain") OR (MH "Facial Pain") OR (MH "Headache") OR (MH "Knee Pain+") OR (MH "Metatarsalgia") OR (MH "Muscle Pain") OR (MH "Neck Pain") OR (MH "Arthralgia") OR (MH "Shoulder Pain") OR (MH "Chest Pain") OR (MH "Elbow Pain") OR (MH "Heel Pain") OR (MH "Abdominal Pain")                                                                                                                            | Search modes - Boolean/Phrase | 40,609  |

1  
2  
3  
4 Cochrane June 9<sup>th</sup> 2017  
5

6 Search Name:

7 Date Run: 09/06/17 10:28:15.152

8 Description:  
9

10 ID Search Hits

11 #1 ((pain or ache) next/3 (musculoskeletal or back pain or backache or headache or joint or  
12 PFP or tendinitis or cervical or jaw or limb or shoulder or arm or elbow or wrist or carpal or hand  
13 or finger or collar or vertebral or lumbar or back or backache or back pain or headache or hip or  
14 knee or patella\* or patellofemoral or retropatellar or leg or ankle or foot or heel or arthralgia or  
15 osteochondritis or osgood or growing pain\* or scheuermann)) 7405  
16

17 #2 (backache or headache) 26356

18 #3 #1 or #2 32236

19 #4 (juvenile or adolescen\* or preadolescence or Preadolescent or preschool or child or  
20 children or prepubertal or kids or paediatric or pediatric or youth or young or childhood or  
21 schoolchild\* or teenager) 243010  
22

23 #5 #3 and #4 8870

24 #6 (predict\* or long term or Follow-up or Prospective or cohort or cluster or prognosis or  
25 prognostic or Mediator\* or treatment effect modifier\* or longitudinal\*) 399020  
26

27 #7 #5 and #6 4430  
28

29 All Results (4430)

30  Cochrane Reviews (1311)

31  All

32  Review

33  Protocol

34  Other Reviews (66)

35  Trials (3002)

36  Methods Studies (0)

37  Technology Assessments (4)

38  Economic Evaluations (34)

39  Cochrane Groups (13)  
40  
41  
42

43 Imported: Trial, Technology, Economic  
44  
45  
46  
47  
48  
49  
50  
51  
52  
53  
54  
55  
56  
57  
58  
59  
60

Web of Science June 9<sup>th</sup> 2017

| Set | Results   |                                                                                                                                                                                                                                                                                                                                                                                                                                                                                                                                       | Edit Sets | Combine Sets<br><input type="radio"/> AND <input type="radio"/> OR | Delete Sets<br>Select All<br>Delete |
|-----|-----------|---------------------------------------------------------------------------------------------------------------------------------------------------------------------------------------------------------------------------------------------------------------------------------------------------------------------------------------------------------------------------------------------------------------------------------------------------------------------------------------------------------------------------------------|-----------|--------------------------------------------------------------------|-------------------------------------|
| # 9 | 11,624    | #8 AND #7<br><i>Indexes=SCI-EXPANDED, SSCI, A&amp;HCI, CPCI-S, CPCI-SSH, ESCI Timespan=All years</i>                                                                                                                                                                                                                                                                                                                                                                                                                                  | Edit      | <input type="checkbox"/>                                           | <input type="checkbox"/>            |
| # 8 | 5,905,200 | ts=(predict* or long term or Follow-up or Prospective or cohort or cluster or prognosis or prognostic or Mediator* or treatment effect modifier* or longitudinal*)<br><i>Indexes=SCI-EXPANDED, SSCI, A&amp;HCI, CPCI-S, CPCI-SSH, ESCI Timespan=All years</i>                                                                                                                                                                                                                                                                         | Edit      | <input type="checkbox"/>                                           | <input type="checkbox"/>            |
| # 7 | 29,467    | #6 AND #5<br><i>Indexes=SCI-EXPANDED, SSCI, A&amp;HCI, CPCI-S, CPCI-SSH, ESCI Timespan=All years</i>                                                                                                                                                                                                                                                                                                                                                                                                                                  | Edit      | <input type="checkbox"/>                                           | <input type="checkbox"/>            |
| # 6 | 2,457,687 | ts=(juvenile or adolescen* or preadolescence or Preadolescent or preschool or child or children or prepubertal or kids or paediatric or pediatric or youth or young or childhood or schoolchild* or teenager)<br><i>Indexes=SCI-EXPANDED, SSCI, A&amp;HCI, CPCI-S, CPCI-SSH, ESCI Timespan=All years</i>                                                                                                                                                                                                                              | Edit      | <input type="checkbox"/>                                           | <input type="checkbox"/>            |
| # 5 | 240,860   | #4 OR #3<br><i>Indexes=SCI-EXPANDED, SSCI, A&amp;HCI, CPCI-S, CPCI-SSH, ESCI Timespan=All years</i>                                                                                                                                                                                                                                                                                                                                                                                                                                   | Edit      | <input type="checkbox"/>                                           | <input type="checkbox"/>            |
| # 4 | 66,234    | ts=(backache or headache)<br><i>Indexes=SCI-EXPANDED, SSCI, A&amp;HCI, CPCI-S, CPCI-SSH, ESCI Timespan=All years</i>                                                                                                                                                                                                                                                                                                                                                                                                                  | Edit      | <input type="checkbox"/>                                           | <input type="checkbox"/>            |
| # 3 | 191,133   | #2 AND #1<br><i>Indexes=SCI-EXPANDED, SSCI, A&amp;HCI, CPCI-S, CPCI-SSH, ESCI Timespan=All years</i>                                                                                                                                                                                                                                                                                                                                                                                                                                  | Edit      | <input type="checkbox"/>                                           | <input type="checkbox"/>            |
| # 2 | 2,616,397 | TS=(musculoskeletal or back pain or backache or headache or joint or PFP or tendinitis or cervical or jaw or limb or shoulder or arm or elbow or wrist or carpal or hand or finger or collar or vertebral or lumbar or back or backache or back pain or headache or hip or knee or patella* or patellofemoral or retropatellar or leg or ankle or foot or heel or arthralgia or osteochondritis or osgood or growing pain* or scheuermann)<br><i>Indexes=SCI-EXPANDED, SSCI, A&amp;HCI, CPCI-S, CPCI-SSH, ESCI Timespan=All years</i> | Edit      | <input type="checkbox"/>                                           | <input type="checkbox"/>            |
| # 1 | 491,777   | ts=(pain or ache)<br><i>Indexes=SCI-EXPANDED, SSCI, A&amp;HCI, CPCI-S, CPCI-SSH, ESCI Timespan=All years</i>                                                                                                                                                                                                                                                                                                                                                                                                                          | Edit      | <input type="checkbox"/>                                           | <input type="checkbox"/>            |
|     |           |                                                                                                                                                                                                                                                                                                                                                                                                                                                                                                                                       |           | <input type="radio"/> AND <input type="radio"/> OR                 | Select All<br>Combine<br>Delete     |

Peer review only

SportDiscus June 9<sup>th</sup> 2017

|    |                                                                                                                                                                                                                                                                                                                                                                                   |                               |         |
|----|-----------------------------------------------------------------------------------------------------------------------------------------------------------------------------------------------------------------------------------------------------------------------------------------------------------------------------------------------------------------------------------|-------------------------------|---------|
| S7 | ((predict* or long term or Follow-up or Prospective or cohort or cluster or prognosis or prognostic or Mediator* or treatment effect modifier* or longitudinal*)) AND (S5 AND S6)                                                                                                                                                                                                 | Search modes - Boolean/Phrase | 843     |
| S6 | (predict* or long term or Follow-up or Prospective or cohort or cluster or prognosis or prognostic or Mediator* or treatment effect modifier* or longitudinal*)                                                                                                                                                                                                                   | Search modes - Boolean/Phrase | 118,227 |
| S5 | S3 AND S4                                                                                                                                                                                                                                                                                                                                                                         | Search modes - Boolean/Phrase | 2,876   |
| S4 | (juvenile or adolescen* or preadolescence or Preadolescent or preschool or child or children or prepubertal or kids or paediatric or pediatric or youth or young or childhood or schoolchild* or teenager)                                                                                                                                                                        | Search modes - Boolean/Phrase | 200,385 |
| S3 | (S1 OR S2)                                                                                                                                                                                                                                                                                                                                                                        | Search modes - Boolean/Phrase | 25,984  |
| S2 | backache or headache                                                                                                                                                                                                                                                                                                                                                              | Search modes - Boolean/Phrase | 12,066  |
| S1 | ((pain or ache) N3 (musculoskeletal or back or joint or PFP or tendinitis or cervical or jaw or limb or shoulder or arm or elbow or wrist or carpal or hand or finger or collar or vertebral or lumbar or hip or knee or patella* or patellofemoral or retropatellar or leg or ankle or foot or heel or arthralgia or osteochondritis or osgood or growing pain* or scheuermann)) | Search modes - Boolean/Phrase | 18,440  |

1  
2  
3  
4 OT-seeker June 9<sup>th</sup> 2017  
5

6 ((pain or ache)

7 AND

8 (musculoskeletal or back pain or backache or headache or joint or PFP or tendinitis or cervical or  
9 jaw or limb or shoulder or arm or elbow or wrist or carpal or hand or finger or collar or vertebral or  
10 lumbar or back or backache or back pain or headache or hip or knee or patella\* or patellofemoral or  
11 retropatellar or leg or ankle or foot or heel or arthralgia or osteochondritis or osgood or growing  
12 pain\* or scheuermann))

13 AND

14 juvenile or adolescen\* or preadolescence or Preadolescent or preschool or child or children or  
15 prepubertal or kids or paediatric or pediatric or youth or young or childhood or schoolchild\* or  
16 teenager  
17  
18  
19  
20  
21  
22  
23  
24  
25  
26  
27  
28  
29  
30  
31  
32  
33  
34  
35  
36  
37  
38  
39  
40  
41  
42  
43  
44  
45  
46  
47  
48  
49  
50  
51  
52  
53  
54  
55  
56  
57  
58  
59  
60

PsychInfo June 9<sup>th</sup> 2017

|    |                                                                                                                                                                                                                                                                                                                                                                                                                                             |         |
|----|---------------------------------------------------------------------------------------------------------------------------------------------------------------------------------------------------------------------------------------------------------------------------------------------------------------------------------------------------------------------------------------------------------------------------------------------|---------|
| 1  | exp Musculoskeletal Disorders/                                                                                                                                                                                                                                                                                                                                                                                                              | 15,728  |
| 2  | headache/ or muscle contraction headache/                                                                                                                                                                                                                                                                                                                                                                                                   | 7,110   |
| 3  | myofascial pain/                                                                                                                                                                                                                                                                                                                                                                                                                            | 317     |
| 4  | back pain/                                                                                                                                                                                                                                                                                                                                                                                                                                  | 3,411   |
| 5  | or/1-4                                                                                                                                                                                                                                                                                                                                                                                                                                      | 25,776  |
| 6  | chronic pain/                                                                                                                                                                                                                                                                                                                                                                                                                               | 11,631  |
| 7  | pain/                                                                                                                                                                                                                                                                                                                                                                                                                                       | 22,243  |
| 8  | 6 or 7                                                                                                                                                                                                                                                                                                                                                                                                                                      | 33,184  |
| 9  | (musculoskeletal or back pain or backache or headache or joint or PFP or tendinitis or cervical or jaw or limb or shoulder or arm or elbow or wrist or carpal or hand or finger or collar or vertebral or lumbar or back or backache or back pain or headache or hip or knee or patella* or patellofemoral or retropatellar or leg or ankle or foot or heel or arthralgia or osteochondritis or osgood or growing pain* or scheuermann).mp. | 220,772 |
| 10 | 8 and 9                                                                                                                                                                                                                                                                                                                                                                                                                                     | 9,266   |
| 11 | (backache or headache).mp.                                                                                                                                                                                                                                                                                                                                                                                                                  | 18,772  |
| 12 | ((pain or ache) adj3 (musculoskeletal or back or joint or PFP or tendinitis or cervical or jaw or limb or shoulder or arm or elbow or wrist or carpal or hand or finger or collar or vertebral or lumbar or hip or knee or patella* or patellofemoral or retropatellar or leg or ankle or foot or heel or arthralgia or osteochondritis or osgood or growing pain* or scheuermann)).mp.                                                     | 9,290   |
| 13 | 5 or 10 or 11 or 12                                                                                                                                                                                                                                                                                                                                                                                                                         | 43,824  |
| 14 | limit 13 to (100 childhood <birth to age 12 yrs> or 200 adolescence <age 13 to 17 yrs>)                                                                                                                                                                                                                                                                                                                                                     | 5,603   |
| 15 | (juvenile or adolescen* or preadolescence or Preadolescent or preschool or child or children or prepubertal or kids or paediatric or pediatric or youth or young or childhood or schoolchild* or teenager).mp.                                                                                                                                                                                                                              | 895,379 |
| 16 | 13 and 15                                                                                                                                                                                                                                                                                                                                                                                                                                   | 5,465   |
| 17 | 14 or 16                                                                                                                                                                                                                                                                                                                                                                                                                                    | 7,676   |
| 18 | (predict* or long term or Follow-up or Prospective or cohort or cluster or prognosis or prognostic or Mediator* or treatment effect modifier* or longitudinal*).mp.                                                                                                                                                                                                                                                                         | 723,493 |
| 19 | 17 and 18                                                                                                                                                                                                                                                                                                                                                                                                                                   | 2,119   |
| 20 | ((systematic or method*) adj3 (review* or overview* or study or studies or search* or approach*)) or meta analy* or meta-analy* or metaanaly*).ti,ab,id.                                                                                                                                                                                                                                                                                    | 142,307 |
| 21 | limit 19 to ("0830 systematic review" or 1200 meta analysis)                                                                                                                                                                                                                                                                                                                                                                                | 36      |
| 22 | 21 or 20                                                                                                                                                                                                                                                                                                                                                                                                                                    | 142,310 |

|    |                                |        |
|----|--------------------------------|--------|
| 23 | 19 not 22                      | 1,971  |
| 1  | exp Musculoskeletal Disorders/ | 15,728 |

For peer review only



# Reporting checklist for systematic review and meta-analysis.

Based on the PRISMA guidelines.

## Instructions to authors

Complete this checklist by entering the page numbers from your manuscript where readers will find each of the items listed below.

Your article may not currently address all the items on the checklist. Please modify your text to include the missing information. If you are certain that an item does not apply, please write "n/a" and provide a short explanation.

Upload your completed checklist as an extra file when you submit to a journal.

In your methods section, say that you used the PRISMA reporting guidelines, and cite them as:

Moher D, Liberati A, Tetzlaff J, Altman DG, The PRISMA Group. Preferred Reporting Items for Systematic Reviews and Meta-Analyses: The PRISMA Statement

|                    | Reporting Item                                                                                                                                                                                                                                                                                                | Page Number |
|--------------------|---------------------------------------------------------------------------------------------------------------------------------------------------------------------------------------------------------------------------------------------------------------------------------------------------------------|-------------|
|                    | #1 Identify the report as a systematic review, meta-analysis, or both.                                                                                                                                                                                                                                        | 1           |
| Structured summary | #2 Provide a structured summary including, as applicable: background; objectives; data sources; study eligibility criteria, participants, and interventions; study appraisal and synthesis methods; results; limitations; conclusions and implications of key findings; systematic review registration number | 2           |
| Rationale          | #3 Describe the rationale for the review in the context of what is already known.                                                                                                                                                                                                                             | 3           |
| Objectives         | #4 Provide an explicit statement of questions being addressed with reference to participants, interventions, comparisons, outcomes, and study design (PICOS).                                                                                                                                                 | 3           |
| Protocol and       | #5 Indicate if a review protocol exists, if and where it can be                                                                                                                                                                                                                                               | 3           |

|    |                                    |     |                                                                                                                                                                                                                                 |   |
|----|------------------------------------|-----|---------------------------------------------------------------------------------------------------------------------------------------------------------------------------------------------------------------------------------|---|
| 1  | registration                       |     | accessed (e.g., Web address) and, if available, provide registration information including the registration number.                                                                                                             |   |
| 2  |                                    |     |                                                                                                                                                                                                                                 |   |
| 3  |                                    |     |                                                                                                                                                                                                                                 |   |
| 4  | Eligibility criteria               | #6  | Specify study characteristics (e.g., PICOS, length of follow-up) and report characteristics (e.g., years considered, language, publication status) used as criteria for eligibility, giving rational                            | 3 |
| 5  |                                    |     |                                                                                                                                                                                                                                 |   |
| 6  |                                    |     |                                                                                                                                                                                                                                 |   |
| 7  |                                    |     |                                                                                                                                                                                                                                 |   |
| 8  |                                    |     |                                                                                                                                                                                                                                 |   |
| 9  | Information sources                | #7  | Describe all information sources in the search (e.g., databases with dates of coverage, contact with study authors to identify additional studies) and date last searched.                                                      | 3 |
| 10 |                                    |     |                                                                                                                                                                                                                                 |   |
| 11 |                                    |     |                                                                                                                                                                                                                                 |   |
| 12 |                                    |     |                                                                                                                                                                                                                                 |   |
| 13 |                                    |     |                                                                                                                                                                                                                                 |   |
| 14 |                                    |     |                                                                                                                                                                                                                                 |   |
| 15 | Search                             | #8  | Present full electronic search strategy for at least one database, including any limits used, such that it could be repeated.                                                                                                   | 3 |
| 16 |                                    |     |                                                                                                                                                                                                                                 |   |
| 17 |                                    |     |                                                                                                                                                                                                                                 |   |
| 18 |                                    |     |                                                                                                                                                                                                                                 |   |
| 19 | Study selection                    | #9  | State the process for selecting studies (i.e., for screening, for determining eligibility, for inclusion in the systematic review, and, if applicable, for inclusion in the meta-analysis).                                     | 3 |
| 20 |                                    |     |                                                                                                                                                                                                                                 |   |
| 21 |                                    |     |                                                                                                                                                                                                                                 |   |
| 22 |                                    |     |                                                                                                                                                                                                                                 |   |
| 23 |                                    |     |                                                                                                                                                                                                                                 |   |
| 24 | Data collection process            | #10 | Describe the method of data extraction from reports (e.g., piloted forms, independently by two reviewers) and any processes for obtaining and confirming data from investigators.                                               | 4 |
| 25 |                                    |     |                                                                                                                                                                                                                                 |   |
| 26 |                                    |     |                                                                                                                                                                                                                                 |   |
| 27 |                                    |     |                                                                                                                                                                                                                                 |   |
| 28 |                                    |     |                                                                                                                                                                                                                                 |   |
| 29 |                                    |     |                                                                                                                                                                                                                                 |   |
| 30 | Data items                         | #11 | List and define all variables for which data were sought (e.g., PICOS, funding sources), and any assumptions and simplifications made.                                                                                          | 4 |
| 31 |                                    |     |                                                                                                                                                                                                                                 |   |
| 32 |                                    |     |                                                                                                                                                                                                                                 |   |
| 33 |                                    |     |                                                                                                                                                                                                                                 |   |
| 34 |                                    |     |                                                                                                                                                                                                                                 |   |
| 35 |                                    |     |                                                                                                                                                                                                                                 |   |
| 36 | Risk of bias in individual studies | #12 | Describe methods used for assessing risk of bias in individual studies (including specification of whether this was done at the study or outcome level, or both), and how this information is to be used in any data synthesis. | 4 |
| 37 |                                    |     |                                                                                                                                                                                                                                 |   |
| 38 |                                    |     |                                                                                                                                                                                                                                 |   |
| 39 |                                    |     |                                                                                                                                                                                                                                 |   |
| 40 |                                    |     |                                                                                                                                                                                                                                 |   |
| 41 |                                    |     |                                                                                                                                                                                                                                 |   |
| 42 |                                    |     |                                                                                                                                                                                                                                 |   |
| 43 | Summary measures                   | #13 | State the principal summary measures (e.g., risk ratio, difference in means).                                                                                                                                                   | 4 |
| 44 |                                    |     |                                                                                                                                                                                                                                 |   |
| 45 |                                    |     |                                                                                                                                                                                                                                 |   |
| 46 |                                    |     |                                                                                                                                                                                                                                 |   |
| 47 | Planned methods of analysis        | #14 | Describe the methods of handling data and combining results of studies, if done, including measures of consistency (e.g., I <sup>2</sup> ) for each meta-analysis.                                                              | 5 |
| 48 |                                    |     |                                                                                                                                                                                                                                 |   |
| 49 |                                    |     |                                                                                                                                                                                                                                 |   |
| 50 |                                    |     |                                                                                                                                                                                                                                 |   |
| 51 |                                    |     |                                                                                                                                                                                                                                 |   |
| 52 | Risk of bias across studies        | #15 | Specify any assessment of risk of bias that may affect the cumulative evidence (e.g., publication bias, selective reporting within studies).                                                                                    | 5 |
| 53 |                                    |     |                                                                                                                                                                                                                                 |   |
| 54 |                                    |     |                                                                                                                                                                                                                                 |   |
| 55 |                                    |     |                                                                                                                                                                                                                                 |   |
| 56 |                                    |     |                                                                                                                                                                                                                                 |   |
| 57 |                                    |     |                                                                                                                                                                                                                                 |   |
| 58 | Additional                         | #16 | Describe methods of additional analyses (e.g., sensitivity or                                                                                                                                                                   | 5 |
| 59 |                                    |     |                                                                                                                                                                                                                                 |   |
| 60 |                                    |     |                                                                                                                                                                                                                                 |   |

|    |                    |     |                                                                      |   |
|----|--------------------|-----|----------------------------------------------------------------------|---|
| 1  | analyses           |     | subgroup analyses, meta-regression), if done, indicating which       |   |
| 2  |                    |     | were pre-specified.                                                  |   |
| 3  |                    |     |                                                                      |   |
| 4  | Study selection    | #17 | Give numbers of studies screened, assessed for eligibility, and      | 5 |
| 5  |                    |     | included in the review, with reasons for exclusions at each stage,   |   |
| 6  |                    |     | ideally with a flow diagram.                                         |   |
| 7  |                    |     |                                                                      |   |
| 8  |                    |     |                                                                      |   |
| 9  | Study              | #18 | For each study, present characteristics for which data were          | 5 |
| 10 | characteristics    |     | extracted (e.g., study size, PICOS, follow-up period) and provide    |   |
| 11 |                    |     | the citation.                                                        |   |
| 12 |                    |     |                                                                      |   |
| 13 |                    |     |                                                                      |   |
| 14 |                    |     |                                                                      |   |
| 15 | Risk of bias       | #19 | Present data on risk of bias of each study and, if available, any    | 5 |
| 16 | within studies     |     | outcome-level assessment (see Item 12).                              |   |
| 17 |                    |     |                                                                      |   |
| 18 |                    |     |                                                                      |   |
| 19 | Results of         | #20 | For all outcomes considered (benefits and harms), present, for       | 5 |
| 20 | individual studies |     | each study: (a) simple summary data for each intervention group      |   |
| 21 |                    |     | and (b) effect estimates and confidence intervals, ideally with a    |   |
| 22 |                    |     | forest plot.                                                         |   |
| 23 |                    |     |                                                                      |   |
| 24 |                    |     |                                                                      |   |
| 25 |                    |     |                                                                      |   |
| 26 | Synthesis of       | #21 | Present the main results of the review. If meta-analyses are         | 5 |
| 27 | results            |     | done, include for each, confidence intervals and measures of         |   |
| 28 |                    |     | consistency.                                                         |   |
| 29 |                    |     |                                                                      |   |
| 30 |                    |     |                                                                      |   |
| 31 | Risk of bias       | #22 | Present results of any assessment of risk of bias across studies     | 5 |
| 32 | across studies     |     | (see Item 15).                                                       |   |
| 33 |                    |     |                                                                      |   |
| 34 |                    |     |                                                                      |   |
| 35 | Additional         | #23 | Give results of additional analyses, if done (e.g., sensitivity or   | 5 |
| 36 | analysis           |     | subgroup analyses, meta-regression [see Item 16]).                   |   |
| 37 |                    |     |                                                                      |   |
| 38 |                    |     |                                                                      |   |
| 39 | Summary of         | #24 | Summarize the main findings, including the strength of evidence      | 7 |
| 40 | Evidence           |     | for each main outcome; consider their relevance to key groups        |   |
| 41 |                    |     | (e.g., health care providers, users, and policy makers               |   |
| 42 |                    |     |                                                                      |   |
| 43 |                    |     |                                                                      |   |
| 44 |                    |     |                                                                      |   |
| 45 | Limitations        | #25 | Discuss limitations at study and outcome level (e.g., risk of bias), | 7 |
| 46 |                    |     | and at review level (e.g., incomplete retrieval of identified        |   |
| 47 |                    |     | research, reporting bias).                                           |   |
| 48 |                    |     |                                                                      |   |
| 49 |                    |     |                                                                      |   |
| 50 | Conclusions        | #26 | Provide a general interpretation of the results in the context of    | 7 |
| 51 |                    |     | other evidence, and implications for future research.                |   |
| 52 |                    |     |                                                                      |   |
| 53 |                    |     |                                                                      |   |
| 54 | Funding            | #27 | Describe sources of funding or other support (e.g., supply of        | 8 |
| 55 |                    |     | data) for the systematic review; role of funders for the systematic  |   |
| 56 |                    |     | review.                                                              |   |
| 57 |                    |     |                                                                      |   |
| 58 |                    |     |                                                                      |   |
| 59 |                    |     |                                                                      |   |
| 60 |                    |     |                                                                      |   |

1 The PRISMA checklist is distributed under the terms of the Creative Commons Attribution License  
2 CC-BY. This checklist was completed on 29. June 2018 using <http://www.goodreports.org/>, a tool  
3 made by the [EQUATOR Network](#) in collaboration with [Penelope.ai](#)  
4  
5  
6  
7  
8  
9  
10  
11  
12  
13  
14  
15  
16  
17  
18  
19  
20  
21  
22  
23  
24  
25  
26  
27  
28  
29  
30  
31  
32  
33  
34  
35  
36  
37  
38  
39  
40  
41  
42  
43  
44  
45  
46  
47  
48  
49  
50  
51  
52  
53  
54  
55  
56  
57  
58  
59  
60

**PROSPERO**  
**International prospective register of systematic reviews**

UNIVERSITY of York  
 Centre for Reviews and Dissemination

## Systematic review

Please complete all mandatory fields below (marked with an asterisk \*) and as many of the non-mandatory fields as you can then click *Submit* to submit your registration. You don't need to complete everything in one go, this record will appear in your *My PROSPERO* section of the web site and you can continue to edit it until you are ready to submit. Click *Show help* below or click on the icon to see guidance on completing each section.

This record cannot be edited because it has been rejected

### 1. \* Review title.

Give the working title of the review, for example the one used for obtaining funding. Ideally the title should state succinctly the interventions or exposures being reviewed and the associated health or social problems. Where appropriate, the title should use the PI(E)COS structure to contain information on the Participants, Intervention (or Exposure) and Comparison groups, the Outcomes to be measured and Study designs to be included.

Prognostic factors and treatment effect modifiers for children and adolescents with musculoskeletal pain: a protocol for a systematic literature review

### 2. Original language title.

For reviews in languages other than English, this field should be used to enter the title in the language of the review. This will be displayed together with the English language title.

### 3. \* Anticipated or actual start date.

Give the date when the systematic review commenced, or is expected to commence.

21/06/2016

### 4. \* Anticipated completion date.

Give the date by which the review is expected to be completed.

01/12/2017

### 5. \* Stage of review at time of this submission.

Indicate the stage of progress of the review by ticking the relevant Started and Completed boxes. Additional information may be added in the free text box provided.

Please note: Reviews that have progressed beyond the point of completing data extraction at the time of initial registration are not eligible for inclusion in PROSPERO. Should evidence of incorrect status and/or completion date being supplied at the time of submission come to light, the content of the PROSPERO record will be removed leaving only the title and named contact details and a statement that inaccuracies in the stage of the review date had been identified.

This field should be updated when any amendments are made to a published record and on completion and publication of the review.

The review has not yet started: No

## PROSPERO

### International prospective register of systematic reviews

| Review stage                                                    | Started | Completed |
|-----------------------------------------------------------------|---------|-----------|
| Preliminary searches                                            | Yes     | Yes       |
| Piloting of the study selection process                         | Yes     | Yes       |
| Formal screening of search results against eligibility criteria | Yes     | Yes       |
| Data extraction                                                 | Yes     | Yes       |
| Risk of bias (quality) assessment                               | Yes     | Yes       |
| Data analysis                                                   | Yes     | Yes       |

Provide any other relevant information about the stage of the review here (e.g. Funded proposal, protocol not yet finalised).

#### 6. \* Named contact.

The named contact acts as the guarantor for the accuracy of the information presented in the register record.

Negar Pourbordbari

Email salutation (e.g. "Dr Smith" or "Joanne") for correspondence:

#### 7. \* Named contact email.

Give the electronic mail address of the named contact.

negar@dcm.aau.dk

#### 8. Named contact address

Give the full postal address for the named contact.

Dr. Negar Pourbordbari

Research Unit of General Practice in Aalborg and Department of Clinical Medicine, Aalborg University

Fyrkildevej 7, 9220 Aalborg

Denmark

#### 9. Named contact phone number.

Give the telephone number for the named contact, including international dialling code.

004527914224

#### 10. \* Organisational affiliation of the review.

Full title of the organisational affiliations for this review and website address if available. This field may be completed as 'None' if the review is not affiliated to any organisation.

Research Unit of General Practice in Aalborg and Department of Clinical Medicine, Aalborg University,

Denmark

Organisation web address:

#### 11. Review team members and their organisational affiliations.

Give the title, first name, last name and the organisational affiliations of each member of the review team. Affiliation refers to groups or organisations to which review team members belong.

**PROSPERO****International prospective register of systematic reviews**

Dr Negar Pourbordbari. Research Unit of General Practice in Aalborg and Department of Clinical Medicine, Aalborg University, Denmark

Mr Allan Riis. Research Unit of General Practice in Aalborg and Department of Clinical Medicine, Aalborg University, Denmark

Professor Martin Bach Jensen. Research Unit of General Practice in Aalborg and Department of Clinical Medicine, Aalborg University, Denmark

Dr Jens Lykkegaard Olesen. The Faculty of Medicine Department of Clinical Medicine, Aalborg University, Denmark

Dr Michael Skovdal Rathleff. Research Unit of General Practice in Aalborg and Department of Clinical Medicine, Aalborg University, Denmark

**12. \* Funding sources/sponsors.**

Give details of the individuals, organizations, groups or other legal entities who take responsibility for initiating, managing, sponsoring and/or financing the review. Include any unique identification numbers assigned to the review by the individuals or bodies listed.

Research Unit of General Practice in Aalborg and Department of Clinical Medicine, Aalborg University, Denmark

**13. \* Conflicts of interest.**

List any conditions that could lead to actual or perceived undue influence on judgements concerning the main topic investigated in the review.

None

**14. Collaborators.**

Give the name and affiliation of any individuals or organisations who are working on the review but who are not listed as review team members.

**15. \* Review question.**

State the question(s) to be addressed by the review, clearly and precisely. Review questions may be specific or broad. It may be appropriate to break very broad questions down into a series of related more specific questions. Questions may be framed or refined using PI(E)COS where relevant.

The aim of this study is to conduct a systematic review on children and adolescents with musculoskeletal pain with a view to determining which baseline patient characteristics are associated with a poor outcome in follow-up regardless of which treatment has been provided (prognosis) or are associated with a successful outcome to a specific treatment (treatment effect modifiers).

Review question: What are the prognostic factors and treatment effect modifiers for children and adolescents with musculoskeletal pain?

**16. \* Searches.**

Give details of the sources to be searched, search dates (from and to), and any restrictions (e.g. language or publication period). The full search strategy is not required, but may be supplied as a link or attachment.

This systematic review search will be conducted in the following electronic databases: MEDLINE, Embase, CINAHL, Web of Science, Cochrane and SPORTDiscus without limitations on dates.

Articles reported in English, German, Danish, Norwegian, Swedish, French, Spanish, Japanese, Chinese, Thai, Arabic, Persian, Turkish and Hindi will be included.

The search strategy will be divided into seven parts. 1. Pain; 2. Musculoskeletal defined in components; 3. Anatomic regions; 4. Musculoskeletal conditions in general and those common among children and adolescents; 5. Children and adolescents and synonyms; 6. Predictive factors and synonyms; and 7. Final search string to be applied in above mentioned electronic databases and also tested in MEDLINE with 5336 hits.

Additional details about the search strategy can be found in the attached PDF document (link provided

## PROSPERO

### International prospective register of systematic reviews

below).

#### 17. URL to search strategy.

Give a link to the search strategy or an example of a search strategy for a specific database if available (including the keywords that will be used in the search strategies).

[https://www.crd.york.ac.uk/PROSPEROFILES/41378\\_STRATEGY\\_20170613.pdf](https://www.crd.york.ac.uk/PROSPEROFILES/41378_STRATEGY_20170613.pdf)

Alternatively, upload your search strategy to CRD in pdf format. Please note that by doing so you are consenting to the file being made publicly accessible.

Yes I give permission for this file to be made publicly available

#### 18. \* Condition or domain being studied.

Give a short description of the disease, condition or healthcare domain being studied. This could include health and wellbeing outcomes.

Children and adolescents aged 0-19 years with musculoskeletal pain.

#### 19. \* Participants/population.

Give summary criteria for the participants or populations being studied by the review. The preferred format includes details of both inclusion and exclusion criteria.

The participants must all have some form of self-reported musculoskeletal pain at recruitment.

Musculoskeletal pain is defined according to the International Association for the Study of Pain, IASP as: "pain arisen from muscle, tendon, bone and joint. Excluded from the definition is pain due to serious local causes, such as tumors, fractures, or infections, and systemic and neurological causes". Types of pain are named according to the region affected, e.g. back pain, neck pain, shoulder pain, elbow pain, buttock pain, hip pain, knee pain, and ankle pain.

Inclusion criteria: 0 to 19 years of age, self-reported musculoskeletal pain.

Exclusion criteria: Older than 19 years of age.

#### 20. \* Intervention(s), exposure(s).

Give full and clear descriptions or definitions of the nature of the interventions or the exposures to be reviewed.

All interventions used to treat musculoskeletal pain in children and adolescents are eligible, including conservative as well as non-conservative interventions. Conservative intervention is defined as: utilization of non-surgical treatment options, such as, but not limited to, the following: physiotherapy, immobilization, bandaging, drug therapy, wait and see and intraarticular, intramuscular and intratendinous injections with NSAID/glucocorticoid/steroid. We will also include studies that do not contain interventions.

#### 21. \* Comparator(s)/control.

Where relevant, give details of the alternatives against which the main subject/topic of the review will be compared (e.g. another intervention or a non-exposed control group). The preferred format includes details of both inclusion and exclusion criteria.

We expect that most studies will not have used a comparator as they are prospective cohort studies. If the study design is a randomized trial, we will include all types of comparators.

#### 22. \* Types of study to be included.

Give details of the types of study (study designs) eligible for inclusion in the review. If there are no restrictions on the types of study design eligible for inclusion, or certain study types are excluded, this should be stated. The preferred format includes details of both inclusion and exclusion criteria.

Prospective cohort studies (including randomized trials) with a population of children and adolescents aged 0-19 years will be included in this systematic review if they report prognostic factors or treatment effect



## PROSPERO

### International prospective register of systematic reviews

modifiers (e.g. baseline variables that are associated with the outcome).

#### 23. Context.

Give summary details of the setting and other relevant characteristics which help define the inclusion or exclusion criteria.

There will be no restrictions on the type of setting.

#### 24. \* Primary outcome(s).

Give the pre-specified primary (most important) outcomes of the review, including details of how the outcome is defined and measured and when these measurement are made, if these are part of the review inclusion criteria.

We will search for all baseline patient characteristics that are: (i) associated with a poor outcome on follow-up regardless of which treatment has been provided (prognosis); or ii) associated with a successful outcome to a specific treatment (treatment effect modifiers). These may include intrinsic variables (such as age, height, weight, pain intensity, pain duration and similar) or extrinsic variables (such as social status, parental education, sports participation and similar).

#### Timing and effect measures

We will include patient characteristics that are associated with both short- and long-term outcomes. These will be divided into three endpoints, i.e. short-term (3 months), medium-term (3-12 months) and long-term (more than 12 months).

#### 25. \* Secondary outcome(s).

List the pre-specified secondary (additional) outcomes of the review, with a similar level of detail to that required for primary outcomes. Where there are no secondary outcomes please state 'None' or 'Not applicable' as appropriate to the review

The proportion of patients that report themselves free of musculoskeletal pain at follow-up in the included studies.

#### Timing and effect measures

We will include patient characteristics that are associated with both short- and long-term outcomes. These will be divided into three endpoints, i.e. short-term (3 months), medium-term (3-12 months) and long-term (more than 12 months).

#### 26. Data extraction (selection and coding).

Give the procedure for selecting studies for the review and extracting data, including the number of researchers involved and how discrepancies will be resolved. List the data to be extracted.

The process of study selection will be conducted by two reviewers (NP and AR). They will independently identify studies from the electronic database search and will screen the titles and/or abstracts that have relevance to the question: what are the prognostic factors for children and adolescents with musculoskeletal pain? Studies kept after the primary assessment will be screened by full text and then selected for a final inclusion.

Any excluded studies will be recorded, along with a reason for the exclusion. There will be no blinding of the review authors to the journal titles, authors or institutions. Reference lists of all included studies will be screened for additional eligible publications that may have been missed during the initial search.

Any disagreements inside the reviewer group will lead to the involvement of a third reviewer (MSR).

NP will extract data using a pre-defined data extraction form (see Appendix 1 in the full protocol), inspired by The Cochrane Collaboration, Data collection form for intervention reviews: RCTs and non-RCTs (3). All the extracted data will then be validated by a second person (MSR). The collected data will include a description of the participants, setting (e.g. general practice or population-based cohort) and results (including all patient characteristics tested for association with outcome).

## PROSPERO

### International prospective register of systematic reviews

We will contact the corresponding author with a request for information, if any data concerning the intervention or outcome is missing from an included study, the intention being to increase the thoroughness of the descriptions of interventions and outcomes in this study.

Studies examining children and adolescents with musculoskeletal pain aged 0 to 19 years will be included in this review. If a study reports on an age range that exceeds this, we will contact the corresponding author and ask for data on the 0-19 year olds. The requested data will be included if it can be retrieved within one month of the inquiry.

#### 27. \* Risk of bias (quality) assessment.

State whether and how risk of bias will be assessed (including the number of researchers involved and how discrepancies will be resolved), how the quality of individual studies will be assessed, and whether and how this will influence the planned synthesis.

The QUIPS risk of bias tool for prognostic studies will be used to assess the quality of each paper (4). This tool contains items and considerations for six bias domains i.e. study participation, study attrition, prognostic factor measurement, outcome measurement, study confounding, statistical analysis and reporting (see Appendix 2 in full protocol). Each of the six potential bias domains will be rated by NP as high, moderate, or low risk of bias. When assessing the overall risk of bias in each study, a study will be described with a low risk of bias when either a) most of or b) the most important (determined a priori) or c) all of the six bias domains are rated with a low risk of bias. The same applies to moderate and high risk of bias.

#### 28. \* Strategy for data synthesis.

Give the planned general approach to synthesis, e.g. whether aggregate or individual participant data will be used and whether a quantitative or narrative (descriptive) synthesis is planned. It is acceptable to state that a quantitative synthesis will be used if the included studies are sufficiently homogenous.

A narrative synthesis is planned, the reason being the expected substantial heterogeneity in our results. If the prognostic factors or treatment effect modifiers are adequately homogenous, we will conduct a meta-analysis and pool the individual variables.

#### 29. \* Analysis of subgroups or subsets.

Give details of any plans for the separate presentation, exploration or analysis of different types of participants (e.g. by age, disease status, ethnicity, socioeconomic status, presence or absence or co-morbidities); different types of intervention (e.g. drug dose, presence or absence of particular components of intervention); different settings (e.g. country, acute or primary care sector, professional or family care); or different types of study (e.g. randomised or non-randomised).

Data will be divided into two main separate groups: prognostic factors and treatment effect modifiers and then sub-grouped into regions of musculoskeletal pain, gender and age.

#### 30. \* Type and method of review.

Select the type of review and the review method from the lists below. Select the health area(s) of interest for your review.

##### Type of review

Cost effectiveness

No

Diagnostic

No

Epidemiologic

No

Individual patient data (IPD) meta-analysis

No

Intervention

**PROSPERO****International prospective register of systematic reviews**

No

Meta-analysis

No

Methodology

No

Network meta-analysis

No

Pre-clinical

No

Prevention

No

Prognostic

Yes

Prospective meta-analysis (PMA)

No

Qualitative synthesis

No

Review of reviews

No

Service delivery

No

Systematic review

Yes

Other

No

**Health area of the review**

Alcohol/substance misuse/abuse

No

Blood and immune system

No

Cancer

No

Cardiovascular

No

Care of the elderly

No

Child health

No

Complementary therapies

No

Crime and justice

No

Dental

No

Digestive system

No

Ear, nose and throat

No

Education

**PROSPERO****International prospective register of systematic reviews**

No

Endocrine and metabolic disorders

No

Eye disorders

No

General interest

No

Genetics

No

Health inequalities/health equity

No

Infections and infestations

No

International development

No

Mental health and behavioural conditions

No

Musculoskeletal

No

Neurological

No

Nursing

No

Obstetrics and gynaecology

No

Oral health

No

Palliative care

No

Perioperative care

No

Physiotherapy

No

Pregnancy and childbirth

No

Public health (including social determinants of health)

No

Rehabilitation

No

Respiratory disorders

No

Service delivery

No

Skin disorders

No

Social care

No

Surgery

No

Tropical Medicine

No

**PROSPERO****International prospective register of systematic reviews**

Urological

No

Wounds, injuries and accidents

No

Violence and abuse

No

**31. Language.**

Select each language individually to add it to the list below, use the bin icon to remove any added in error.

English

There is an English language summary.

**32. Country.**

Select the country in which the review is being carried out from the drop down list. For multi-national collaborations select all the countries involved.

Denmark

**33. Other registration details.**

Give the name of any organisation where the systematic review title or protocol is registered (such as with The Campbell Collaboration, or The Joanna Briggs Institute) together with any unique identification number assigned. (N.B. Registration details for Cochrane protocols will be automatically entered). If extracted data will be stored and made available through a repository such as the Systematic Review Data Repository (SRDR), details and a link should be included here. If none, leave blank.

**34. Reference and/or URL for published protocol.**

Give the citation and link for the published protocol, if there is one

Give the link to the published protocol.

[http://www.crd.york.ac.uk/PROSPEROFILES/41378\\_PROTOCOL\\_20160520.pdf](http://www.crd.york.ac.uk/PROSPEROFILES/41378_PROTOCOL_20160520.pdf)

Alternatively, upload your published protocol to CRD in pdf format. Please note that by doing so you are consenting to the file being made publicly accessible.

Yes I give permission for this file to be made publicly available

Please note that the information required in the PROSPERO registration form must be completed in full even if access to a protocol is given.

**35. Dissemination plans.**

Give brief details of plans for communicating essential messages from the review to the appropriate audiences.

The manuscript will be submitted for publication in an appropriate peer-reviewed journal. In addition to this we will produce material to be distributed to general practitioners and other health care providers, who manage children and adolescents with musculoskeletal pain. This will be done in the form of a short animation video, visualizing the main study results from the systematic review. The animation will be distributed through social media, websites and patient associations. This will ensure dissemination of our results to our target audience.

**Do you intend to publish the review on completion?**

Yes

## PROSPERO

### International prospective register of systematic reviews

#### 36. Keywords.

Give words or phrases that best describe the review. Separate keywords with a semicolon or new line. Keywords will help users find the review in the Register (the words do not appear in the public record but are included in searches). Be as specific and precise as possible. Avoid acronyms and abbreviations unless these are in wide use.

systematic review  
children  
adolescence  
musculoskeletal pain  
prognosis  
treatment effect modifier

#### 37. Details of any existing review of the same topic by the same authors.

Give details of earlier versions of the systematic review if an update of an existing review is being registered, including full bibliographic reference if possible.

#### 38. \* Current review status.

Review status should be updated when the review is completed and when it is published. Please provide anticipated publication date

Review\_Ongoing

#### 39. Any additional information.

Provide any other information the review team feel is relevant to the registration of the review.

References:

1. [http://www.iasp-pain.org/files/Content/ContentFolders/GlobalYearAgainstPain2/MusculoskeletalPainFactSheets/AcutePain\\_Final.pdf](http://www.iasp-pain.org/files/Content/ContentFolders/GlobalYearAgainstPain2/MusculoskeletalPainFactSheets/AcutePain_Final.pdf)
2. <http://www.spine-health.com/glossary/conservative-treatment>.
3. Cochrane Training, Data collection form for intervention reviews: RCTs and non-RCTs. <http://training.cochrane.org/resource/data-collection-forms-intervention-reviews> 2014.
4. Hayden JA, van der Windt DA, Cartwright JL, Côté P, Bombardier C. Assessing bias in studies of prognostic factors. *Ann Intern Med*. 2013;158(4):280-6.

#### 40. Details of final report/publication(s).

This field should be left empty until details of the completed review are available.

Give the link to the published review.

# BMJ Open

## Poor prognosis of child and adolescent Musculoskeletal Pain - a Systematic Literature Review

|                                                                                                                                                         |                                                                                                                                                                                                                                                                                                                                                                                                                                                                                                                                                                                                   |
|---------------------------------------------------------------------------------------------------------------------------------------------------------|---------------------------------------------------------------------------------------------------------------------------------------------------------------------------------------------------------------------------------------------------------------------------------------------------------------------------------------------------------------------------------------------------------------------------------------------------------------------------------------------------------------------------------------------------------------------------------------------------|
| Journal:                                                                                                                                                | <i>BMJ Open</i>                                                                                                                                                                                                                                                                                                                                                                                                                                                                                                                                                                                   |
| Manuscript ID                                                                                                                                           | bmjopen-2018-024921.R1                                                                                                                                                                                                                                                                                                                                                                                                                                                                                                                                                                            |
| Article Type:                                                                                                                                           | Research                                                                                                                                                                                                                                                                                                                                                                                                                                                                                                                                                                                          |
| Date Submitted by the Author:                                                                                                                           | 02-Apr-2019                                                                                                                                                                                                                                                                                                                                                                                                                                                                                                                                                                                       |
| Complete List of Authors:                                                                                                                               | Pourbordbari, Negar; Research unit for general practice in Aalborg Denmark, Clinical medicine<br>Riis, Allan; Department of Clinical Medicine at Aalborg University, Research Unit for General Practice in Aalborg<br>Jensen, Martin Bach; Department of Clinical Medicine at Aalborg University, Research Unit for General Practice in Aalborg<br>Olesen, Jens; Department of Clinical Medicine at Aalborg University, Research Unit for General Practice in Aalborg<br>Rathleff, Michael ; Department of Clinical Medicine at Aalborg University, Research Unit for General Practice in Aalborg |
| <b>Primary Subject Heading</b>:                                                                                                                         | General practice / Family practice                                                                                                                                                                                                                                                                                                                                                                                                                                                                                                                                                                |
| Secondary Subject Heading:                                                                                                                              | Medical management                                                                                                                                                                                                                                                                                                                                                                                                                                                                                                                                                                                |
| Keywords:                                                                                                                                               | musculoskeletal pain, adolescents, children, prognosis, general practice                                                                                                                                                                                                                                                                                                                                                                                                                                                                                                                          |
| Note: The following files were submitted by the author for peer review, but cannot be converted to PDF. You must view these files (e.g. movies) online. |                                                                                                                                                                                                                                                                                                                                                                                                                                                                                                                                                                                                   |
| Systematic-review-animation-final.mp4                                                                                                                   |                                                                                                                                                                                                                                                                                                                                                                                                                                                                                                                                                                                                   |

SCHOLARONE™  
Manuscripts

1  
2  
3  
4  
5  
6  
7  
8  
9  
10  
11  
12  
13  
14  
15  
16  
17  
18  
19  
20  
21  
22  
23  
24  
25  
26  
27  
28  
29  
30  
31  
32  
33  
34  
35  
36  
37  
38  
39  
40  
41  
42  
43  
44  
45  
46  
47  
48  
49  
50  
51  
52  
53  
54  
55  
56  
57  
58  
59  
60

## Poor prognosis of child and adolescent Musculoskeletal Pain - a Systematic Literature Review

### Authors

Pourbordbari N<sup>1</sup>, Riis A<sup>1</sup>, Jensen MB<sup>1</sup>, Olesen JL<sup>1</sup>, Rathleff MS<sup>1</sup>

### Affiliation:

Research Unit for General Practice in Aalborg,  
Department of Clinical Medicine,  
Aalborg University,  
Denmark.

### Authors and contact information

Corresponding author Negar Pourbordbari MD,  
Research Unit for General Practice in Aalborg,  
Department of Clinical Medicine,  
Aalborg University,  
Denmark.

Email: [negar@dcm.aau.dk](mailto:negar@dcm.aau.dk).



## Abstract

### Objectives

To identify baseline patient characteristics that are: (i) associated with a poor outcome on follow up regardless of which treatment was provided (prognosis); or (ii) associated with a successful outcome to a specific treatment (treatment effect modifiers).

### Design

Systematic literature review according to Preferred Reporting Items for Systematic Reviews and Meta-Analysis guidelines.

### Data sources

Medline, Embase, Cinahl, Web of Science, Cochrane, SportDiscus, OT Seeker, and PsychInfo were searched for prospective cohort studies up to February 2019 without limitation in publication date.

### Eligibility criteria

Prospective cohort studies reporting either prognostic factors or treatment effect modifiers on persistent musculoskeletal pain in 0- to 19-year-old children and adolescents. Pain caused by tumours, fractures, infections, systemic and neurological conditions were excluded.

### Outcome measures

Our primary outcome was musculoskeletal pain at follow-up and identification of any baseline characteristics that were associated with this outcome (prognostic factors). No secondary outcomes were declared.

### Method

Two reviewers independently screened abstracts and titles. We included prospective cohort studies investigating the prognosis or treatment effect modifiers of 0- to 19-year-old children and adolescents with self-reported musculoskeletal pain. Risk of bias assessment was conducted with the QUIPS tool.

### Results

Twenty-six studies yielding a total of 111 unique prognostic factors were included. Female sex and psychological symptoms were the most frequent investigated prognostic factors. Increasing age, generalised pain, longer pain duration, and smoking were other identified prognostic factors. No treatment effect modifiers were identified.

### Conclusion

Several prognostic factors are associated with a poor prognosis in children and adolescents with musculoskeletal pain. These prognostic factors may help guide clinical practice and shared decision-making. None of the included studies was conducted within a general practice setting which highlights an area in need of research.

### Registration

The protocol for this review was developed using the PRISMA-P 2015 statement, inspired by the Cochrane Central Register of Controlled Trials, and registered prospectively in the International Prospective Register of Systematic Reviews (PROSPERO, ID: CRD42016041378).

### Strengths and limitations of this study

- This review is highly updated with a search up to February 2019.
- No previous review has aimed to identify prognostic factors in children and adolescents with musculoskeletal pain with the purpose of informing clinical practice.
- In collaboration with a research librarian a highly sensitive search for each of the eight databases was developed to ensure an inclusion of the totality of previous research.
- Two reviewers independently carried out the screening and data extraction was executed in the same manner for all included studies.
- No meta-analysis was conducted due to a heterogeneity of patient population, setting, and endpoints.

### Keywords

musculoskeletal pain; adolescents; children; prognosis; general practice

## Introduction

General practice is often the point of first contact into the health care system and musculoskeletal pain complaints are the most common cause of contact. The case workload due to musculoskeletal pain complaints in children and adolescents is estimated to be 4-8% of the UK general practice (1) and musculoskeletal pain is known to affect half of all children and adolescents, increasing exponentially in frequency around the age of 10 (2-6). A recent systematic review reported that 40% of an adolescent population had experienced pain during the past six months (3). The most common pain sites are the knee and back (7). Musculoskeletal pain has a detrimental impact on the adolescents' quality of life and may cause them to withdraw from school, social, and athletic activities (8, 9).

Musculoskeletal pain in children and adolescents has previously been considered a self-limiting condition without long-term impact (10). Recent cohort studies show that 16-32% of patients with knee pain still report knee pain one year later (10, 11) and that 21% of 12-35-year-olds had persistent knee pain six years after initial contact to their general practitioner (10). Collectively, these studies highlight that a significant proportion of adolescents will report pain even years later. Who are the children and adolescents with a particularly high risk of long-lasting musculoskeletal pain? This is one of the most common questions from our stakeholder interviews with general practitioners [*unpublished stakeholder event*].

Knowledge of prognostic factors can inform the general practitioner of the prognosis of their patients and enable them to identify those with a poor prognosis to stratify care, address modifiable risk factors and better understand chronic pain conditions. The latest systematic review on prognostic factors for adolescents with musculoskeletal pain (12) ended their literature search in July 2015 which makes for a timely update. So far, no systematic reviews have aimed to inform clinical practice of prognostic factors in children, and adolescents with musculoskeletal pain. Therefore, we aimed to identify baseline patient characteristics associated with a (i) poor outcome on follow-up (prognosis) or (ii) successful outcome of a treatment (treatment effect modifiers).

## Methods

### Literature search

We searched in Medline, Embase, Cinahl, Web of Science, Cochrane, SportDiscus, OT Seeker, and PsychInfo from their inception until February 2019 without limitation on date. An experienced research librarian collaborated in the production of individual search strategies for each of the eight databases (Appendix 1).

### Eligibility criteria

#### **Study population and design**

We included prospective studies that investigated prognostic factors or treatment effect modifiers in children and adolescents 0- to 19-years-old, with any type and location of musculoskeletal pain. Musculoskeletal pain was defined as pain in muscle, tendon, bone, and joint (13). We included musculoskeletal pain types, reported in each of our included studies, without further definition of or changes in the designations chosen by the respective authors. We excluded pain knowingly caused by tumours, fractures, infections, systemic and neurological conditions, and stomach pain, because of insufficient differentiation between musculoskeletal stomach pain and stomach pain by other causes. Furthermore, we included all prospective studies, independent of intervention and randomised trials including all types of comparators. As expected, most studies did not use a comparator because they were prospective cohort studies. Similar to intervention, these studies were included independent of comparators. There were no restrictions on the type of setting or language.

#### **Review process**

Two reviewers (NP and AR) independently screened titles and abstracts for studies addressing the question: What are the prognostic factors and treatment effect modifiers for children and adolescents with musculoskeletal pain? Full-text articles were then screened, adding primary reasons for exclusion.

There was no blinding of the review authors to the journal titles, authors, or institutions. Reference lists of all included studies were screened for eligible publications that may have been missed during the initial search.

1  
2  
3  
4 The study selection process was finalised without any disagreements on included studies. EndNote was used  
5 to remove duplicates and NP manually checked for duplicates afterwards.  
6

### 7 **Data extraction**

8 Data for the included studies were extracted by NP in the form of: *study characteristics* (study design,  
9 recruitment setting, and duration of follow-up), *participant characteristics* (musculoskeletal pain type,  
10 baseline age, study population, and persistent pain at follow-up in females, males, and combined) (Table 1),  
11 and *prognostic factors* with their reported estimates: odds ratios (OR), relative risks (RR), (95% confidence  
12 intervals (95%CI)), and/or P-values. If possible, we extracted the adjusted associations.  
13

14 Data were extracted with a pre-defined data extraction form inspired by The Cochrane Collaboration (14).  
15

### 16 **Outcomes and endpoints**

17 Our primary outcome of interest was musculoskeletal pain at follow-up. We wanted to identify any baseline  
18 characteristics that were associated with this outcome (prognostic factors). We used the term “pain persistence”  
19 to describe participants who had pain at both baseline and follow-up, without applying restrictions on either  
20 pain measurement or on follow-up time points.  
21

### 22 **Risk of bias**

23 Risk of bias was assessed using the Quality in Prognostic Studies (QUIPS) tool (15). On the study level, NP  
24 and AR independently rated the 26 included studies and reached consensus on all risk of bias assessments  
25 (Table 2). Prognostic factors from studies with a high risk of bias, were excluded from Figure 1.  
26

### 27 **Involvement of general practitioners**

28 With stakeholder involvement and input from a panel of general practice researchers experienced in  
29 musculoskeletal research, we sub-grouped our identified prognostic factors in accordance with the  
30 biopsychosocial model (16, 17):  
31

#### 32 Biological prognostic factors:

- 33 -Female sex
- 34 -Older age
- 35 -Body measurement factors
- 36 -Physical functioning
- 37 -Pain characteristics
- 38
- 39

#### 40 Psychological prognostic factors

- 41 -General psychological factors
- 42 -Depressive factors
- 43

#### 44 Social prognostic factors:

- 45 -General social factors
- 46 -Factors related to sleep/daytime tiredness
- 47 -Physical activity/inactivity
- 48 -Alcohol
- 49 -Smoking
- 50

### 51 **Reporting of results**

52 We were not able to conduct our a priori planned meta-analysis because of heterogeneity in terms of patient  
53 population, setting, and time points for follow-up. The evidence on included prognostic factors was reported  
54 with odds ratios (OR), relative risks (RR), and/or P-values. As OR and RR may differ in interpretation, we  
55 reported them separately. A statistically significant association between a patient characteristic and an outcome  
56 was defined as an RR or OR above or below 1 that did not include 1 in the 95% confidence interval. As for P-  
57 value, a statistically significant association was defined as  $P < 0.05$ . Average on pain at follow-up was  
58  
59  
60

calculated as average of individual studies reporting same musculoskeletal pain type at same follow-up duration (Figure 2).

We used the PRISMA checklist when writing our report (18) (Appendix 2).

### Patient involvement

No patients or public were involved in the present study.

## RESULTS

### Included studies

Figure 3 reports the results of the search strategy. Of the 48,538 titles identified, 41,735 studies were screened, and 26 studies (9, 11, 17, 19-41) were included. All included studies were prospective studies. The included studies used a mix of different measures to capture pain at follow-up. Musculoskeletal pain types included in our search were: general musculoskeletal pain, neck, back, lower back, lower limb, knee, and growing pain. No treatment effect modifiers were identified.

**Table 1** Included studies described by musculoskeletal pain type, baseline age, size of study population, and follow-up.

| Study (reference)   | MSK pain type           | Baseline age (years) | Recruitment setting | Study population (n) | Follow-up (years) | Persistent pain at follow-up Female (%) | Persistent pain at follow-up Male (%) | Persistent pain at follow-up combined (%) |
|---------------------|-------------------------|----------------------|---------------------|----------------------|-------------------|-----------------------------------------|---------------------------------------|-------------------------------------------|
| Blaauw (19)         | Headache                | 12 - 16              | School              | 1586                 | 4                 | 45.7                                    | 22.7                                  | 35.1                                      |
| Brattberg 93 (20)   | Back, Head              | 8, 11, 13            | School              | 471                  | 2                 | Back 15<br>Head 40                      | Back 4<br>Head 20                     | Back 9.3<br>Head 30.7                     |
| Brattberg 04 (21)   | General MSK             | 10, 13, 16           | School              | 597                  | 11                | 59                                      | 39                                    | 20                                        |
| El-Metwally 04 (22) | General MSK             | 9 - 12               | School              | 1756                 | 1 and 4           | 4 years: 56.2                           | 4 years: 43.8                         | 1 years: 53.8<br>4 years: 63.5            |
| El-Metwally 05 (11) | Lower limb              | 9 - 12               | School              | 1756                 | 1 and 4           | 1 year: 29.4<br>4 years: 31.9           | 1 year: 55.8<br>4 years: 48.6         | 1 year: 32<br>4 years: 31                 |
| Flato (23)          | General MSK             | 2 - 17               | Clinical            | 37                   | 9                 | 13                                      | N/A                                   | 59                                        |
| Holley (24)         | General MSK             | 10 - 17              | Clinical            | 88                   | 3 months          | 87.1                                    | 12.9                                  | 35.2                                      |
| Jones (25)          | Low back                | 11 - 14              | School              | 330                  | 4                 | N/A                                     | N/A                                   | 26                                        |
| Jussila (26)        | General MSK             | 16 - 18              | Community           | 1773                 | 2                 | N/A                                     | N/A                                   | N/A                                       |
| Laimi (27)          | Headache <sup>a</sup>   | 13                   | School              | 311                  | 3                 | 54                                      | 70.5                                  | 48                                        |
| Lunde (28)          | Low back                | 15 - 19              | School              | 420                  | 6.5               | N/A                                     | N/A                                   | 39                                        |
| Mikkelsen 97 (29)   | Neck, WSP, low back     | 9 - 12               | School              | 1756                 | 1                 | N/A                                     | N/A                                   | Neck 48.3<br>WSP 29.7<br>Low back 34.4    |
| Mikkelsen 98 (30)   | General MSK             | 9 - 12               | School              | 1756                 | 1                 | N/A                                     | N/A                                   | 52.9                                      |
| Mikkelsen 99 (31)   | Neck, WSP               | 9 - 12               | School              | 464                  | 1                 | Neck 70.4<br>WSP 62.5                   | Neck 41<br>WSP 62.5                   | Neck 58.1<br>WSP 62.5                     |
| Mikkonen 08 (32)    | Low back                | 16                   | Community           | 2969                 | 2                 | N/A                                     | N/A                                   | 27.1                                      |
| Mikkonen 11 (33)    | Low back                | 16                   | Community           | 728                  | 2                 | 53                                      | 46                                    | 50.4                                      |
| Mikkonen 13 (34)    | Low back                | 7 - 19               | Community           | 1660                 | 2 and 3           | 2 years: 68<br>3 years: 63              | 2 years: 62<br>3 years: 47            | N/A                                       |
| Paananen (35)       | General MSK             | 16                   | Community           | 1594                 | 2                 | N/A                                     | 75                                    | 88                                        |
| Rathleff (9)        | Knee                    | 12 - 15              | School              | 768                  | 1                 | N/A                                     | N/A                                   | 48.8                                      |
| Rathleff 16 (36)    | Knee                    | 16 - 18              | School              | 504                  | 2                 | N/A                                     | N/A                                   | 55.9                                      |
| Rathleff 16 (37)    | Knee (PFP)              | 15 - 19              | School              | 121                  | 3 months          | N/A                                     | N/A                                   | 74.4                                      |
| Sjolie (38)         | Low back                | 14 - 16              | Community           | 88                   | 3                 | N/A                                     | N/A                                   | 39                                        |
| Sperotto (39)       | General MSK             | 8 - 13               | School              | 289                  | 3                 | N/A                                     | N/A                                   | 54.3                                      |
| Stanford (17)       | Head, Back, Stomachache | 10 - 11              | Community           | 2488 <sup>b</sup>    | 2                 | N/A                                     | N/A                                   | Head 29<br>Back 21.7                      |
| Stahl (40)          | Neck                    | 9 - 12               | School              | 1756                 | 1 and 4           | N/A                                     | N/A                                   | 1 year: 48.2<br>4 years: 33.5             |
| Uziel (41)          | Growing pain            | 10 - 16              | Clinical            | 35                   | 5                 | N/A                                     | N/A                                   | 48.6                                      |

MSK = Musculoskeletal

N/A = not applicable

A = Headache: non migrainous

WSP = Widespread pain

b = included stomachache participants

1  
2  
3  
4 **Extracted data from the included studies: MSK pain type, baseline age, recruitment setting, size of study**  
5 **population, follow-up and percentage of study participants who represented persistent pain at follow-up, -both**  
6 **stratified by gender and combined.**  
7

### 8 Risk of bias

9 The most common reasons for a moderate or high risk of bias were inadequately described study participation  
10 and statistical analyses (n=6, 23%), attrition rates (n=5, 20%), and poor adjustment for confounders (n=11,  
11 42%). Three studies were rated with high risk of bias. With the purpose of filtering the results of prognostic  
12 factors, we excluded these studies from the final results depicted in Figure 1.  
13

14 **Table 2** Risk of bias in included studies. With the Quality in Prognostic Studies (QUIPS) tool studies were assessed on  
15 the overall risk of bias within each of the six domains and rated as low, moderate or high risk of bias.  
16

| 17 Study author year   | 18 Design                                            | 19 Study participation | 20 Study attrition | 21 Prognostic factor measurement | 22 Outcome measurement | 23 Study confounding | 24 Statistical analysis and presentation |
|------------------------|------------------------------------------------------|------------------------|--------------------|----------------------------------|------------------------|----------------------|------------------------------------------|
| Blauuw et al 2015      | Prospective cohort                                   | Low                    | Moderate           | Low                              | Low                    | Moderate             | Low                                      |
| Brattberg et al 1993   | Prospective cohort                                   | Moderate               | Moderate           | Low                              | Low                    | Moderate             | High                                     |
| Brattberg et al 2004   | Prospective cohort                                   | Low                    | Moderate           | Low                              | Low                    | Low                  | Low                                      |
| El-Metwally et al 2004 | Prospective cohort                                   | Low                    | Low                | Low                              | Low                    | Low                  | Low                                      |
| El-Metwally et al 2005 | Prospective cohort                                   | Low                    | Low                | Low                              | Low                    | Low                  | Low                                      |
| Flato et al 1997       | Prospective cohort                                   | Low                    | Low                | Low                              | Low                    | Low                  | Low                                      |
| Holley et al 2017      | Prospective cohort                                   | Low                    | Low                | Low                              | Low                    | Low                  | Low                                      |
| Jones et al 2009       | Prospective cohort                                   | Low                    | Moderate           | Low                              | Low                    | Low                  | Low                                      |
| Jussila et al 2014     | Prospective cohort                                   | Low                    | Moderate           | Low                              | Low                    | Low                  | Low                                      |
| Laimi et al 2007       | Prospective cohort                                   | Low                    | Moderate           | Low                              | Low                    | Low                  | Low                                      |
| Lunde et al 2015       | Prospective cohort                                   | Low                    | Moderate           | Low                              | Low                    | Low                  | Low                                      |
| Mikkelsen et al 1997   | Prospective cohort                                   | Low                    | Low                | Low                              | Low                    | Moderate             | Moderate                                 |
| Mikkelsen et al 1998   | Prospective cohort                                   | Low                    | Low                | Low                              | Low                    | Low                  | Moderate                                 |
| Mikkelsen et al 1999   | Prospective cohort                                   | Low                    | Low                | Low                              | Low                    | Low                  | Low                                      |
| Mikkonen et al 2008    | Prospective cohort                                   | Low                    | Moderate           | Low                              | Low                    | Low                  | Low                                      |
| Mikkonen et al 2012    | Prospective cohort                                   | Moderate               | Low                | Low                              | Low                    | Low                  | Low                                      |
| Mikkonen et al 2013    | Prospective cohort                                   | Low                    | Moderate           | Low                              | Low                    | Low                  | Low                                      |
| Paananen et al 2010    | Prospective cohort                                   | Low                    | Moderate           | Low                              | Low                    | Low                  | Low                                      |
| Rathleff et al 2013    | Prospective cohort and nested case-control           | Moderate               | Low                | Low                              | Low                    | Low                  | Low                                      |
| Rathleff et al 2016*   | Prospective cohort                                   | Low                    | Low                | Low                              | Low                    | Low                  | Low                                      |
| Rathleff et al 2016    | Prospective cohort                                   | Low                    | Low                | Low                              | Low                    | Low                  | Low                                      |
| Sjolie et al 2001      | Prospective cohort study with a cross sectional part | Low                    | Low                | Low                              | Low                    | Low                  | Low                                      |
| Sperotto et al 2015    | Prospective cohort                                   | Low                    | Moderate           | Low                              | Low                    | High                 | Moderate                                 |
| Stanford et al 2007    | Prospective cohort                                   | Low                    | Moderate           | Low                              | Low                    | Low                  | Low                                      |
| Stähl et al 2008       | Prospective cohort                                   | Low                    | Moderate           | Low                              | Low                    | Moderate             | Low                                      |
| Uziel et al 2010       | Prospective cohort                                   | Moderate               | Low                | Low                              | Low                    | High                 | Moderate                                 |

25 \*"Is knee pain during adolescence a self-limiting condition?"

26 **Risk of bias in included studies. With the Quality in Prognostic Studies (QUIPS) tool studies were assessed on the**  
27 **overall risk of bias within each of the six domains and rated as low, moderate or high risk of bias. Three studies**  
28 **were rated with high risk of bias, and hence excluded from the final results.**  
29

### 30 Prognosis

31 Figure 2 highlights the persistence of musculoskeletal pain in all included studies at different follow-up time  
32 points and is calculated based on persistent pain at follow-up in Table 1.  
33

34 At one-year follow-up, an average of 54,4% with general musculoskeletal pain, an average of 41,8% with neck  
35 pain, and 48,8% with knee pain reported pain. At four-year follow-up 63,5% with general musculoskeletal  
36 pain, 33,5% with neck pain, and 26% with low back pain reported pain. At nine-year follow-up 59% with  
37 general musculoskeletal pain reported pain. A complete report of all the identified prognostic factors is listed  
38 in Supplementary Table 1. Figure 1 depicts the majority of these prognostic factors, stratified by pain type,  
39 sex, study population size, and follow-up (please see Supplemental Table 1 for explanatory notes).  
40

41 Very few prognostic factors were reported on back pain, growing pain, lower limb pain, and widespread  
42 musculoskeletal pain (Supplementary Table 1); consequently, they were excluded from Figure 1. Table 3  
43

condenses the results from Supplementary Table 1 and highlights four prognostic factors on four different musculoskeletal pain types. Below each factor are suggestive questions to provide the general practitioner with insight into the patient's prognosis. Table 3 and Figure 1 can be printed and used by a general practitioner at time of initial consultation with a 0-19-year-old patient with musculoskeletal pain.

Please see the Supplementary file – video for an animation showing how our findings can be used in a clinical setting.

**Table 3** What to ask in clinical practice? 4 prognostic factors belonging to 4 frequent musculoskeletal pain types in general practice: General musculoskeletal-, Low back-, Neck-, and Knee Pain.

The questions are proposals towards assessment of prognosis on musculoskeletal pain.

|                           | General musculoskeletal pain                                                                                    | Low back pain                                                                                                               | Neck pain                                                                                                                           | Knee pain                                                                                                           |
|---------------------------|-----------------------------------------------------------------------------------------------------------------|-----------------------------------------------------------------------------------------------------------------------------|-------------------------------------------------------------------------------------------------------------------------------------|---------------------------------------------------------------------------------------------------------------------|
| <b>Prognostic factors</b> | -Female sex and female smokers<br>-Day tiredness/fatigue<br>-Physical activity vs. none<br>-Depressive symptoms | -Higher lumbar mobility(a)<br>-Longer pain duration<br>-Peer problems<br>-Smoking                                           | -Female sex<br>-Depressive symptoms<br>-Multisite pain vs. localized<br>-Day tiredness                                              | -Increasing age<br>-Daily pain<br>-Sport > 2t/week<br>-Low quality of life                                          |
| <b>Questions</b>          | -Do you smoke?(F)<br>-Do you feel tired during the day?<br>-Do you do sport?<br>-Are you feeling mentally well? | -Clinical examination<br>-How long have you had pain?<br>-Do you have friends/do you experience bullying?<br>-Do you smoke? | -Are you feeling mentally well?<br>-Do you have pain in more than one musculoskeletal region?<br>-Do you feel tired during the day? | -Do you experience daily pain<br>-Do you do practice sport frequently?<br>-How are things at school and at home?(b) |

*a = to be evaluated by clinical examination*

*b = this question is a suggestion for use in evaluation of quality of life*

*F Female patients*

### Prognostic factors associated with pain at follow-up

A total of 111 prognostic factors were associated with musculoskeletal pain at follow-up, of which most were on general musculoskeletal pain and low back pain (Table 3). Supplementary table 1 includes these results and further detailed depiction of prognostic factors.

Female sex was the most frequently identified prognostic factor associated with musculoskeletal pain at follow-up. Eleven studies identified psychological factors (e.g. depression, anxiety, and low self-esteem) to be associated with pain at follow-up in seven out of nine musculoskeletal pain types (9, 17, 19, 21, 22, 25, 26, 30, 35, 36, 40).

Longer pain duration was associated with pain at follow-up across four musculoskeletal pain types: musculoskeletal, low back, knee, and back pain (21, 23, 25, 36).

Five studies identified sleep-related problems associated with outcome (22, 26, 30, 35, 40).

Other indicators for musculoskeletal pain at follow-up were increasing age (9, 22, 27, 30), smoking (32, 35), parental pain (17, 23, 41), and multisite pain (22, 23, 40).

Figure 1 summarises all identified prognostic factors for musculoskeletal pain at follow-up, stratified by pain type, study population size, sex, and follow-up.

### Non-significant prognostic factors

We identified a total of 134 patient characteristics across nine musculoskeletal pain types and different follow-up time points with a non-significant association with musculoskeletal pain at follow-up (Supplementary Table 1).

1  
2  
3  
4 Increasing age (11, 21, 23, 28, 29, 31, 36, 41) was the most frequently identified baseline factor with a non-  
5 significant association to musculoskeletal pain at follow-up. Multiple studies reported non-significant evidence  
6 on higher body mass index (23, 26, 28) and hypermobility (11, 30, 40).  
7

## 8 **DISCUSSION**

### 9 **Principal findings**

10 Female sex was consistently associated with an increased risk (OR and RR between 1.24 and 3.66) of pain at  
11 follow-up across six different musculoskeletal pain types. Depressive symptoms (9, 17, 19, 22, 24, 26, 30, 35,  
12 36, 40), factors related to sleep/daytime tiredness (22, 26, 30, 35, 40), and parental pain condition (17, 23, 41)  
13 were all associated with a higher risk of pain at follow-up. Collectively, the identified studies included  
14 prognostic factors across all aspects of the biopsychosocial model, despite a main focus on biological factors.  
15 Increasing age was identified as both a significant and a non-significant prognostic factor in the included  
16 studies. This conflicting finding reflects the uncertainty surrounding the importance of age as a prognostic  
17 factor. A complete overview of strength of associations can be found in Supplementary Table 1.  
18  
19

### 20 **Strengths and limitations in comparison with existing literature**

21 The latest systematic review on prognostic factors for children and adolescents with musculoskeletal pain  
22 ended their search in July 2015 which makes for a timely update (12). In addition to adding newer studies, our  
23 review differs from the previous with search in more databases, no restriction on publication language, and no  
24 restriction on pain duration (41). Furthermore, this review is highly updated with a search up to February 2019  
25 and the protocol for this review was developed using the PRISMA-P 2015 statement (Appendix 3). Despite  
26 methodology differences, we did not identify additional studies from inception to 2015, but identified three  
27 new studies from January 2016 to 2017. These studies added important knowledge of female sex, pain  
28 frequency, and the prognosis of knee pain and general musculoskeletal pain. Thereby, supporting the previous  
29 research. Despite the commonality of children and adolescents with musculoskeletal pain in general practice  
30 (6), we did not identify a single study with a population of children or adolescents recruited from general  
31 practice.  
32

33 A previous review on prognostic factors for adults with musculoskeletal pain in primary care was published  
34 in 2017 (42) with findings similar to ours i.e., female gender, older age, depression/anxiety, and long pain  
35 duration was found associated with an increased risk of musculoskeletal pain at follow-up. This suggest that  
36 some of the prognostic factors function well across the age range and their use is not isolated to specific age  
37 groups.  
38

### 39 **Explanation of findings and implications for clinical practice**

40 Our findings suggest that females are at higher risk of persistent pain. Previous research highlights potential  
41 sex differences in pain responses by assessing pain intensity and threshold and conclude that females display  
42 greater sensitivity to multiple pain modalities compared with males (43). Importantly, pain-coping strategies  
43 have been found to differ between the sexes (44, 45). Females make use of social support, cognitive  
44 reinterpretation, and positive self-statements, while males use behavioural distraction and problem-focused  
45 tactics to manage pain. This could partly explain the sex-difference in prognosis and may open new  
46 opportunities for targeted treatment to improve long-term outcomes of young females with musculoskeletal  
47 pain.  
48

49 The current results point towards both modifiable (psychological factors, smoking, and peer problems) and  
50 non-modifiable (sex, age, and pain duration) factors associated with prognosis. Despite time constraints in  
51 general practice, most of these factors can be extracted from electronic stored patient data, psychometric tests,  
52 and examination in a clinical general practice setting.

53 By asking your patient a few questions at the first consultation of musculoskeletal pain, the general practitioner  
54 may improve their understanding of their patients` risk of pain in the future. In the case of a present, baseline  
55 factor with a poor prognosis e.g. smoking among low back pain patients, the general practitioner now both has  
56 a scientific reason for and the clinical tool to modulate this factor. By prescribing cessation of smoking, thus,  
57 making an effort to improve the outcome for this patient.

58 Treatment of musculoskeletal pain requires the general practitioner to apply a multifactorial rather than a  
59 single-factor approach, hence, including the entire person and their life-circumstances when treating patients  
60

with pain (16, 46, 47). Clinicians must be aware of the multifactorial aetiology and consider biological-, psychological-, and social factors of musculoskeletal pain when addressing patient's coping behaviour and cognitive appraisal (48).

### **Implications for future research**

Most of our included studies investigated biological prognostic factors (54 factors). Fewer investigated social (35 factors) and even fewer psychological prognostic factors (22 factors). Future research should include the entire patient, in terms of biological, psychological, and social-related components and aim to study these prognostic factors in a general practice setting. There is a dearth of knowledge of how psycho-social factors are associated with prognosis and how general practitioners can harness this information to tailor treatment and information to their patients. Despite the potential importance of pain, "who" the patient is should not be discounted. Geographical location of home, parental -pain, -profession and -income, and social identity in terms of cultural differences, religious beliefs, and relations could be important because we know from the biopsychosocial model that social background is important in relation to pain coping.

Only one study did follow-up after 4, 6.5, 9, and 11 years, respectively, which highlights the lack of long-term cohort studies on prognosis and impact of musculoskeletal pain in youth.

Almost one in every two children and adolescents still reported pain even years later (10, 11, 49). This highlights the importance of prognosis of pain in children and adolescents. Health care practitioners should be cognisant not to assume that musculoskeletal pain during childhood or adolescence is transient or self-limiting.

### **Supplementary information**

Additional information accompanies this paper in the form of Figure 1: Prognostic factors for persistent musculoskeletal pain, according to pain type, population size, sex, follow-up, and the biopsychosocial model, Figure 2: Persistent musculoskeletal pain, stratified by pain type and follow-up: The included studies investigated pain at follow-up time points ranging from 3 months to 11 years. General musculoskeletal pain persisted in above 50% of participants with general musculoskeletal pain after 1, 2, 3, 4, and 9 years follow-up, Figure 3: PRISMA Flow chart presenting the flow of citations reviewed in the course of the systematic review: 48,538 articles were identified through search in eight databases, resulting in 223 articles for full-text eligibility screen and a final number of 26 studies for inclusion yielding 111 prognostic factors on musculoskeletal pain, Appendix 1: Search string, Appendix 2: Completed PRISMA checklist, Appendix 3: Protocol, and Supplementary Table 1: Estimates on prognostic factors specified according to musculoskeletal pain type, baseline age, and follow-up in the included studies, and an animation showing how our findings can be used in a clinical setting, see the Supplementary file: <https://youtu.be/raltzsgkTHc>

### **Author contributions**

NP conducted the systematic literature search. NP and AR independently carried out the screening, study inclusion, and study bias assessment. NP and MSR led writing of both the protocol and manuscript and all authors NP, AR, MSR, MBJ, and JLO contributed with important reflections and revisions to both.

### **Funding**

This work was supported by The Research Unit for General Practice in Aalborg, Denmark, without any further funders.

### **Ethical approval**

Not applicable.

### **Competing interests**

The authors have declared no competing interests.

### **Data sharing statement**

All data and results presented within this systematic review can be obtained, on reasonable request, by contacting the corresponding author.



1  
2  
3  
4  
5  
6  
7  
8  
9  
10  
11  
12  
13  
14  
15  
16  
17  
18  
19  
20  
21  
22  
23  
24  
25  
26  
27  
28  
29  
30  
31  
32  
33  
34  
35  
36  
37  
38  
39  
40  
41  
42  
43  
44  
45  
46  
47  
48  
49  
50  
51  
52  
53  
54  
55  
56  
57  
58  
59  
60

For peer review only

## References

1. Michaleff ZA, Campbell P, Protheroe J, Rajani A, Dunn KM. Consultation patterns of children and adolescents with knee pain in UK general practice: analysis of medical records. *BMC Musculoskelet Disord*. 2017;18(1):239.
2. Hofel L, Draheim N, Hafner R, Haas JP. Pain syndrome of the musculoskeletal system in children and adolescents. *Zeitschrift Fur Rheumatologie*. 2016;75(3):292-301.
3. King S, Chambers CT, Huguet A, MacNevin RC, McGrath PJ, Parker L, et al. The epidemiology of chronic pain in children and adolescents revisited: a systematic review. *Pain*. 2011;152(12):2729-38.
4. Auvinen JP, Paananen MVJ, Tammelin TH, Taimela SP, Mutanen POA, Zitting PJ, et al. Musculoskeletal pain combinations in adolescents. *Spine*. 2009;34(11):1192-7.
5. De Inocencio J. Epidemiology of musculoskeletal pain in primary care. *Arch Dis Child*. 2004;89(5):431-4.
6. Michaleff ZA, Kamper SJ, Stinson JN, Hestbaek L, Williams CM, Campbell P, et al. Measuring Musculoskeletal Pain in Infants, Children, and Adolescents. *J Orthop Sports Phys Ther*. 2017;47(10):712-30.
7. Smedbraten BK, Natvig B, Rutle O, Bruusgaard D. Self-reported bodily pain in schoolchildren. *Scand J Rheumatol*. 1998;27(4):273-6.
8. McGrath P. Psychological guidelines for helping children cope with chronic benign intractable pain. *The Clinical journal of pain*. 1986.
9. Rathleff CR, Olesen JL, Roos EM, Rasmussen S, Rathleff MS. Half of 12-15-year-olds with knee pain still have pain after one year. *Danish Medical Journal*. 2013;60 (11) (no pagination)(A4725).
10. Kastelein M, Luijsterburg PA, Heintjes EM, van Middelkoop M, Verhaar JA, Koes BW, et al. The 6-year trajectory of non-traumatic knee symptoms (including patellofemoral pain) in adolescents and young adults in general practice: a study of clinical predictors. *British journal of sports medicine*. 2015;49(6):400-5.
11. El-Metwally A, Salminen JJ, Auvinen A, Kautiainen H, Mikkelsen M. Lower limb pain in a preadolescent population: prognosis and risk factors for chronicity--a prospective 1- and 4-year follow-up study. *Pediatrics*. 2005;116(3):673-81.
12. Huguet A, Tougas ME, Hayden J, McGrath PJ, Stinson JN, Chambers CT. Systematic review with meta-analysis of childhood and adolescent risk and prognostic factors for musculoskeletal pain. *Pain*. 2016;157(12):2640-56.
13. iasp. Acute Musculoskeletal Pain [Available from: [https://www.iasp-pain.org/files/Content/ContentFolders/GlobalYearAgainstPain2/MusculoskeletalPainFactSheets/AcutePain\\_Final.pdf](https://www.iasp-pain.org/files/Content/ContentFolders/GlobalYearAgainstPain2/MusculoskeletalPainFactSheets/AcutePain_Final.pdf)].
14. Cochrane Training. Data collection form for intervention reviews 2014 [Available from: <http://training.cochrane.org/resource/data-collection-forms-intervention-reviews>].
15. Hayden JA, van der Windt DA, Cartwright JL, Cote P, Bombardier C. Assessing bias in studies of prognostic factors. *Ann Intern Med*. 2013;158(4):280-6.
16. Engel GL. The Need for a New Medical Model: A Challenge for Biomedicine Science 1977;196(No. 4286):19-136.

17. Stanford EA, Chambers CT, Biesanz JC, Chen E. The frequency, trajectories and predictors of adolescent recurrent pain: A population-based approach. *Pain*. 2008;138(1):11-21.
18. Moher D, Shamseer L, Clarke M, Ghersi D, Liberati A, Petticrew M, et al. Preferred reporting items for systematic review and meta-analysis protocols (PRISMA-P) 2015 statement. *Syst Rev*. 2015;4:1.
19. Blaauw BA, Dyb G, Hagen K, Holmen TL, Linde M, Wentzel-Larsen T, et al. The relationship of anxiety, depression and behavioral problems with recurrent headache in late adolescence - a Young-HUNT follow-up study. *Journal of Headache and Pain*. 2015;16(1):1-7.
20. Brattberg G. Back pain and headache in Swedish schoolchildren: A longitudinal study. *Pain Clinic*. 1993;6(3):157-62.
21. Brattberg G. Do pain problems in young school children persist into early adulthood? A 13-year follow-up. *European Journal of Pain*. 2004;8(3):187-99.
22. El-Metwally A, Salminen JJ, Auvinen A, Kautiainen H, Mikkelsen M. Prognosis of non-specific musculoskeletal pain in preadolescents: A prospective 4-year follow-up study till adolescence. *Pain*. 2004;110(3):550-9.
23. Flato B, Aasland A, Vandvik IH, Forre O. Outcome and predictive factors in children with chronic idiopathic musculoskeletal pain. *Clinical and Experimental Rheumatology*. 1997;15(5):569-77.
24. Holley AL, Wilson AC, Palermo TM. Predictors of the transition from acute to persistent musculoskeletal pain in children and adolescents: a prospective study. *Pain*. 2017;158(5):794-801.
25. Jones GT, Macfarlane GJ. Predicting persistent low back pain in schoolchildren: A prospective cohort study. *Arthritis Care and Research*. 2009;61(10):1359-66.
26. Jussila L, Paananen M, Nayha S, Taimela S, Tammelin T, Auvinen J, et al. Psychosocial and lifestyle correlates of musculoskeletal pain patterns in adolescence: A 2-year follow-up study. *European Journal of Pain (United Kingdom)*. 2014;18(1):139-46.
27. Laimi K, Vahlberg T, Salminen JJ, Metsahonkala L, Mikkelsen M, Anttila P, et al. Does neck pain determine the outcome of adolescent headache? *Cephalalgia*. 2007;27(3):244-53.
28. Lunde LK, Koch M, Hanvold TN, Waersted M, Veiersted KB. Low back pain and physical activity - A 6.5 year follow-up among young adults in their transition from school to working life. *Bmc Public Health*. 2015;15.
29. Mikkelsen M, Salminen JJ, Kautiainen H. Non-specific musculoskeletal pain in preadolescents. Prevalence and 1-year persistence. *Pain*. 1997;73(1):29-35.
30. Mikkelsen M, Salminen JJ, Sourander A, Kautiainen H. Contributing factors to the persistence of musculoskeletal pain in preadolescents: A prospective 1-year follow-up study. *Pain*. 1998;77(1):67-72.
31. Mikkelsen M, Sourander A, Salminen JJ, Kautiainen H, Piha J. Widespread pain and neck pain in schoolchildren. A prospective one-year follow-up study. *Acta Paediatrica, International Journal of Paediatrics*. 1999;88(10):1119-24.
32. Mikkonen P, Leino-Arjas P, Remes J, Zitting P, Taimela S, Karppinen J. Is smoking a risk factor for low back pain in adolescents? A prospective cohort study. *Spine*. 2008;33(5):527-32.
33. Mikkonen P, Viikari-Juntura E, Remes J, Pienimäki T, Solovieva S, Taimela S, et al. Physical workload and risk of low back pain in adolescence. *Occupational and Environmental Medicine*. 2011.

1  
2  
3  
4  
5  
6  
7  
8  
9  
10  
11  
12  
13  
14  
15  
16  
17  
18  
19  
20  
21  
22  
23  
24  
25  
26  
27  
28  
29  
30  
31  
32  
33  
34  
35  
36  
37  
38  
39  
40  
41  
42  
43  
44  
45  
46  
47  
48  
49  
50  
51  
52  
53  
54  
55  
56  
57  
58  
59  
60

34. Mikkonen PH, Laitinen J, Remes J, Tammelin T, Taimela S, Kaikkonen K, et al. Association between overweight and low back pain: A population-based prospective cohort study of adolescents. *Spine*. 2013;38(12):1026-33.
35. Paananen MV, Taimela SP, Auvinen JP, Tammelin TH, Kantomaa MT, Ebeling HE, et al. Risk factors for persistence of multiple musculoskeletal pains in adolescence: A 2-year follow-up study. *European Journal of Pain*. 2010;14(10):1026-32.
36. Rathleff MS, Rathleff CR, Olesen JL, Rasmussen S, Roos EM. Is Knee Pain During Adolescence a Self-limiting Condition? Prognosis of Patellofemoral Pain and Other Types of Knee Pain. *American Journal of Sports Medicine*. 2016;44(5):1165-71.
37. Rathleff MS, Roos EM, Olesen JL, Rasmussen S, Arendt-Nielsen L. Self-reported recovery is associated with improvement in localized hyperalgesia among adolescent females with patellofemoral pain: Results from a cluster randomized trial. *Clinical Journal of Pain*. 2016;32(5):428-34.
38. Sjolie AN, Ljunggren AE. The significance of high lumbar mobility and low lumbar strength for current and future low back pain in adolescents. *Spine*. 2001;26(23):2629-36.
39. Sperotto F, Brachi S, Vittadello F, Zulian F. Musculoskeletal pain in schoolchildren across puberty: A 3-year follow-up study. *Pediatric Rheumatology*. 2015.
40. Stahl M, Kautiainen H, El-Metwally A, Hakkinen A, Ylinen J, Salminen JJ, et al. Non-specific neck pain in schoolchildren: Prognosis and risk factors for occurrence and persistence. A 4-year follow-up study. *Pain*. 2008;137(2):316-22.
41. Uziel Y, Chapnick G, Jaber L, Nemet D, Hashkes PJ. Five-Year Outcome of Children With "Growing Pains": Correlations With Pain Threshold. *Journal of Pediatrics*. 2010;156(5):838-40.
42. Artus M, Campbell P, Mallen CD, Dunn KM, van der Windt DA. Generic prognostic factors for musculoskeletal pain in primary care: a systematic review. *BMJ Open*. 2017;7(1):e012901.
43. Bartley EJ, Fillingim RB. Sex differences in pain: a brief review of clinical and experimental findings. *British journal of anaesthesia*. 2013;111(1):52-8.
44. Fillingim RB, King CD, Ribeiro-Dasilva MC, Rahim-Williams B, Riley JL, 3rd. Sex, gender, and pain: a review of recent clinical and experimental findings. *The journal of pain : official journal of the American Pain Society*. 2009;10(5):447-85.
45. Racine M, Tousignant-Laflamme Y, Kloda LA, Dion D, Dupuis G, Choiniere M. A systematic literature review of 10 years of research on sex/gender and pain perception - part 2: do biopsychosocial factors alter pain sensitivity differently in women and men? *Pain*. 2012;153(3):619-35.
46. Polatin P, Bevers K, Gatchel RJ. Pharmacological treatment of depression in geriatric chronic pain patients: a biopsychosocial approach integrating functional restoration. *Expert Rev Clin Pharmacol*. 2017;10(9):957-63.
47. Amiri RS, Jouibari MF, Nejat F, El Khashab M. Iniencephaly: Clinical, Radiological and Surgical Findings. *Pediatric Neurosurgery*. 2010;46(4):290-3.
48. Gatchel RJ, Peng YB, Peters ML, Fuchs PN, Turk DC. The biopsychosocial approach to chronic pain: scientific advances and future directions. *Psychol Bull*. 2007;133(4):581-624.
49. El-Metwally A, Salminen JJ, Auvinen A, Kautiainen H, Mikkelsen M. Lower limb pain in a preadolescent population: Prognosis and risk factors for chronicity - A prospective 1- and 4-year follow-up study. *Pediatrics*. 2005;116(3):673-81.



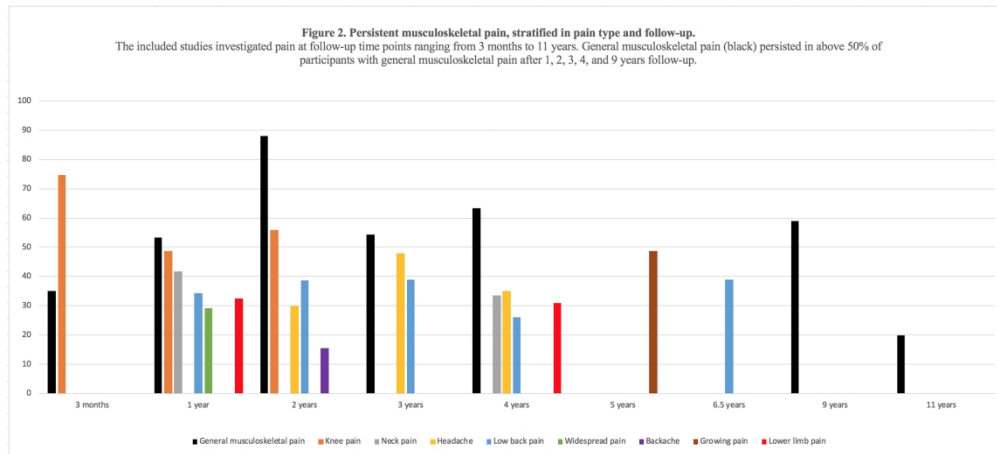

Caption : Persistent musculoskeletal pain, stratified in pain type and follow-up. The included studies investigated pain at follow-up time points ranging from 3 months to 11 years. General musculoskeletal pain (black) persisted in above 50% of participants after 1, 2, 3, 4, and 9 years follow-up.

469x212mm (300 x 300 DPI)

**Figure 3 PRISMA Flow Chart presenting the flow of citations reviewed in the course of the systematic review**  
 48,538 articles were identified through search in eight databases, resulting in 223 articles for full-text eligibility screen and a final number of 26 studies for inclusion yielding 111 prognostic factors on musculoskeletal pain.

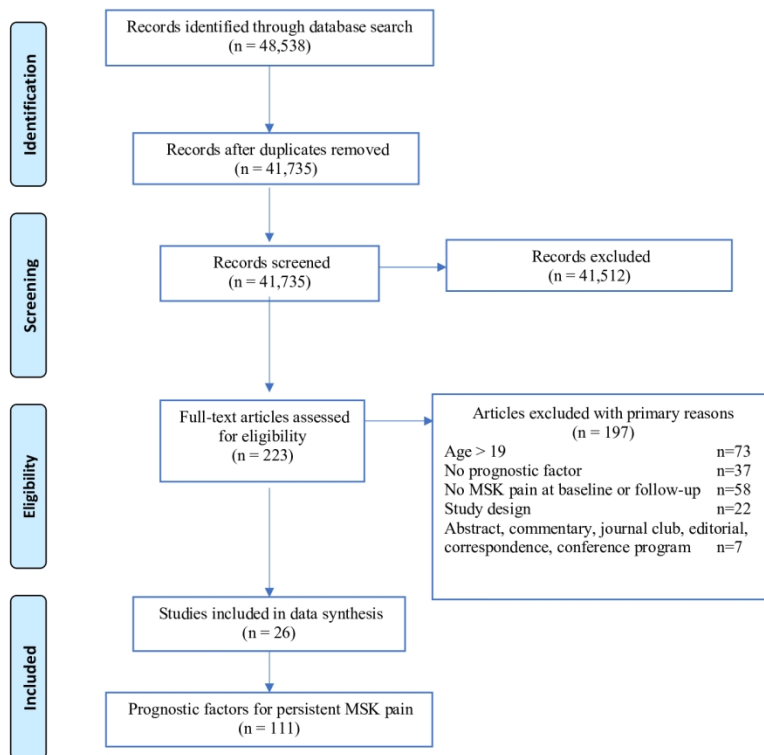

From: Moher D, Liberati A, Tetzlaff J, Altman DG, The PRISMA Group (2009). Preferred Reporting Items for Systematic Reviews and Meta-Analyses: The PRISMA Statement. *PLoS Med* 6(6): e1000097. doi:10.1371/journal.pmed1000097

For more information, visit [www.prisma-statement.org](http://www.prisma-statement.org).

PRISMA Flow Chart presenting the flow of citations reviewed in the course of the systematic review. 48,538 articles were identified through search in eight databases, resulting in 223 articles for full-text eligibility screen and a final number of 26 studies for inclusion yielding 111 prognostic factors on musculoskeletal pain.

215x279mm (200 x 200 DPI)

## Appendix 1

### Search history

Medline Ovid May 30th 2017

|    |                                                                                                                                                                                                                                                                                                                                                                                                                                             |           |
|----|---------------------------------------------------------------------------------------------------------------------------------------------------------------------------------------------------------------------------------------------------------------------------------------------------------------------------------------------------------------------------------------------------------------------------------------------|-----------|
| 1  | back pain/ or headache/ or exp musculoskeletal pain/ or Abdominal Pain/ or Back Pain/ or Low Back Pain/ or exp Arthralgia/ or Chest Pain/ or Facial Pain/ or Flank Pain/ or Metatarsalgia/ or Neck Pain/                                                                                                                                                                                                                                    | 110,274   |
| 2  | Acute Pain/ or Chronic Pain/ or Breakthrough Pain/ or Pain, Intractable/ or Pain, Referred/                                                                                                                                                                                                                                                                                                                                                 | 16,079    |
| 3  | (musculoskeletal or back pain or backache or headache or joint or PFP or tendinitis or cervical or jaw or limb or shoulder or arm or elbow or wrist or carpal or hand or finger or collar or vertebral or lumbar or back or backache or back pain or headache or hip or knee or patella* or patellofemoral or retropatellar or leg or ankle or foot or heel or arthralgia or osteochondritis or osgood or growing pain* or scheuermann).mp. | 1,960,816 |
| 4  | 2 and 3                                                                                                                                                                                                                                                                                                                                                                                                                                     | 4,733     |
| 5  | (backache or headache).mp.                                                                                                                                                                                                                                                                                                                                                                                                                  | 78,052    |
| 6  | ((pain or ache) adj3 (musculoskeletal or back or joint or PFP or tendinitis or cervical or jaw or limb or shoulder or arm or elbow or wrist or carpal or hand or finger or collar or vertebral or lumbar or hip or knee or patella* or patellofemoral or retropatellar or leg or ankle or foot or heel or arthralgia or osteochondritis or osgood or growing pain* or scheuermann)).mp.                                                     | 103,970   |
| 7  | 1 or 4 or 5 or 6                                                                                                                                                                                                                                                                                                                                                                                                                            | 217,985   |
| 8  | limit 7 to "all child (0 to 18 years)"                                                                                                                                                                                                                                                                                                                                                                                                      | 41,139    |
| 9  | (juvenile or adolescen* or preadolescence or Preadolescent or preschool or child or children or prepubertal or kids or paediatric or pediatric or youth or young or childhood or schoolchild* or teenager).mp.                                                                                                                                                                                                                              | 3,721,647 |
| 10 | 7 and 9                                                                                                                                                                                                                                                                                                                                                                                                                                     | 54,465    |
| 11 | 8 or 10                                                                                                                                                                                                                                                                                                                                                                                                                                     | 55,016    |
| 12 | (predict* or long term or Follow-up or Prospective or cohort or cluster or prognosis or prognostic or Mediator* or treatment effect modifier* or longitudinal*).mp.                                                                                                                                                                                                                                                                         | 4,208,880 |
| 13 | 11 and 12                                                                                                                                                                                                                                                                                                                                                                                                                                   | 20,363    |
| 14 | (systematic reviews or meta analysis).pt.                                                                                                                                                                                                                                                                                                                                                                                                   | 80,495    |
| 15 | case report/ or (case reports or letter or historical article or comment or editorial).pt.                                                                                                                                                                                                                                                                                                                                                  | 3,595,207 |
| 16 | limit 13 to (systematic reviews or meta analysis)                                                                                                                                                                                                                                                                                                                                                                                           | 466       |
| 17 | 14 or 15                                                                                                                                                                                                                                                                                                                                                                                                                                    | 3,674,563 |
| 18 | 13 not (16 or 17)                                                                                                                                                                                                                                                                                                                                                                                                                           | 17,183    |



EMBASE Ovid May 31<sup>st</sup> 2017

|    |                                                                                                                                                                                                                                                                                                                                                                                                                                             |           |
|----|---------------------------------------------------------------------------------------------------------------------------------------------------------------------------------------------------------------------------------------------------------------------------------------------------------------------------------------------------------------------------------------------------------------------------------------------|-----------|
| 1  | exp *musculoskeletal pain/                                                                                                                                                                                                                                                                                                                                                                                                                  | 40,261    |
| 2  | exp *"headache and facial pain"/                                                                                                                                                                                                                                                                                                                                                                                                            | 73,629    |
| 3  | exp *abdominal pain/                                                                                                                                                                                                                                                                                                                                                                                                                        | 10,492    |
| 4  | *arthralgia/                                                                                                                                                                                                                                                                                                                                                                                                                                | 4,782     |
| 5  | *thorax pain/                                                                                                                                                                                                                                                                                                                                                                                                                               | 9,691     |
| 6  | *flank pain/                                                                                                                                                                                                                                                                                                                                                                                                                                | 245       |
| 7  | *metatarsalgia/                                                                                                                                                                                                                                                                                                                                                                                                                             | 522       |
| 8  | 1 or 2 or 3 or 4 or 5 or 6 or 7                                                                                                                                                                                                                                                                                                                                                                                                             | 137,602   |
| 9  | *chronic pain/                                                                                                                                                                                                                                                                                                                                                                                                                              | 20,500    |
| 10 | *breakthrough pain/                                                                                                                                                                                                                                                                                                                                                                                                                         | 346       |
| 11 | *intractable pain/                                                                                                                                                                                                                                                                                                                                                                                                                          | 2,166     |
| 12 | *referred pain/                                                                                                                                                                                                                                                                                                                                                                                                                             | 233       |
| 13 | or/9-12                                                                                                                                                                                                                                                                                                                                                                                                                                     | 23,135    |
| 14 | (musculoskeletal or back pain or backache or headache or joint or PFP or tendinitis or cervical or jaw or limb or shoulder or arm or elbow or wrist or carpal or hand or finger or collar or vertebral or lumbar or back or backache or back pain or headache or hip or knee or patella* or patellofemoral or retropatellar or leg or ankle or foot or heel or arthralgia or osteochondritis or osgood or growing pain* or scheuermann).mp. | 2,678,325 |
| 15 | 13 and 14                                                                                                                                                                                                                                                                                                                                                                                                                                   | 8,147     |
| 16 | (backache or headache).mp.                                                                                                                                                                                                                                                                                                                                                                                                                  | 261,495   |
| 17 | ((pain or ache) adj3 (musculoskeletal or back or joint or PFP or tendinitis or cervical or jaw or limb or shoulder or arm or elbow or wrist or carpal or hand or finger or collar or vertebral or lumbar or hip or knee or patella* or patellofemoral or retropatellar or leg or ankle or foot or heel or arthralgia or osteochondritis or osgood or growing pain* or scheuermann)).mp.                                                     | 171,769   |
| 18 | 8 or 15 or 16 or 17                                                                                                                                                                                                                                                                                                                                                                                                                         | 450,426   |
| 19 | limit 18 to (infant <to one year> or child <unspecified age> or preschool child <1 to 6 years> or school child <7 to 12 years> or adolescent <13 to 17 years>)                                                                                                                                                                                                                                                                              | 54,948    |
| 20 | (juvenile or adolescen* or preadolescence or Preadolescent or preschool or child or children or prepubertal or kids or paediatric or pediatric or youth or young or childhood or schoolchild* or teenager).mp.                                                                                                                                                                                                                              | 3,594,291 |
| 21 | 18 and 20                                                                                                                                                                                                                                                                                                                                                                                                                                   | 79,053    |
| 22 | 19 or 21                                                                                                                                                                                                                                                                                                                                                                                                                                    | 79,102    |

|    |                                                                                                                                                                     |           |
|----|---------------------------------------------------------------------------------------------------------------------------------------------------------------------|-----------|
| 23 | (predict* or long term or Follow-up or Prospective or cohort or cluster or prognosis or prognostic or Mediator* or treatment effect modifier* or longitudinal*).mp. | 5,319,110 |
| 24 | 22 and 23                                                                                                                                                           | 28,128    |
| 25 | limit 24 to ("systematic review" or meta analysis)                                                                                                                  | 497       |
| 26 | case report/ or (letter or editorial or conference*).pt.                                                                                                            | 6,706,285 |
| 27 | 25 or 26                                                                                                                                                            | 6,706,709 |
| 28 | 24 not 27                                                                                                                                                           | 17,726    |

For peer review only

CINAHL Ebsco May 31<sup>st</sup> 2017

| I   | Search Terms                                                                                                                                                                                                                                                                                                                                                                      | Search Options                                                                                                                                                                       | Results |
|-----|-----------------------------------------------------------------------------------------------------------------------------------------------------------------------------------------------------------------------------------------------------------------------------------------------------------------------------------------------------------------------------------|--------------------------------------------------------------------------------------------------------------------------------------------------------------------------------------|---------|
| S18 | S16 not S17                                                                                                                                                                                                                                                                                                                                                                       | Search modes - Boolean/Phrase                                                                                                                                                        | 3,716   |
| S17 | PT (Systematic Review or Meta Analysis)                                                                                                                                                                                                                                                                                                                                           | Search modes - Boolean/Phrase                                                                                                                                                        | 41,837  |
| S16 | S14 AND S15                                                                                                                                                                                                                                                                                                                                                                       | Search modes - Boolean/Phrase                                                                                                                                                        | 3,802   |
| S15 | (predict* or long term or Follow-up or Prospective or cohort or cluster or prognosis or prognostic or Mediator* or treatment effect modifier* or longitudinal*)                                                                                                                                                                                                                   | Search modes - Boolean/Phrase                                                                                                                                                        | 530,171 |
| S14 | S11 OR S13                                                                                                                                                                                                                                                                                                                                                                        | Search modes - Boolean/Phrase                                                                                                                                                        | 11,516  |
| S13 | S10 AND S12                                                                                                                                                                                                                                                                                                                                                                       | Search modes - Boolean/Phrase                                                                                                                                                        | 11,425  |
| S12 | (juvenile or adolescen* or preadolescence or Preadolescent or preschool or child or children or prepubertal or kids or paediatric or pediatric or youth or young or childhood or schoolchild* or teenager)                                                                                                                                                                        | Search modes - Boolean/Phrase                                                                                                                                                        | 590,118 |
| S11 | S1 OR S7 OR S8 OR S9                                                                                                                                                                                                                                                                                                                                                              | Limiters - Age Groups: Infant, Newborn: birth-1 month, Infant: 1-23 months, Child, Preschool: 2-5 years, Child: 6-12 years, Adolescent: 13-18 years<br>Search modes - Boolean/Phrase | 8,712   |
| S10 | S1 OR S7 OR S8 OR S9                                                                                                                                                                                                                                                                                                                                                              | Search modes - Boolean/Phrase                                                                                                                                                        | 64,982  |
| S9  | ((pain or ache) N3 (musculoskeletal or back or joint or PFP or tendinitis or cervical or jaw or limb or shoulder or arm or elbow or wrist or carpal or hand or finger or collar or vertebral or lumbar or hip or knee or patella* or patellofemoral or retropatellar or leg or ankle or foot or heel or arthralgia or osteochondritis or osgood or growing pain* or scheuermann)) | Search modes - Boolean/Phrase                                                                                                                                                        | 37,883  |
| S8  | backache or headache                                                                                                                                                                                                                                                                                                                                                              | Search modes - Boolean/Phrase                                                                                                                                                        | 16,417  |
| S7  | S5 AND S6                                                                                                                                                                                                                                                                                                                                                                         | Search modes - Boolean/Phrase                                                                                                                                                        | 4,707   |

|    |                                                                                                                                                                                                                                                                                                                                                                                                                                         |                               |         |
|----|-----------------------------------------------------------------------------------------------------------------------------------------------------------------------------------------------------------------------------------------------------------------------------------------------------------------------------------------------------------------------------------------------------------------------------------------|-------------------------------|---------|
| S6 | (musculoskeletal or back pain or backache or headache or joint or PFP or tendinitis or cervical or jaw or limb or shoulder or arm or elbow or wrist or carpal or hand or finger or collar or vertebral or lumbar or back or backache or back pain or headache or hip or knee or patella* or patellofemoral or retropatellar or leg or ankle or foot or heel or arthralgia or osteochondritis or osgood or growing pain* or scheuermann) | Search modes - Boolean/Phrase | 312,634 |
| S5 | S2 OR S3 OR S4                                                                                                                                                                                                                                                                                                                                                                                                                          | Search modes - Boolean/Phrase | 12,235  |
| S4 | (MH "Referred Pain")                                                                                                                                                                                                                                                                                                                                                                                                                    | Search modes - Boolean/Phrase | 284     |
| S3 | (MH "Breakthrough Pain")                                                                                                                                                                                                                                                                                                                                                                                                                | Search modes - Boolean/Phrase | 58      |
| S2 | (MH "Chronic Pain")                                                                                                                                                                                                                                                                                                                                                                                                                     | Search modes - Boolean/Phrase | 11,921  |
| S1 | (MH "Back Pain") OR (MH "Low Back Pain") OR (MH "Facial Pain") OR (MH "Headache") OR (MH "Knee Pain+") OR (MH "Metatarsalgia") OR (MH "Muscle Pain") OR (MH "Neck Pain") OR (MH "Arthralgia") OR (MH "Shoulder Pain") OR (MH "Chest Pain") OR (MH "Elbow Pain") OR (MH "Heel Pain") OR (MH "Abdominal Pain")                                                                                                                            | Search modes - Boolean/Phrase | 40,609  |

Cochrane June 9<sup>th</sup> 2017

Search Name:

Date Run: 09/06/17 10:28:15.152

Description:

ID Search Hits

#1 ((pain or ache) next/3 (musculoskeletal or back pain or backache or headache or joint or PFP or tendinitis or cervical or jaw or limb or shoulder or arm or elbow or wrist or carpal or hand or finger or collar or vertebral or lumbar or back or backache or back pain or headache or hip or knee or patella\* or patellofemoral or retropatellar or leg or ankle or foot or heel or arthralgia or osteochondritis or osgood or growing pain\* or scheuermann)) 7405

#2 (backache or headache) 26356

#3 #1 or #2 32236

#4 (juvenile or adolescen\* or preadolescence or Preadolescent or preschool or child or children or prepubertal or kids or paediatric or pediatric or youth or young or childhood or schoolchild\* or teenager) 243010

#5 #3 and #4 8870

#6 (predict\* or long term or Follow-up or Prospective or cohort or cluster or prognosis or prognostic or Mediator\* or treatment effect modifier\* or longitudinal\*) 399020

#7 #5 and #6 4430

All Results (4430)

Cochrane Reviews (1311)

All

Review

Protocol

Other Reviews (66)

Trials (3002)

Methods Studies (0)

Technology Assessments (4)

Economic Evaluations (34)

Cochrane Groups (13)

Imported: Trial, Technology, Economic

Web of Science June 9<sup>th</sup> 2017

| Set | Results   |                                                                                                                                                                                                                                                                                                                                                                                                                                                                                                                                       | Edit Sets | Combine Sets<br>AND OR<br>Combine | Delete Sets<br>Select All<br>Delete |
|-----|-----------|---------------------------------------------------------------------------------------------------------------------------------------------------------------------------------------------------------------------------------------------------------------------------------------------------------------------------------------------------------------------------------------------------------------------------------------------------------------------------------------------------------------------------------------|-----------|-----------------------------------|-------------------------------------|
| # 9 | 11,624    | #8 AND #7<br><i>Indexes=SCI-EXPANDED, SSCI, A&amp;HCI, CPCI-S, CPCI-SSH, ESCI Timespan=All years</i>                                                                                                                                                                                                                                                                                                                                                                                                                                  | Edit      | <input type="checkbox"/>          | <input type="checkbox"/>            |
| # 8 | 5,905,200 | ts=(predict* or long term or Follow-up or Prospective or cohort or cluster or prognosis or prognostic or Mediator* or treatment effect modifier* or longitudinal*)<br><i>Indexes=SCI-EXPANDED, SSCI, A&amp;HCI, CPCI-S, CPCI-SSH, ESCI Timespan=All years</i>                                                                                                                                                                                                                                                                         | Edit      | <input type="checkbox"/>          | <input type="checkbox"/>            |
| # 7 | 29,467    | #6 AND #5<br><i>Indexes=SCI-EXPANDED, SSCI, A&amp;HCI, CPCI-S, CPCI-SSH, ESCI Timespan=All years</i>                                                                                                                                                                                                                                                                                                                                                                                                                                  | Edit      | <input type="checkbox"/>          | <input type="checkbox"/>            |
| # 6 | 2,457,687 | ts=(juvenile or adolescen* or preadolescence or Preadolescent or preschool or child or children or prepubertal or kids or paediatric or pediatric or youth or young or childhood or schoolchild* or teenager)<br><i>Indexes=SCI-EXPANDED, SSCI, A&amp;HCI, CPCI-S, CPCI-SSH, ESCI Timespan=All years</i>                                                                                                                                                                                                                              | Edit      | <input type="checkbox"/>          | <input type="checkbox"/>            |
| # 5 | 240,860   | #4 OR #3<br><i>Indexes=SCI-EXPANDED, SSCI, A&amp;HCI, CPCI-S, CPCI-SSH, ESCI Timespan=All years</i>                                                                                                                                                                                                                                                                                                                                                                                                                                   | Edit      | <input type="checkbox"/>          | <input type="checkbox"/>            |
| # 4 | 66,234    | ts=(backache or headache)<br><i>Indexes=SCI-EXPANDED, SSCI, A&amp;HCI, CPCI-S, CPCI-SSH, ESCI Timespan=All years</i>                                                                                                                                                                                                                                                                                                                                                                                                                  | Edit      | <input type="checkbox"/>          | <input type="checkbox"/>            |
| # 3 | 191,133   | #2 AND #1<br><i>Indexes=SCI-EXPANDED, SSCI, A&amp;HCI, CPCI-S, CPCI-SSH, ESCI Timespan=All years</i>                                                                                                                                                                                                                                                                                                                                                                                                                                  | Edit      | <input type="checkbox"/>          | <input type="checkbox"/>            |
| # 2 | 2,616,397 | TS=(musculoskeletal or back pain or backache or headache or joint or PFP or tendinitis or cervical or jaw or limb or shoulder or arm or elbow or wrist or carpal or hand or finger or collar or vertebral or lumbar or back or backache or back pain or headache or hip or knee or patella* or patellofemoral or retropatellar or leg or ankle or foot or heel or arthralgia or osteochondritis or osgood or growing pain* or scheuermann)<br><i>Indexes=SCI-EXPANDED, SSCI, A&amp;HCI, CPCI-S, CPCI-SSH, ESCI Timespan=All years</i> | Edit      | <input type="checkbox"/>          | <input type="checkbox"/>            |
| # 1 | 491,777   | ts=(pain or ache)<br><i>Indexes=SCI-EXPANDED, SSCI, A&amp;HCI, CPCI-S, CPCI-SSH, ESCI Timespan=All years</i>                                                                                                                                                                                                                                                                                                                                                                                                                          | Edit      | <input type="checkbox"/>          | <input type="checkbox"/>            |
|     |           |                                                                                                                                                                                                                                                                                                                                                                                                                                                                                                                                       |           | AND OR<br>Combine                 | Select All<br>Delete                |

SportDiscus June 9<sup>th</sup> 2017

|    |                                                                                                                                                                                                                                                                                                                                                                                   |                               |         |
|----|-----------------------------------------------------------------------------------------------------------------------------------------------------------------------------------------------------------------------------------------------------------------------------------------------------------------------------------------------------------------------------------|-------------------------------|---------|
| S7 | ((predict* or long term or Follow-up or Prospective or cohort or cluster or prognosis or prognostic or Mediator* or treatment effect modifier* or longitudinal*)) AND (S5 AND S6)                                                                                                                                                                                                 | Search modes - Boolean/Phrase | 843     |
| S6 | (predict* or long term or Follow-up or Prospective or cohort or cluster or prognosis or prognostic or Mediator* or treatment effect modifier* or longitudinal*)                                                                                                                                                                                                                   | Search modes - Boolean/Phrase | 118,227 |
| S5 | S3 AND S4                                                                                                                                                                                                                                                                                                                                                                         | Search modes - Boolean/Phrase | 2,876   |
| S4 | (juvenile or adolescen* or preadolescence or Preadolescent or preschool or child or children or prepubertal or kids or paediatric or pediatric or youth or young or childhood or schoolchild* or teenager)                                                                                                                                                                        | Search modes - Boolean/Phrase | 200,385 |
| S3 | (S1 OR S2)                                                                                                                                                                                                                                                                                                                                                                        | Search modes - Boolean/Phrase | 25,984  |
| S2 | backache or headache                                                                                                                                                                                                                                                                                                                                                              | Search modes - Boolean/Phrase | 12,066  |
| S1 | ((pain or ache) N3 (musculoskeletal or back or joint or PFP or tendinitis or cervical or jaw or limb or shoulder or arm or elbow or wrist or carpal or hand or finger or collar or vertebral or lumbar or hip or knee or patella* or patellofemoral or retropatellar or leg or ankle or foot or heel or arthralgia or osteochondritis or osgood or growing pain* or scheuermann)) | Search modes - Boolean/Phrase | 18,440  |

1  
2  
3  
4 OT-seeker June 9<sup>th</sup> 2017  
5

6 ((pain or ache)

7 AND

8 (musculoskeletal or back pain or backache or headache or joint or PFP or tendinitis or cervical or  
9 jaw or limb or shoulder or arm or elbow or wrist or carpal or hand or finger or collar or vertebral or  
10 lumbar or back or backache or back pain or headache or hip or knee or patella\* or patellofemoral or  
11 retropatellar or leg or ankle or foot or heel or arthralgia or osteochondritis or osgood or growing  
12 pain\* or scheuermann))

13 AND

14 juvenile or adolescen\* or preadolescence or Preadolescent or preschool or child or children or  
15 prepubertal or kids or paediatric or pediatric or youth or young or childhood or schoolchild\* or  
16 teenager  
17  
18  
19  
20  
21  
22  
23  
24  
25  
26  
27  
28  
29  
30  
31  
32  
33  
34  
35  
36  
37  
38  
39  
40  
41  
42  
43  
44  
45  
46  
47  
48  
49  
50  
51  
52  
53  
54  
55  
56  
57  
58  
59  
60



PsychInfo June 9<sup>th</sup> 2017

|    |                                                                                                                                                                                                                                                                                                                                                                                                                                             |         |
|----|---------------------------------------------------------------------------------------------------------------------------------------------------------------------------------------------------------------------------------------------------------------------------------------------------------------------------------------------------------------------------------------------------------------------------------------------|---------|
| 1  | exp Musculoskeletal Disorders/                                                                                                                                                                                                                                                                                                                                                                                                              | 15,728  |
| 2  | headache/ or muscle contraction headache/                                                                                                                                                                                                                                                                                                                                                                                                   | 7,110   |
| 3  | myofascial pain/                                                                                                                                                                                                                                                                                                                                                                                                                            | 317     |
| 4  | back pain/                                                                                                                                                                                                                                                                                                                                                                                                                                  | 3,411   |
| 5  | or/1-4                                                                                                                                                                                                                                                                                                                                                                                                                                      | 25,776  |
| 6  | chronic pain/                                                                                                                                                                                                                                                                                                                                                                                                                               | 11,631  |
| 7  | pain/                                                                                                                                                                                                                                                                                                                                                                                                                                       | 22,243  |
| 8  | 6 or 7                                                                                                                                                                                                                                                                                                                                                                                                                                      | 33,184  |
| 9  | (musculoskeletal or back pain or backache or headache or joint or PFP or tendinitis or cervical or jaw or limb or shoulder or arm or elbow or wrist or carpal or hand or finger or collar or vertebral or lumbar or back or backache or back pain or headache or hip or knee or patella* or patellofemoral or retropatellar or leg or ankle or foot or heel or arthralgia or osteochondritis or osgood or growing pain* or scheuermann).mp. | 220,772 |
| 10 | 8 and 9                                                                                                                                                                                                                                                                                                                                                                                                                                     | 9,266   |
| 11 | (backache or headache).mp.                                                                                                                                                                                                                                                                                                                                                                                                                  | 18,772  |
| 12 | ((pain or ache) adj3 (musculoskeletal or back or joint or PFP or tendinitis or cervical or jaw or limb or shoulder or arm or elbow or wrist or carpal or hand or finger or collar or vertebral or lumbar or hip or knee or patella* or patellofemoral or retropatellar or leg or ankle or foot or heel or arthralgia or osteochondritis or osgood or growing pain* or scheuermann)).mp.                                                     | 9,290   |
| 13 | 5 or 10 or 11 or 12                                                                                                                                                                                                                                                                                                                                                                                                                         | 43,824  |
| 14 | limit 13 to (100 childhood <birth to age 12 yrs> or 200 adolescence <age 13 to 17 yrs>)                                                                                                                                                                                                                                                                                                                                                     | 5,603   |
| 15 | (juvenile or adolescen* or preadolescence or Preadolescent or preschool or child or children or prepubertal or kids or paediatric or pediatric or youth or young or childhood or schoolchild* or teenager).mp.                                                                                                                                                                                                                              | 895,379 |
| 16 | 13 and 15                                                                                                                                                                                                                                                                                                                                                                                                                                   | 5,465   |
| 17 | 14 or 16                                                                                                                                                                                                                                                                                                                                                                                                                                    | 7,676   |
| 18 | (predict* or long term or Follow-up or Prospective or cohort or cluster or prognosis or prognostic or Mediator* or treatment effect modifier* or longitudinal*).mp.                                                                                                                                                                                                                                                                         | 723,493 |
| 19 | 17 and 18                                                                                                                                                                                                                                                                                                                                                                                                                                   | 2,119   |
| 20 | ((systematic or method*) adj3 (review* or overview* or study or studies or search* or approach*)) or meta analy* or meta-analy* or metaanaly*).ti,ab,id.                                                                                                                                                                                                                                                                                    | 142,307 |
| 21 | limit 19 to ("0830 systematic review" or 1200 meta analysis)                                                                                                                                                                                                                                                                                                                                                                                | 36      |
| 22 | 21 or 20                                                                                                                                                                                                                                                                                                                                                                                                                                    | 142,310 |

|    |                                |        |
|----|--------------------------------|--------|
| 23 | 19 not 22                      | 1,971  |
| 1  | exp Musculoskeletal Disorders/ | 15,728 |

## Search history 01.02.2019

PubMed 31.05.2017-01.02.2019

### History

[Download history](#) [Clear history](#)

| Search              | Add to builder      | Query                                                                                                                                                                                                                                                                                                                                                                                                                                                                                                                                                                                                                                                                                                                                                                                                                                                                                                                                                                                                                                                                                                                                                                                                                                                                                                                                                                                                                                                                                                                                                                                                                                                                                                                                                                                                                                                                                                                                                                                                                                                                                                                                                                                                                                                                                                                                                                                                                                                                                                                                                                                                                                                                                                                                                                                                                                                                                                                                                                                                                                                                                                                                               | Items found          |
|---------------------|---------------------|-----------------------------------------------------------------------------------------------------------------------------------------------------------------------------------------------------------------------------------------------------------------------------------------------------------------------------------------------------------------------------------------------------------------------------------------------------------------------------------------------------------------------------------------------------------------------------------------------------------------------------------------------------------------------------------------------------------------------------------------------------------------------------------------------------------------------------------------------------------------------------------------------------------------------------------------------------------------------------------------------------------------------------------------------------------------------------------------------------------------------------------------------------------------------------------------------------------------------------------------------------------------------------------------------------------------------------------------------------------------------------------------------------------------------------------------------------------------------------------------------------------------------------------------------------------------------------------------------------------------------------------------------------------------------------------------------------------------------------------------------------------------------------------------------------------------------------------------------------------------------------------------------------------------------------------------------------------------------------------------------------------------------------------------------------------------------------------------------------------------------------------------------------------------------------------------------------------------------------------------------------------------------------------------------------------------------------------------------------------------------------------------------------------------------------------------------------------------------------------------------------------------------------------------------------------------------------------------------------------------------------------------------------------------------------------------------------------------------------------------------------------------------------------------------------------------------------------------------------------------------------------------------------------------------------------------------------------------------------------------------------------------------------------------------------------------------------------------------------------------------------------------------------|----------------------|
| <a href="#">#60</a> | <a href="#">Add</a> | Search (((((((((((((((("Back Pain"[Mesh:NoExp]) OR "Musculoskeletal Pain"[Mesh]) OR "Abdominal Pain"[Mesh:NoExp]) OR "Low Back Pain"[Mesh]) OR "Arthralgia"[Mesh]) OR "Chest Pain"[Mesh]) OR "Facial Pain"[Mesh:NoExp]) OR "Flank Pain"[Mesh]) OR "Metatarsalgia"[Mesh:NoExp]) OR "Neck Pain"[Mesh])) OR (((("Acute Pain"[Mesh]) OR "Chronic Pain"[Mesh]) OR "Breakthrough Pain"[Mesh]) OR "Pain, Intractable"[Mesh]) OR "Pain, Referred"[Mesh])) AND ((musculoskeletal[Text Word] OR back pain[Text Word] OR backache[Text Word] OR headache[Text Word] OR joint[Text Word] OR PFP[Text Word] OR tendinitis[Text Word] OR cervical[Text Word] OR jaw[Text Word] OR limb[Text Word] OR shoulder[Text Word] OR arm[Text Word] OR elbow[Text Word] OR wrist[Text Word] OR carpal[Text Word] OR hand[Text Word] OR finger[Text Word] OR collar[Text Word] OR vertebral[Text Word] OR lumbar[Text Word] OR back[Text Word] OR backache[Text Word] OR back pain[Text Word] OR headache[Text Word] OR hip[Text Word] OR knee[Text Word] OR patella*[Text Word] OR patellofemoral[Text Word] OR retropatellar[Text Word] OR leg[Text Word] OR ankle[Text Word] OR foot[Text Word] OR heel[Text Word] OR arthralgia[Text Word] OR osteochondritis[Text Word] OR osgood[Text Word] OR growing pain*[Text Word] OR scheuermann[Text Word]))) OR ((backache[Text Word] OR headache[Text Word])) OR (((pain[Text Word] OR ache[Text Word])) AND (musculoskeletal[Text Word] OR back[Text Word] OR joint[Text Word] OR PFP[Text Word] OR tendinitis[Text Word] OR cervical[Text Word] OR jaw[Text Word] OR limb[Text Word] OR shoulder[Text Word] OR arm[Text Word] OR elbow[Text Word] OR wrist[Text Word] OR carpal[Text Word] OR hand[Text Word] OR finger[Text Word] OR collar[Text Word] OR vertebral[Text Word] OR lumbar[Text Word] OR hip[Text Word] OR knee[Text Word] OR patella*[Text Word] OR patellofemoral[Text Word] OR retropatellar[Text Word] OR leg[Text Word] OR ankle[Text Word] OR foot[Text Word] OR heel[Text Word] OR arthralgia[Text Word] OR osteochondritis[Text Word] OR osgood[Text Word] OR growing pain*[Text Word] OR scheuermann[Text Word]))) AND (((juvenile[Text Word] OR adolescen*[Text Word] OR preadolescence[Text Word] OR Preadolescent[Text Word] OR preschool[Text Word] OR child[Text Word] OR children[Text Word] OR prepubertal[Text Word] OR kids[Text Word] OR paediatric[Text Word] OR pediatric[Text Word] OR youth[Text Word] OR young[Text Word] OR childhood[Text Word] OR schoolchild*[Text Word] OR teenager[Text Word])) OR (((("Adolescent"[Mesh]) OR "Child"[Mesh]) OR "Infant"[Mesh]))) AND ((predict*[Text Word] OR long term[Text Word] OR Follow-up[Text Word] OR Prospective[Text Word] OR cohort[Text Word] OR cluster[Text Word] OR prognosis[Text Word] OR prognostic[Text Word] OR Mediator*[Text Word] OR treatment effect modifier*[Text Word] OR longitudinal*[Text Word]))) NOT (((("Systematic Review" [Publication Type]) OR "Meta-Analysis" [Publication Type]) OR "Case Reports" [Publication Type]) OR "Letter" [Publication Type]) OR "Historical Article" [Publication Type]) OR | <a href="#">2514</a> |

| Search | Add to builder      | Query                                                                                                                                                                                                                                                                                                                                                                                                                                                                                                                                                                                                                                                                                                                                                                                                                                                                                                                                                                                                                                                                                                                                                                                                                                                                                                                                                                                                                                                                                                                                                                                                                                                                                                                                                                                                                                                                                                                                                                                                                                                                                                                                                                                                                                                                                                                                                                                                                                                                                                                                                                                                                                                                                                                                                                                                                                                                                                                                                                                                                                                                                                                                                                                                                | Items found             |
|--------|---------------------|----------------------------------------------------------------------------------------------------------------------------------------------------------------------------------------------------------------------------------------------------------------------------------------------------------------------------------------------------------------------------------------------------------------------------------------------------------------------------------------------------------------------------------------------------------------------------------------------------------------------------------------------------------------------------------------------------------------------------------------------------------------------------------------------------------------------------------------------------------------------------------------------------------------------------------------------------------------------------------------------------------------------------------------------------------------------------------------------------------------------------------------------------------------------------------------------------------------------------------------------------------------------------------------------------------------------------------------------------------------------------------------------------------------------------------------------------------------------------------------------------------------------------------------------------------------------------------------------------------------------------------------------------------------------------------------------------------------------------------------------------------------------------------------------------------------------------------------------------------------------------------------------------------------------------------------------------------------------------------------------------------------------------------------------------------------------------------------------------------------------------------------------------------------------------------------------------------------------------------------------------------------------------------------------------------------------------------------------------------------------------------------------------------------------------------------------------------------------------------------------------------------------------------------------------------------------------------------------------------------------------------------------------------------------------------------------------------------------------------------------------------------------------------------------------------------------------------------------------------------------------------------------------------------------------------------------------------------------------------------------------------------------------------------------------------------------------------------------------------------------------------------------------------------------------------------------------------------------|-------------------------|
|        |                     | "Comment" [Publication Type]) OR "Editorial" [Publication Type]) Filters: Publication date from 2017/05/31 to 2019/12/31                                                                                                                                                                                                                                                                                                                                                                                                                                                                                                                                                                                                                                                                                                                                                                                                                                                                                                                                                                                                                                                                                                                                                                                                                                                                                                                                                                                                                                                                                                                                                                                                                                                                                                                                                                                                                                                                                                                                                                                                                                                                                                                                                                                                                                                                                                                                                                                                                                                                                                                                                                                                                                                                                                                                                                                                                                                                                                                                                                                                                                                                                             |                         |
| #59    | <a href="#">Add</a> | Search (((((((((((((((("Back Pain"[Mesh:NoExp]) OR "Musculoskeletal Pain"[Mesh]) OR "Abdominal Pain"[Mesh:NoExp]) OR "Low Back Pain"[Mesh]) OR "Arthralgia"[Mesh]) OR "Chest Pain"[Mesh]) OR "Facial Pain"[Mesh:NoExp]) OR "Flank Pain"[Mesh]) OR "Metatarsalgia"[Mesh:NoExp]) OR "Neck Pain"[Mesh])) OR (((("Acute Pain"[Mesh]) OR "Chronic Pain"[Mesh]) OR "Breakthrough Pain"[Mesh]) OR "Pain, Intractable"[Mesh]) OR "Pain, Referred"[Mesh])) AND ((musculoskeletal[Text Word] OR back pain[Text Word] OR backache[Text Word] OR headache[Text Word] OR joint[Text Word] OR PFP[Text Word] OR tendinitis[Text Word] OR cervical[Text Word] OR jaw[Text Word] OR limb[Text Word] OR shoulder[Text Word] OR arm[Text Word] OR elbow[Text Word] OR wrist[Text Word] OR carpal[Text Word] OR hand[Text Word] OR finger[Text Word] OR collar[Text Word] OR vertebral[Text Word] OR lumbar[Text Word] OR back[Text Word] OR backache[Text Word] OR back pain[Text Word] OR headache[Text Word] OR hip[Text Word] OR knee[Text Word] OR patella*[Text Word] OR patellofemoral[Text Word] OR retropatellar[Text Word] OR leg[Text Word] OR ankle[Text Word] OR foot[Text Word] OR heel[Text Word] OR arthralgia[Text Word] OR osteochondritis[Text Word] OR osgood[Text Word] OR growing pain*[Text Word] OR scheuermann[Text Word]))) OR ((backache[Text Word] OR headache[Text Word])) OR (((pain[Text Word] OR ache[Text Word])) AND (musculoskeletal[Text Word] OR back[Text Word] OR joint[Text Word] OR PFP[Text Word] OR tendinitis[Text Word] OR cervical[Text Word] OR jaw[Text Word] OR limb[Text Word] OR shoulder[Text Word] OR arm[Text Word] OR elbow[Text Word] OR wrist[Text Word] OR carpal[Text Word] OR hand[Text Word] OR finger[Text Word] OR collar[Text Word] OR vertebral[Text Word] OR lumbar[Text Word] OR hip[Text Word] OR knee[Text Word] OR patella*[Text Word] OR patellofemoral[Text Word] OR retropatellar[Text Word] OR leg[Text Word] OR ankle[Text Word] OR foot[Text Word] OR heel[Text Word] OR arthralgia[Text Word] OR osteochondritis[Text Word] OR osgood[Text Word] OR growing pain*[Text Word] OR scheuermann[Text Word]))) AND (((juvenile[Text Word] OR adolescen*[Text Word] OR preadolescence[Text Word] OR Preadolescent[Text Word] OR preschool[Text Word] OR child[Text Word] OR children[Text Word] OR prepubertal[Text Word] OR kids[Text Word] OR paediatric[Text Word] OR pediatric[Text Word] OR youth[Text Word] OR young[Text Word] OR childhood[Text Word] OR schoolchild*[Text Word] OR teenager[Text Word])) OR (((("Adolescent"[Mesh]) OR "Child"[Mesh]) OR "Infant"[Mesh]))) AND ((predict*[Text Word] OR long term[Text Word] OR Follow-up[Text Word] OR Prospective[Text Word] OR cohort[Text Word] OR cluster[Text Word] OR prognosis[Text Word] OR prognostic[Text Word] OR Mediator*[Text Word] OR treatment effect modifier*[Text Word] OR longitudinal*[Text Word]))) NOT (((("Systematic Review" [Publication Type]) OR "Meta-Analysis" [Publication Type]) OR "Case Reports" [Publication Type]) OR "Letter" [Publication Type]) OR "Historical Article" [Publication Type]) OR "Comment" [Publication Type]) OR "Editorial" [Publication Type]) | <a href="#">29128</a>   |
| #58    | <a href="#">Add</a> | Search (((("Systematic Review" [Publication Type]) OR "Meta-Analysis" [Publication Type]) OR "Case Reports" [Publication Type]) OR "Letter" [Publication Type]) OR "Historical Article" [Publication Type]) OR "Comment" [Publication Type]) OR "Editorial" [Publication Type]                                                                                                                                                                                                                                                                                                                                                                                                                                                                                                                                                                                                                                                                                                                                                                                                                                                                                                                                                                                                                                                                                                                                                                                                                                                                                                                                                                                                                                                                                                                                                                                                                                                                                                                                                                                                                                                                                                                                                                                                                                                                                                                                                                                                                                                                                                                                                                                                                                                                                                                                                                                                                                                                                                                                                                                                                                                                                                                                       | <a href="#">3926007</a> |
| #43    | <a href="#">Add</a> | Search (((((((((((((((("Back Pain"[Mesh:NoExp]) OR "Musculoskeletal Pain"[Mesh]) OR "Abdominal Pain"[Mesh:NoExp]) OR "Low Back Pain"[Mesh]) OR "Arthralgia"[Mesh]) OR "Chest Pain"[Mesh]) OR "Facial Pain"[Mesh:NoExp]) OR "Flank Pain"[Mesh]) OR "Metatarsalgia"[Mesh:NoExp]) OR "Neck Pain"[Mesh])) OR (((("Acute Pain"[Mesh]) OR "Chronic Pain"[Mesh]) OR "Breakthrough Pain"[Mesh]) OR "Pain, Intractable"[Mesh]) OR "Pain, Referred"[Mesh])) AND ((musculoskeletal[Text Word] OR back pain[Text Word] OR backache[Text Word] OR headache[Text Word] OR joint[Text                                                                                                                                                                                                                                                                                                                                                                                                                                                                                                                                                                                                                                                                                                                                                                                                                                                                                                                                                                                                                                                                                                                                                                                                                                                                                                                                                                                                                                                                                                                                                                                                                                                                                                                                                                                                                                                                                                                                                                                                                                                                                                                                                                                                                                                                                                                                                                                                                                                                                                                                                                                                                                               | <a href="#">33553</a>   |

1  
2  
3  
4  
5  
6  
7  
8  
9  
10  
11  
12  
13  
14  
15  
16  
17  
18  
19  
20  
21  
22  
23  
24  
25  
26  
27  
28  
29  
30  
31  
32  
33  
34  
35  
36  
37  
38  
39  
40  
41  
42  
43  
44  
45  
46  
47  
48  
49  
50  
51  
52  
53  
54  
55  
56  
57  
58  
59  
60

| Search | Add to builder                          | Query                                                                                                                                                                                                                                                                                                                                                                                                                                                                                                                                                                                                                                                                                                                                                                                                                                                                                                                                                                                                                                                                                                                                                                                                                                                                                                                                                                                                                                                                                                                                                                                                                                                                                                                                                                                                                                                                                                                                                                                                                                                                                                                                                                                                                                                                                                                                                           | Items found             |
|--------|-----------------------------------------|-----------------------------------------------------------------------------------------------------------------------------------------------------------------------------------------------------------------------------------------------------------------------------------------------------------------------------------------------------------------------------------------------------------------------------------------------------------------------------------------------------------------------------------------------------------------------------------------------------------------------------------------------------------------------------------------------------------------------------------------------------------------------------------------------------------------------------------------------------------------------------------------------------------------------------------------------------------------------------------------------------------------------------------------------------------------------------------------------------------------------------------------------------------------------------------------------------------------------------------------------------------------------------------------------------------------------------------------------------------------------------------------------------------------------------------------------------------------------------------------------------------------------------------------------------------------------------------------------------------------------------------------------------------------------------------------------------------------------------------------------------------------------------------------------------------------------------------------------------------------------------------------------------------------------------------------------------------------------------------------------------------------------------------------------------------------------------------------------------------------------------------------------------------------------------------------------------------------------------------------------------------------------------------------------------------------------------------------------------------------|-------------------------|
|        |                                         | Word] OR PFP[Text Word] OR tendinitis[Text Word] OR cervical[Text Word] OR jaw[Text Word] OR limb[Text Word] OR shoulder[Text Word] OR arm[Text Word] OR elbow[Text Word] OR wrist[Text Word] OR carpal[Text Word] OR hand[Text Word] OR finger[Text Word] OR collar[Text Word] OR vertebral[Text Word] OR lumbar[Text Word] OR back[Text Word] OR backache[Text Word] OR back pain[Text Word] OR headache[Text Word] OR hip[Text Word] OR knee[Text Word] OR patella*[Text Word] OR patellofemoral[Text Word] OR retropatellar[Text Word] OR leg[Text Word] OR ankle[Text Word] OR foot[Text Word] OR heel[Text Word] OR arthralgia[Text Word] OR osteochondritis[Text Word] OR osgood[Text Word] OR growing pain*[Text Word] OR scheuermann[Text Word])) OR ((backache[Text Word] OR headache[Text Word])) OR (((pain[Text Word] OR ache[Text Word])) AND (musculoskeletal[Text Word] OR back[Text Word] OR joint[Text Word] OR PFP[Text Word] OR tendinitis[Text Word] OR cervical[Text Word] OR jaw[Text Word] OR limb[Text Word] OR shoulder[Text Word] OR arm[Text Word] OR elbow[Text Word] OR wrist[Text Word] OR carpal[Text Word] OR hand[Text Word] OR finger[Text Word] OR collar[Text Word] OR vertebral[Text Word] OR lumbar[Text Word] OR hip[Text Word] OR knee[Text Word] OR patella*[Text Word] OR patellofemoral[Text Word] OR retropatellar[Text Word] OR leg[Text Word] OR ankle[Text Word] OR foot[Text Word] OR heel[Text Word] OR arthralgia[Text Word] OR osteochondritis[Text Word] OR osgood[Text Word] OR growing pain*[Text Word] OR scheuermann[Text Word])))) AND (((juvenile[Text Word] OR adolescen*[Text Word] OR preadolescence[Text Word] OR Preadolescent[Text Word] OR preschool[Text Word] OR child[Text Word] OR children[Text Word] OR prepubertal[Text Word] OR kids[Text Word] OR paediatric[Text Word] OR pediatric[Text Word] OR youth[Text Word] OR young[Text Word] OR childhood[Text Word] OR schoolchild*[Text Word] OR teenager[Text Word])) OR (((("Adolescent"[Mesh]) OR "Child"[Mesh]) OR "Infant"[Mesh]))) AND ((predict*[Text Word] OR long term[Text Word] OR Follow-up[Text Word] OR Prospective[Text Word] OR cohort[Text Word] OR cluster[Text Word] OR prognosis[Text Word] OR prognostic[Text Word] OR Mediator*[Text Word] OR treatment effect modifier*[Text Word] OR longitudinal*[Text Word])) |                         |
|        | <a href="#">#42</a> <a href="#">Add</a> | Search (predict*[Text Word] OR long term[Text Word] OR Follow-up[Text Word] OR Prospective[Text Word] OR cohort[Text Word] OR cluster[Text Word] OR prognosis[Text Word] OR prognostic[Text Word] OR Mediator*[Text Word] OR treatment effect modifier*[Text Word] OR longitudinal*[Text Word])                                                                                                                                                                                                                                                                                                                                                                                                                                                                                                                                                                                                                                                                                                                                                                                                                                                                                                                                                                                                                                                                                                                                                                                                                                                                                                                                                                                                                                                                                                                                                                                                                                                                                                                                                                                                                                                                                                                                                                                                                                                                 | <a href="#">4564026</a> |
|        | <a href="#">#41</a> <a href="#">Add</a> | Search (((((((((((("Back Pain"[Mesh:NoExp]) OR "Musculoskeletal Pain"[Mesh]) OR "Abdominal Pain"[Mesh:NoExp]) OR "Low Back Pain"[Mesh]) OR "Arthralgia"[Mesh]) OR "Chest Pain"[Mesh]) OR "Facial Pain"[Mesh:NoExp]) OR "Flank Pain"[Mesh]) OR "Metatarsalgia"[Mesh:NoExp]) OR "Neck Pain"[Mesh])) OR (((("Acute Pain"[Mesh]) OR "Chronic Pain"[Mesh]) OR "Breakthrough Pain"[Mesh]) OR "Pain, Intractable"[Mesh]) OR "Pain, Referred"[Mesh])) AND ((musculoskeletal[Text Word] OR back pain[Text Word] OR backache[Text Word] OR headache[Text Word] OR joint[Text Word] OR PFP[Text Word] OR tendinitis[Text Word] OR cervical[Text Word] OR jaw[Text Word] OR limb[Text Word] OR shoulder[Text Word] OR arm[Text Word] OR elbow[Text Word] OR wrist[Text Word] OR carpal[Text Word] OR hand[Text Word] OR finger[Text Word] OR collar[Text Word] OR vertebral[Text Word] OR lumbar[Text Word] OR back[Text Word] OR backache[Text Word] OR back pain[Text Word] OR headache[Text Word] OR hip[Text Word] OR knee[Text Word] OR patella*[Text Word] OR patellofemoral[Text Word] OR retropatellar[Text Word] OR leg[Text Word] OR ankle[Text Word] OR foot[Text Word] OR heel[Text Word] OR arthralgia[Text Word] OR osteochondritis[Text Word] OR osgood[Text Word] OR growing pain*[Text Word] OR scheuermann[Text Word])))) OR ((backache[Text Word] OR headache[Text Word])) OR (((pain[Text Word] OR ache[Text Word])) AND (musculoskeletal[Text Word] OR back[Text Word] OR joint[Text Word] OR PFP[Text Word] OR tendinitis[Text Word] OR cervical[Text Word] OR jaw[Text Word] OR limb[Text Word] OR shoulder[Text Word]                                                                                                                                                                                                                                                                                                                                                                                                                                                                                                                                                                                                                                                                                                                               | <a href="#">83258</a>   |

| Search | Add to builder      | Query                                                                                                                                                                                                                                                                                                                                                                                                                                                                                                                                                                                                                                                                                                                                                                                                                                                                                                                                                                                                                                                                                                                                                                                                                                                                                                                                                                                                                                                                                                                                                                                                                                                                                                                                                                                                                                                                                                                                                                                                                                                                                                                                                              | Items found             |
|--------|---------------------|--------------------------------------------------------------------------------------------------------------------------------------------------------------------------------------------------------------------------------------------------------------------------------------------------------------------------------------------------------------------------------------------------------------------------------------------------------------------------------------------------------------------------------------------------------------------------------------------------------------------------------------------------------------------------------------------------------------------------------------------------------------------------------------------------------------------------------------------------------------------------------------------------------------------------------------------------------------------------------------------------------------------------------------------------------------------------------------------------------------------------------------------------------------------------------------------------------------------------------------------------------------------------------------------------------------------------------------------------------------------------------------------------------------------------------------------------------------------------------------------------------------------------------------------------------------------------------------------------------------------------------------------------------------------------------------------------------------------------------------------------------------------------------------------------------------------------------------------------------------------------------------------------------------------------------------------------------------------------------------------------------------------------------------------------------------------------------------------------------------------------------------------------------------------|-------------------------|
|        |                     | Word] OR arm[Text Word] OR elbow[Text Word] OR wrist[Text Word] OR carpal[Text Word] OR hand[Text Word] OR finger[Text Word] OR collar[Text Word] OR vertebral[Text Word] OR lumbar[Text Word] OR hip[Text Word] OR knee[Text Word] OR patella*[Text Word] OR patellofemoral[Text Word] OR retropatellar[Text Word] OR leg[Text Word] OR ankle[Text Word] OR foot[Text Word] OR heel[Text Word] OR arthralgia[Text Word] OR osteochondritis[Text Word] OR osgood[Text Word] OR growing pain*[Text Word] OR scheuermann[Text Word]))) AND (((juvenile[Text Word] OR adolescen*[Text Word] OR preadolescence[Text Word] OR Preadolescent[Text Word] OR preschool[Text Word] OR child[Text Word] OR children[Text Word] OR prepubertal[Text Word] OR kids[Text Word] OR paediatric[Text Word] OR pediatric[Text Word] OR youth[Text Word] OR young[Text Word] OR childhood[Text Word] OR schoolchild*[Text Word] OR teenager[Text Word]))) OR ((("Adolescent"[Mesh]) OR "Child"[Mesh]) OR "Infant"[Mesh]))                                                                                                                                                                                                                                                                                                                                                                                                                                                                                                                                                                                                                                                                                                                                                                                                                                                                                                                                                                                                                                                                                                                                                            |                         |
| #40    | <a href="#">Add</a> | Search (((juvenile[Text Word] OR adolescen*[Text Word] OR preadolescence[Text Word] OR Preadolescent[Text Word] OR preschool[Text Word] OR child[Text Word] OR children[Text Word] OR prepubertal[Text Word] OR kids[Text Word] OR paediatric[Text Word] OR pediatric[Text Word] OR youth[Text Word] OR young[Text Word] OR childhood[Text Word] OR schoolchild*[Text Word] OR teenager[Text Word]))) OR ((("Adolescent"[Mesh]) OR "Child"[Mesh]) OR "Infant"[Mesh]))                                                                                                                                                                                                                                                                                                                                                                                                                                                                                                                                                                                                                                                                                                                                                                                                                                                                                                                                                                                                                                                                                                                                                                                                                                                                                                                                                                                                                                                                                                                                                                                                                                                                                              | <a href="#">4321275</a> |
| #39    | <a href="#">Add</a> | Search (juvenile[Text Word] OR adolescen*[Text Word] OR preadolescence[Text Word] OR Preadolescent[Text Word] OR preschool[Text Word] OR child[Text Word] OR children[Text Word] OR prepubertal[Text Word] OR kids[Text Word] OR paediatric[Text Word] OR pediatric[Text Word] OR youth[Text Word] OR young[Text Word] OR childhood[Text Word] OR schoolchild*[Text Word] OR teenager[Text Word])                                                                                                                                                                                                                                                                                                                                                                                                                                                                                                                                                                                                                                                                                                                                                                                                                                                                                                                                                                                                                                                                                                                                                                                                                                                                                                                                                                                                                                                                                                                                                                                                                                                                                                                                                                  | <a href="#">3920419</a> |
| #38    | <a href="#">Add</a> | Search (("Adolescent"[Mesh]) OR "Child"[Mesh]) OR "Infant"[Mesh])                                                                                                                                                                                                                                                                                                                                                                                                                                                                                                                                                                                                                                                                                                                                                                                                                                                                                                                                                                                                                                                                                                                                                                                                                                                                                                                                                                                                                                                                                                                                                                                                                                                                                                                                                                                                                                                                                                                                                                                                                                                                                                  | <a href="#">3366738</a> |
| #31    | <a href="#">Add</a> | Search (((((((((((("Back Pain"[Mesh:NoExp]) OR "Musculoskeletal Pain"[Mesh]) OR "Abdominal Pain"[Mesh:NoExp]) OR "Low Back Pain"[Mesh]) OR "Arthralgia"[Mesh]) OR "Chest Pain"[Mesh]) OR "Facial Pain"[Mesh:NoExp]) OR "Flank Pain"[Mesh]) OR "Metatarsalgia"[Mesh:NoExp]) OR "Neck Pain"[Mesh]) OR (((((((("Acute Pain"[Mesh]) OR "Chronic Pain"[Mesh]) OR "Breakthrough Pain"[Mesh]) OR "Pain, Intractable"[Mesh]) OR "Pain, Referred"[Mesh])) AND ((musculoskeletal[Text Word] OR back pain[Text Word] OR backache[Text Word] OR headache[Text Word] OR joint[Text Word] OR PFP[Text Word] OR tendinitis[Text Word] OR cervical[Text Word] OR jaw[Text Word] OR limb[Text Word] OR shoulder[Text Word] OR arm[Text Word] OR elbow[Text Word] OR wrist[Text Word] OR carpal[Text Word] OR hand[Text Word] OR finger[Text Word] OR collar[Text Word] OR vertebral[Text Word] OR lumbar[Text Word] OR back[Text Word] OR backache[Text Word] OR back pain[Text Word] OR headache[Text Word] OR hip[Text Word] OR knee[Text Word] OR patella*[Text Word] OR patellofemoral[Text Word] OR retropatellar[Text Word] OR leg[Text Word] OR ankle[Text Word] OR foot[Text Word] OR heel[Text Word] OR arthralgia[Text Word] OR osteochondritis[Text Word] OR osgood[Text Word] OR growing pain*[Text Word] OR scheuermann[Text Word]))) OR ((backache[Text Word] OR headache[Text Word]))) OR (((pain[Text Word] OR ache[Text Word])) AND (musculoskeletal[Text Word] OR back[Text Word] OR joint[Text Word] OR PFP[Text Word] OR tendinitis[Text Word] OR cervical[Text Word] OR jaw[Text Word] OR limb[Text Word] OR shoulder[Text Word] OR arm[Text Word] OR elbow[Text Word] OR wrist[Text Word] OR carpal[Text Word] OR hand[Text Word] OR finger[Text Word] OR collar[Text Word] OR vertebral[Text Word] OR lumbar[Text Word] OR hip[Text Word] OR knee[Text Word] OR patella*[Text Word] OR patellofemoral[Text Word] OR retropatellar[Text Word] OR leg[Text Word] OR ankle[Text Word] OR foot[Text Word] OR heel[Text Word] OR arthralgia[Text Word] OR osteochondritis[Text Word] OR osgood[Text Word] OR growing pain*[Text Word] OR scheuermann[Text Word])) | <a href="#">380268</a>  |

| Search              | Add to builder      | Query                                                                                                                                                                                                                                                                                                                                                                                                                                                                                                                                                                                                                                                                                                                                                                                                                                                                                                                                                                                                                           | Items found             |
|---------------------|---------------------|---------------------------------------------------------------------------------------------------------------------------------------------------------------------------------------------------------------------------------------------------------------------------------------------------------------------------------------------------------------------------------------------------------------------------------------------------------------------------------------------------------------------------------------------------------------------------------------------------------------------------------------------------------------------------------------------------------------------------------------------------------------------------------------------------------------------------------------------------------------------------------------------------------------------------------------------------------------------------------------------------------------------------------|-------------------------|
| <a href="#">#30</a> | <a href="#">Add</a> | Search ((pain[Text Word] OR ache[Text Word])) AND (musculoskeletal[Text Word] OR back[Text Word] OR joint[Text Word] OR PFP[Text Word] OR tendinitis[Text Word] OR cervical[Text Word] OR jaw[Text Word] OR limb[Text Word] OR shoulder[Text Word] OR arm[Text Word] OR elbow[Text Word] OR wrist[Text Word] OR carpal[Text Word] OR hand[Text Word] OR finger[Text Word] OR collar[Text Word] OR vertebral[Text Word] OR lumbar[Text Word] OR hip[Text Word] OR knee[Text Word] OR patella*[Text Word] OR patellofemoral[Text Word] OR retropatellar[Text Word] OR leg[Text Word] OR ankle[Text Word] OR foot[Text Word] OR heel[Text Word] OR arthralgia[Text Word] OR osteochondritis[Text Word] OR osgood[Text Word] OR growing pain*[Text Word] OR scheuermann[Text Word])                                                                                                                                                                                                                                                 | <a href="#">231899</a>  |
| <a href="#">#29</a> | <a href="#">Add</a> | Search (backache[Text Word] OR headache[Text Word])                                                                                                                                                                                                                                                                                                                                                                                                                                                                                                                                                                                                                                                                                                                                                                                                                                                                                                                                                                             | <a href="#">81147</a>   |
| <a href="#">#28</a> | <a href="#">Add</a> | Search (((("Acute Pain"[Mesh]) OR "Chronic Pain"[Mesh]) OR "Breakthrough Pain"[Mesh]) OR "Pain, Intractable"[Mesh]) OR "Pain, Referred"[Mesh])) AND ((musculoskeletal[Text Word] OR back pain[Text Word] OR backache[Text Word] OR headache[Text Word] OR joint[Text Word] OR PFP[Text Word] OR tendinitis[Text Word] OR cervical[Text Word] OR jaw[Text Word] OR limb[Text Word] OR shoulder[Text Word] OR arm[Text Word] OR elbow[Text Word] OR wrist[Text Word] OR carpal[Text Word] OR hand[Text Word] OR finger[Text Word] OR collar[Text Word] OR vertebral[Text Word] OR lumbar[Text Word] OR back[Text Word] OR backache[Text Word] OR back pain[Text Word] OR headache[Text Word] OR hip[Text Word] OR knee[Text Word] OR patella*[Text Word] OR patellofemoral[Text Word] OR retropatellar[Text Word] OR leg[Text Word] OR ankle[Text Word] OR foot[Text Word] OR heel[Text Word] OR arthralgia[Text Word] OR osteochondritis[Text Word] OR osgood[Text Word] OR growing pain*[Text Word] OR scheuermann[Text Word])) | <a href="#">5826</a>    |
| <a href="#">#27</a> | <a href="#">Add</a> | Search (musculoskeletal[Text Word] OR back pain[Text Word] OR backache[Text Word] OR headache[Text Word] OR joint[Text Word] OR PFP[Text Word] OR tendinitis[Text Word] OR cervical[Text Word] OR jaw[Text Word] OR limb[Text Word] OR shoulder[Text Word] OR arm[Text Word] OR elbow[Text Word] OR wrist[Text Word] OR carpal[Text Word] OR hand[Text Word] OR finger[Text Word] OR collar[Text Word] OR vertebral[Text Word] OR lumbar[Text Word] OR back[Text Word] OR backache[Text Word] OR back pain[Text Word] OR headache[Text Word] OR hip[Text Word] OR knee[Text Word] OR patella*[Text Word] OR patellofemoral[Text Word] OR retropatellar[Text Word] OR leg[Text Word] OR ankle[Text Word] OR foot[Text Word] OR heel[Text Word] OR arthralgia[Text Word] OR osteochondritis[Text Word] OR osgood[Text Word] OR growing pain*[Text Word] OR scheuermann[Text Word])                                                                                                                                                | <a href="#">2077798</a> |
| <a href="#">#26</a> | <a href="#">Add</a> | Search (((("Acute Pain"[Mesh]) OR "Chronic Pain"[Mesh]) OR "Breakthrough Pain"[Mesh]) OR "Pain, Intractable"[Mesh]) OR "Pain, Referred"[Mesh])                                                                                                                                                                                                                                                                                                                                                                                                                                                                                                                                                                                                                                                                                                                                                                                                                                                                                  | <a href="#">19040</a>   |
| <a href="#">#19</a> | <a href="#">Add</a> | Search (((((((("Back Pain"[Mesh:NoExp]) OR "Musculoskeletal Pain"[Mesh]) OR "Abdominal Pain"[Mesh:NoExp]) OR "Low Back Pain"[Mesh]) OR "Arthralgia"[Mesh]) OR "Chest Pain"[Mesh]) OR "Facial Pain"[Mesh:NoExp]) OR "Flank Pain"[Mesh]) OR "Metatarsalgia"[Mesh:NoExp]) OR "Neck Pain"[Mesh])                                                                                                                                                                                                                                                                                                                                                                                                                                                                                                                                                                                                                                                                                                                                    | <a href="#">133062</a>  |

Embase.com 31.05.2017-01.02.2019

| No. | Query                                                                                                                                                                                                                                                                                                                                                                                                                                                                                                                                                                                                                                                                                                                           | Results |
|-----|---------------------------------------------------------------------------------------------------------------------------------------------------------------------------------------------------------------------------------------------------------------------------------------------------------------------------------------------------------------------------------------------------------------------------------------------------------------------------------------------------------------------------------------------------------------------------------------------------------------------------------------------------------------------------------------------------------------------------------|---------|
| #29 | #28 AND [31-5-2017]/sd                                                                                                                                                                                                                                                                                                                                                                                                                                                                                                                                                                                                                                                                                                          | 3306    |
| #28 | #24 NOT #27                                                                                                                                                                                                                                                                                                                                                                                                                                                                                                                                                                                                                                                                                                                     | 25542   |
| #27 | #25 OR #26                                                                                                                                                                                                                                                                                                                                                                                                                                                                                                                                                                                                                                                                                                                      | 18603   |
| #26 | #24 AND ('case report'/de OR 'systematic review'/de OR 'meta analysis'/de)                                                                                                                                                                                                                                                                                                                                                                                                                                                                                                                                                                                                                                                      | 11517   |
| #25 | #24 AND ('Conference Abstract'/it OR 'Editorial'/it OR 'Letter'/it)                                                                                                                                                                                                                                                                                                                                                                                                                                                                                                                                                                                                                                                             | 9403    |
| #24 | #22 AND #23                                                                                                                                                                                                                                                                                                                                                                                                                                                                                                                                                                                                                                                                                                                     | 44145   |
| #23 | predict* OR 'long term' OR 'follow-up' OR prospective OR cohort OR cluster OR prognosis OR prognostic OR mediator* OR 'treatment effect modifier*' OR longitudinal*                                                                                                                                                                                                                                                                                                                                                                                                                                                                                                                                                             | 6151238 |
| #22 | #19 OR #21                                                                                                                                                                                                                                                                                                                                                                                                                                                                                                                                                                                                                                                                                                                      | 121885  |
| #21 | #18 AND #20                                                                                                                                                                                                                                                                                                                                                                                                                                                                                                                                                                                                                                                                                                                     | 82516   |
| #20 | juvenile:ti,ab,kw OR adolescen*:ti,ab,kw OR preadolescence:ti,ab,kw OR preadolescent:ti,ab,kw OR preschool:ti,ab,kw OR child:ti,ab,kw OR children:ti,ab,kw OR prepubertal:ti,ab,kw OR kids:ti,ab,kw OR paediatric:ti,ab,kw OR pediatric:ti,ab,kw OR youth:ti,ab,kw OR young:ti,ab,kw OR childhood:ti,ab,kw OR schoolchild*:ti,ab,kw OR teenager:ti,ab,kw                                                                                                                                                                                                                                                                                                                                                                        | 2498081 |
| #19 | #18 AND ([adolescent]/lim OR [child]/lim OR [infant]/lim OR [newborn]/lim OR [preschool]/lim OR [school]/lim)                                                                                                                                                                                                                                                                                                                                                                                                                                                                                                                                                                                                                   | 90443   |
| #18 | #8 OR #15 OR #16 OR #17                                                                                                                                                                                                                                                                                                                                                                                                                                                                                                                                                                                                                                                                                                         | 710948  |
| #17 | ((pain OR ache) NEAR/3 (musculoskeletal OR 'back pain' OR joint OR pfp OR tendinitis OR cervical OR jaw OR limb OR shoulder OR arm OR elbow OR wrist OR carpal OR hand OR finger OR collar OR vertebral OR lumbar OR back OR backache OR headache OR hip OR knee OR patella* OR patellofemoral OR retropatellar OR leg OR ankle OR foot OR heel OR arthralgia OR osteochondritis OR osgood OR 'growing pain*' OR scheuermann)):ti,ab,kw                                                                                                                                                                                                                                                                                         | 150092  |
| #16 | backache:ti,ab,kw,de OR headache:ti,ab,kw,de                                                                                                                                                                                                                                                                                                                                                                                                                                                                                                                                                                                                                                                                                    | 293040  |
| #15 | #13 AND #14                                                                                                                                                                                                                                                                                                                                                                                                                                                                                                                                                                                                                                                                                                                     | 17347   |
| #14 | musculoskeletal:ti,ab,kw OR 'back pain':ti,ab,kw OR joint:ti,ab,kw OR pfp:ti,ab,kw OR tendinitis:ti,ab,kw OR cervical:ti,ab,kw OR jaw:ti,ab,kw OR limb:ti,ab,kw OR shoulder:ti,ab,kw OR arm:ti,ab,kw OR elbow:ti,ab,kw OR wrist:ti,ab,kw OR carpal:ti,ab,kw OR hand:ti,ab,kw OR finger:ti,ab,kw OR collar:ti,ab,kw OR vertebral:ti,ab,kw OR lumbar:ti,ab,kw OR back:ti,ab,kw OR backache:ti,ab,kw OR headache:ti,ab,kw OR hip:ti,ab,kw OR knee:ti,ab,kw OR patella*:ti,ab,kw OR patellofemoral:ti,ab,kw OR retropatellar:ti,ab,kw OR leg:ti,ab,kw OR ankle:ti,ab,kw OR foot:ti,ab,kw OR heel:ti,ab,kw OR arthralgia:ti,ab,kw OR osteochondritis:ti,ab,kw OR osgood:ti,ab,kw OR 'growing pain*':ti,ab,kw OR scheuermann:ti,ab,kw | 2376662 |
| #13 | #9 OR #10 OR #11 OR #12                                                                                                                                                                                                                                                                                                                                                                                                                                                                                                                                                                                                                                                                                                         | 59894   |
| #12 | 'referred pain'/exp                                                                                                                                                                                                                                                                                                                                                                                                                                                                                                                                                                                                                                                                                                             | 1091    |
| #11 | 'intractable pain'/exp                                                                                                                                                                                                                                                                                                                                                                                                                                                                                                                                                                                                                                                                                                          | 4650    |
| #10 | 'breakthrough pain'/exp                                                                                                                                                                                                                                                                                                                                                                                                                                                                                                                                                                                                                                                                                                         | 1346    |
| #9  | 'chronic pain'/exp                                                                                                                                                                                                                                                                                                                                                                                                                                                                                                                                                                                                                                                                                                              | 53614   |
| #8  | #1 OR #2 OR #3 OR #4 OR #5 OR #6 OR #7                                                                                                                                                                                                                                                                                                                                                                                                                                                                                                                                                                                                                                                                                          | 628050  |
| #7  | 'metatarsalgia'/exp                                                                                                                                                                                                                                                                                                                                                                                                                                                                                                                                                                                                                                                                                                             | 1188    |
| #6  | 'arthralgia'/exp                                                                                                                                                                                                                                                                                                                                                                                                                                                                                                                                                                                                                                                                                                                | 54706   |
| #5  | 'thorax pain'/exp                                                                                                                                                                                                                                                                                                                                                                                                                                                                                                                                                                                                                                                                                                               | 79342   |
| #4  | 'flank pain'/exp                                                                                                                                                                                                                                                                                                                                                                                                                                                                                                                                                                                                                                                                                                                | 6334    |
| #3  | 'abdominal pain'/exp                                                                                                                                                                                                                                                                                                                                                                                                                                                                                                                                                                                                                                                                                                            | 148863  |
| #2  | 'headache and facial pain'/exp                                                                                                                                                                                                                                                                                                                                                                                                                                                                                                                                                                                                                                                                                                  | 284304  |
| #1  | 'musculoskeletal pain'/exp                                                                                                                                                                                                                                                                                                                                                                                                                                                                                                                                                                                                                                                                                                      | 136136  |

## CINAHL (EBSCONet) 01.06.2017-01.02.2019

| Search ID# | Search Terms                                                                                                                                                                                                                                                                                                                                                                                                                            | Search Options                                                                                                                                                                       | Results   |
|------------|-----------------------------------------------------------------------------------------------------------------------------------------------------------------------------------------------------------------------------------------------------------------------------------------------------------------------------------------------------------------------------------------------------------------------------------------|--------------------------------------------------------------------------------------------------------------------------------------------------------------------------------------|-----------|
| S19        | s16 not s17                                                                                                                                                                                                                                                                                                                                                                                                                             | Limiters - Published Date: 20170601-20191231<br>Search modes - Boolean/Phrase                                                                                                        | 971       |
| S18        | s16 not s17                                                                                                                                                                                                                                                                                                                                                                                                                             | Search modes - Boolean/Phrase                                                                                                                                                        | 7,109     |
| S17        | PT (Systematic Review or Meta Analysis)                                                                                                                                                                                                                                                                                                                                                                                                 | Search modes - Boolean/Phrase                                                                                                                                                        | 87,387    |
| S16        | S14 AND S15                                                                                                                                                                                                                                                                                                                                                                                                                             | Search modes - Boolean/Phrase                                                                                                                                                        | 7,276     |
| S15        | (predict* or long term or Follow-up or Prospective or cohort or cluster or prognosis or prognostic or Mediator* or treatment effect modifier* or longitudinal*)                                                                                                                                                                                                                                                                         | Search modes - Boolean/Phrase                                                                                                                                                        | 1,025,399 |
| S14        | S11 OR S13                                                                                                                                                                                                                                                                                                                                                                                                                              | Search modes - Boolean/Phrase                                                                                                                                                        | 21,414    |
| S13        | S10 AND S12                                                                                                                                                                                                                                                                                                                                                                                                                             | Search modes - Boolean/Phrase                                                                                                                                                        | 21,266    |
| S12        | (juvenile or adolescen* or preadolescence or Preadolescent or preschool or child or children or prepubertal or kids or paediatric or pediatric or youth or young or childhood or schoolchild* or teenager)                                                                                                                                                                                                                              | Search modes - Boolean/Phrase                                                                                                                                                        | 1,048,327 |
| S11        | S1 OR S7 OR S8 OR S9                                                                                                                                                                                                                                                                                                                                                                                                                    | Limiters - Age Groups: Infant, Newborn: birth-1 month, Infant: 1-23 months, Child, Preschool: 2-5 years, Child: 6-12 years, Adolescent: 13-18 years<br>Search modes - Boolean/Phrase | 15,463    |
| S10        | S1 OR S7 OR S8 OR S9                                                                                                                                                                                                                                                                                                                                                                                                                    | Search modes - Boolean/Phrase                                                                                                                                                        | 107,547   |
| S9         | ((pain or ache) N3 (musculoskeletal or back or joint or PFP or tendinitis or cervical or jaw or limb or shoulder or arm or elbow or wrist or carpal or hand or finger or collar or vertebral or lumbar or hip or knee or patella* or patellofemoral or retropatellar or leg or ankle or foot or heel or arthralgia or osteochondritis or osgood or growing pain* or scheuermann))                                                       | Search modes - Boolean/Phrase                                                                                                                                                        | 61,789    |
| S8         | backache or headache                                                                                                                                                                                                                                                                                                                                                                                                                    | Search modes - Boolean/Phrase                                                                                                                                                        | 26,017    |
| S7         | S5 AND S6                                                                                                                                                                                                                                                                                                                                                                                                                               | Search modes - Boolean/Phrase                                                                                                                                                        | 7,112     |
| S6         | (musculoskeletal or back pain or backache or headache or joint or PFP or tendinitis or cervical or jaw or limb or shoulder or arm or elbow or wrist or carpal or hand or finger or collar or vertebral or lumbar or back or backache or back pain or headache or hip or knee or patella* or patellofemoral or retropatellar or leg or ankle or foot or heel or arthralgia or osteochondritis or osgood or growing pain* or scheuermann) | Search modes - Boolean/Phrase                                                                                                                                                        | 542,363   |
| S5         | S2 OR S3 OR S4                                                                                                                                                                                                                                                                                                                                                                                                                          | Search modes - Boolean/Phrase                                                                                                                                                        | 18,849    |
| S4         | (MH "Referred Pain")                                                                                                                                                                                                                                                                                                                                                                                                                    | Search modes - Boolean/Phrase                                                                                                                                                        | 406       |



|    |                                                                                                                                                                                                                                                                                                              |                               |        |
|----|--------------------------------------------------------------------------------------------------------------------------------------------------------------------------------------------------------------------------------------------------------------------------------------------------------------|-------------------------------|--------|
| S3 | (MH "Breakthrough Pain")                                                                                                                                                                                                                                                                                     | Search modes - Boolean/Phrase | 128    |
| S2 | (MH "Chronic Pain")                                                                                                                                                                                                                                                                                          | Search modes - Boolean/Phrase | 18,360 |
| S1 | (MH "Back Pain") OR (MH "Low Back Pain") OR (MH "Facial Pain") OR (MH "Headache") OR (MH "Knee Pain+") OR (MH "Metatarsalgia") OR (MH "Muscle Pain") OR (MH "Neck Pain") OR (MH "Arthralgia") OR (MH "Shoulder Pain") OR (MH "Chest Pain") OR (MH "Elbow Pain") OR (MH "Heel Pain") OR (MH "Abdominal Pain") | Search modes - Boolean/Phrase | 66,335 |

Web of Science 2017-11.02.2019

| Set  | Results   |                                                                                                                                                                                                                                                                                                                                                                                                                                                      | Save History / Create Alert | Open Saved History | Edit Sets | Combine Sets<br>AND OR<br>Combine | Delete Sets<br>Select All<br>Delete |
|------|-----------|------------------------------------------------------------------------------------------------------------------------------------------------------------------------------------------------------------------------------------------------------------------------------------------------------------------------------------------------------------------------------------------------------------------------------------------------------|-----------------------------|--------------------|-----------|-----------------------------------|-------------------------------------|
| # 10 | 2,497     | #8 AND #7<br>Refined by: PUBLICATION YEARS: ( 2019 OR 2018 OR 2017 )<br>Indexes=SCI-EXPANDED, SSCI, A&HCI, CPCI-S, CPCI-SSH, ESCI Timespan=All years                                                                                                                                                                                                                                                                                                 |                             |                    |           | <input type="checkbox"/>          | <input type="checkbox"/>            |
| # 9  | 13,842    | #8 AND #7<br>Indexes=SCI-EXPANDED, SSCI, A&HCI, CPCI-S, CPCI-SSH, ESCI Timespan=All years                                                                                                                                                                                                                                                                                                                                                            |                             |                    | Edit      | <input type="checkbox"/>          | <input type="checkbox"/>            |
| # 8  | 6,829,939 | TOPIC: (predict* or long term or Follow-up or Prospective or cohort or cluster or prognosis or prognostic or Mediator* or treatment effect modifier* or longitudinal*)<br>Indexes=SCI-EXPANDED, SSCI, A&HCI, CPCI-S, CPCI-SSH, ESCI Timespan=All years                                                                                                                                                                                               |                             |                    | Edit      | <input type="checkbox"/>          | <input type="checkbox"/>            |
| # 7  | 34,837    | #6 AND #5<br>Indexes=SCI-EXPANDED, SSCI, A&HCI, CPCI-S, CPCI-SSH, ESCI Timespan=All years                                                                                                                                                                                                                                                                                                                                                            |                             |                    | Edit      | <input type="checkbox"/>          | <input type="checkbox"/>            |
| # 6  | 2,803,621 | TOPIC: ((juvenile or adolescen* or preadolescence or Preadolescent or preschool or child or children or prepubertal or kids or paediatric or pediatric or youth or young or childhood or schoolchild* or teenager))<br>Indexes=SCI-EXPANDED, SSCI, A&HCI, CPCI-S, CPCI-SSH, ESCI Timespan=All years                                                                                                                                                  |                             |                    | Edit      | <input type="checkbox"/>          | <input type="checkbox"/>            |
| # 5  | 282,070   | #4 OR #3<br>Indexes=SCI-EXPANDED, SSCI, A&HCI, CPCI-S, CPCI-SSH, ESCI Timespan=All years                                                                                                                                                                                                                                                                                                                                                             |                             |                    | Edit      | <input type="checkbox"/>          | <input type="checkbox"/>            |
| # 4  | 74,839    | TOPIC: (backache or headache)<br>Indexes=SCI-EXPANDED, SSCI, A&HCI, CPCI-S, CPCI-SSH, ESCI Timespan=All years                                                                                                                                                                                                                                                                                                                                        |                             |                    | Edit      | <input type="checkbox"/>          | <input type="checkbox"/>            |
| # 3  | 214,291   | #2 AND #1<br>Indexes=SCI-EXPANDED, SSCI, A&HCI, CPCI-S, CPCI-SSH, ESCI Timespan=All years                                                                                                                                                                                                                                                                                                                                                            |                             |                    | Edit      | <input type="checkbox"/>          | <input type="checkbox"/>            |
| # 2  | 2,932,366 | TOPIC: (musculoskeletal or back or joint or PFP or tendinitis or cervical or jaw or limb or shoulder or arm or elbow or wrist or carpal or hand or finger or collar or vertebral or lumbar or hip or knee or patella* or patellofemoral or retropatellar or leg or ankle or foot or heel or arthralgia or osteochondritis or osgood or growing pain* or scheuermann)<br>Indexes=SCI-EXPANDED, SSCI, A&HCI, CPCI-S, CPCI-SSH, ESCI Timespan=All years |                             |                    | Edit      | <input type="checkbox"/>          | <input type="checkbox"/>            |
| # 1  | 573,235   | TOPIC: (pain OR ache)<br>Indexes=SCI-EXPANDED, SSCI, A&HCI, CPCI-S, CPCI-SSH, ESCI Timespan=All years                                                                                                                                                                                                                                                                                                                                                |                             |                    | Edit      | <input type="checkbox"/>          | <input type="checkbox"/>            |
|      |           |                                                                                                                                                                                                                                                                                                                                                                                                                                                      |                             |                    |           | AND OR<br>Combine                 | Select All<br>Delete                |

PsycInfo 2017-11.02.2019

|   |                                                                                                                                                                                                                                                                                             |        |
|---|---------------------------------------------------------------------------------------------------------------------------------------------------------------------------------------------------------------------------------------------------------------------------------------------|--------|
| 1 | exp Musculoskeletal Disorders/                                                                                                                                                                                                                                                              | 16869  |
| 2 | headache/ or muscle contraction headache/                                                                                                                                                                                                                                                   | 7319   |
| 3 | myofascial pain/                                                                                                                                                                                                                                                                            | 329    |
| 4 | back pain/                                                                                                                                                                                                                                                                                  | 3655   |
| 5 | 1 or 2 or 3 or 4                                                                                                                                                                                                                                                                            | 27350  |
| 6 | chronic pain/                                                                                                                                                                                                                                                                               | 12511  |
| 7 | pain/                                                                                                                                                                                                                                                                                       | 23687  |
| 8 | 6 or 7                                                                                                                                                                                                                                                                                      | 35477  |
| 9 | (musculoskeletal or back pain or backache or headache or joint or PFP or tendinitis or cervical or jaw or limb or shoulder or arm or elbow or wrist or carpal or hand or finger or collar or vertebral or lumbar or back or backache or back pain or headache or hip or knee or patella* or | 238846 |

|    |                                                                                                                                                                                                                                                                                                                                                                                         |        |
|----|-----------------------------------------------------------------------------------------------------------------------------------------------------------------------------------------------------------------------------------------------------------------------------------------------------------------------------------------------------------------------------------------|--------|
|    | patellofemoral or retropatellar or leg or ankle or foot or heel or arthralgia or osteochondritis or osgood or growing pain* or scheuermann).mp.                                                                                                                                                                                                                                         |        |
| 10 | 8 and 9                                                                                                                                                                                                                                                                                                                                                                                 | 9902   |
| 11 | (backache or headache).mp.                                                                                                                                                                                                                                                                                                                                                              | 19554  |
| 12 | ((pain or ache) adj3 (musculoskeletal or back or joint or PFP or tendinitis or cervical or jaw or limb or shoulder or arm or elbow or wrist or carpal or hand or finger or collar or vertebral or lumbar or hip or knee or patella* or patellofemoral or retropatellar or leg or ankle or foot or heel or arthralgia or osteochondritis or osgood or growing pain* or scheuermann)).mp. | 10225  |
| 13 | 5 or 10 or 11 or 12                                                                                                                                                                                                                                                                                                                                                                     | 46619  |
| 14 | limit 13 to (100 childhood <birth to age 12 yrs> or 200 adolescence <age 13 to 17 yrs>)                                                                                                                                                                                                                                                                                                 | 5926   |
| 15 | (juvenile or adolescen* or preadolescence or Preadolescent or preschool or child or children or prepubertal or kids or paediatric or pediatric or youth or young or childhood or schoolchild* or teenager).mp.                                                                                                                                                                          | 961911 |
| 16 | 13 and 15                                                                                                                                                                                                                                                                                                                                                                               | 5867   |
| 17 | 14 or 16                                                                                                                                                                                                                                                                                                                                                                                | 8172   |
| 18 | (predict* or long term or Follow-up or Prospective or cohort or cluster or prognosis or prognostic or Mediator* or treatment effect modifier* or longitudinal*).mp.                                                                                                                                                                                                                     | 798327 |
| 19 | 17 and 18                                                                                                                                                                                                                                                                                                                                                                               | 2298   |
| 20 | ((systematic or method*) adj3 (review* or overview* or study or studies or search* or approach*)) or meta analy* or meta-analy* or metaanaly*).ti,ab,id.                                                                                                                                                                                                                                | 166163 |
| 21 | limit 19 to ("0830 systematic review" or 1200 meta analysis)                                                                                                                                                                                                                                                                                                                            | 45     |
| 22 | 20 or 21                                                                                                                                                                                                                                                                                                                                                                                | 166166 |
| 23 | 19 not 22                                                                                                                                                                                                                                                                                                                                                                               | 2130   |
| 24 | limit 23 to yr="2017 -Current"                                                                                                                                                                                                                                                                                                                                                          | 180    |

#### Cochrane Library juni 2017-11.02.2019

| ID | Search                                                                                                                                                                                                                                                                                                                                                                                                                                                          | Hits   |
|----|-----------------------------------------------------------------------------------------------------------------------------------------------------------------------------------------------------------------------------------------------------------------------------------------------------------------------------------------------------------------------------------------------------------------------------------------------------------------|--------|
| #1 | ((pain or ache) next/3 (musculoskeletal or back pain or backache or headache or joint or PFP or tendinitis or cervical or jaw or limb or shoulder or arm or elbow or wrist or carpal or hand or finger or collar or vertebral or lumbar or back or backache or back pain or headache or hip or knee or patella* or patellofemoral or retropatellar or leg or ankle or foot or heel or arthralgia or osteochondritis or osgood or growing pain* or scheuermann)) | 42928  |
| #2 | (backache or headache)                                                                                                                                                                                                                                                                                                                                                                                                                                          | 27829  |
| #3 | #1 OR #2                                                                                                                                                                                                                                                                                                                                                                                                                                                        | 63886  |
| #4 | (juvenile or adolescen* or preadolescence or Preadolescent or preschool or child or children or prepubertal or kids or paediatric or pediatric or youth or young or childhood or schoolchild* or teenager)                                                                                                                                                                                                                                                      | 270643 |
| #5 | #3 AND #4                                                                                                                                                                                                                                                                                                                                                                                                                                                       | 17122  |
| #6 | (predict* or long term or Follow-up or Prospective or cohort or cluster or prognosis or prognostic or Mediator* or treatment effect modifier* or longitudinal*)                                                                                                                                                                                                                                                                                                 | 453684 |
| #7 | #5 AND #6 with Cochrane Library publication date Between Jun 2017 and Feb 2019                                                                                                                                                                                                                                                                                                                                                                                  | 1186   |

# Reporting checklist for systematic review and meta-analysis.

Based on the PRISMA guidelines.

## Instructions to authors

Complete this checklist by entering the page numbers from your manuscript where readers will find each of the items listed below.

Your article may not currently address all the items on the checklist. Please modify your text to include the missing information. If you are certain that an item does not apply, please write "n/a" and provide a short explanation.

Upload your completed checklist as an extra file when you submit to a journal.

In your methods section, say that you used the PRISMA reporting guidelines, and cite them as:

Moher D, Liberati A, Tetzlaff J, Altman DG, The PRISMA Group. Preferred Reporting Items for Systematic Reviews and Meta-Analyses: The PRISMA Statement

|                    |    | Reporting Item                                                                                                                                                                                                                                                                                             | Page Number |
|--------------------|----|------------------------------------------------------------------------------------------------------------------------------------------------------------------------------------------------------------------------------------------------------------------------------------------------------------|-------------|
|                    | #1 | Identify the report as a systematic review, meta-analysis, or both.                                                                                                                                                                                                                                        | 1           |
| Structured summary | #2 | Provide a structured summary including, as applicable: background; objectives; data sources; study eligibility criteria, participants, and interventions; study appraisal and synthesis methods; results; limitations; conclusions and implications of key findings; systematic review registration number | 2           |
| Rationale          | #3 | Describe the rationale for the review in the context of what is already known.                                                                                                                                                                                                                             | 3           |
| Objectives         | #4 | Provide an explicit statement of questions being addressed with reference to participants, interventions, comparisons, outcomes, and study design (PICOS).                                                                                                                                                 | 3           |
| Protocol and       | #5 | Indicate if a review protocol exists, if and where it can be                                                                                                                                                                                                                                               | 3           |

|    |                                    |     |                                                                                                                                                                                                                                 |   |
|----|------------------------------------|-----|---------------------------------------------------------------------------------------------------------------------------------------------------------------------------------------------------------------------------------|---|
| 1  | registration                       |     | accessed (e.g., Web address) and, if available, provide registration information including the registration number.                                                                                                             |   |
| 2  |                                    |     |                                                                                                                                                                                                                                 |   |
| 3  |                                    |     |                                                                                                                                                                                                                                 |   |
| 4  | Eligibility criteria               | #6  | Specify study characteristics (e.g., PICOS, length of follow-up) and report characteristics (e.g., years considered, language, publication status) used as criteria for eligibility, giving rational                            | 3 |
| 5  |                                    |     |                                                                                                                                                                                                                                 |   |
| 6  |                                    |     |                                                                                                                                                                                                                                 |   |
| 7  |                                    |     |                                                                                                                                                                                                                                 |   |
| 8  |                                    |     |                                                                                                                                                                                                                                 |   |
| 9  | Information sources                | #7  | Describe all information sources in the search (e.g., databases with dates of coverage, contact with study authors to identify additional studies) and date last searched.                                                      | 3 |
| 10 |                                    |     |                                                                                                                                                                                                                                 |   |
| 11 |                                    |     |                                                                                                                                                                                                                                 |   |
| 12 |                                    |     |                                                                                                                                                                                                                                 |   |
| 13 |                                    |     |                                                                                                                                                                                                                                 |   |
| 14 |                                    |     |                                                                                                                                                                                                                                 |   |
| 15 | Search                             | #8  | Present full electronic search strategy for at least one database, including any limits used, such that it could be repeated.                                                                                                   | 3 |
| 16 |                                    |     |                                                                                                                                                                                                                                 |   |
| 17 |                                    |     |                                                                                                                                                                                                                                 |   |
| 18 |                                    |     |                                                                                                                                                                                                                                 |   |
| 19 | Study selection                    | #9  | State the process for selecting studies (i.e., for screening, for determining eligibility, for inclusion in the systematic review, and, if applicable, for inclusion in the meta-analysis).                                     | 3 |
| 20 |                                    |     |                                                                                                                                                                                                                                 |   |
| 21 |                                    |     |                                                                                                                                                                                                                                 |   |
| 22 |                                    |     |                                                                                                                                                                                                                                 |   |
| 23 |                                    |     |                                                                                                                                                                                                                                 |   |
| 24 | Data collection process            | #10 | Describe the method of data extraction from reports (e.g., piloted forms, independently by two reviewers) and any processes for obtaining and confirming data from investigators.                                               | 4 |
| 25 |                                    |     |                                                                                                                                                                                                                                 |   |
| 26 |                                    |     |                                                                                                                                                                                                                                 |   |
| 27 |                                    |     |                                                                                                                                                                                                                                 |   |
| 28 |                                    |     |                                                                                                                                                                                                                                 |   |
| 29 |                                    |     |                                                                                                                                                                                                                                 |   |
| 30 | Data items                         | #11 | List and define all variables for which data were sought (e.g., PICOS, funding sources), and any assumptions and simplifications made.                                                                                          | 4 |
| 31 |                                    |     |                                                                                                                                                                                                                                 |   |
| 32 |                                    |     |                                                                                                                                                                                                                                 |   |
| 33 |                                    |     |                                                                                                                                                                                                                                 |   |
| 34 |                                    |     |                                                                                                                                                                                                                                 |   |
| 35 |                                    |     |                                                                                                                                                                                                                                 |   |
| 36 | Risk of bias in individual studies | #12 | Describe methods used for assessing risk of bias in individual studies (including specification of whether this was done at the study or outcome level, or both), and how this information is to be used in any data synthesis. | 4 |
| 37 |                                    |     |                                                                                                                                                                                                                                 |   |
| 38 |                                    |     |                                                                                                                                                                                                                                 |   |
| 39 |                                    |     |                                                                                                                                                                                                                                 |   |
| 40 |                                    |     |                                                                                                                                                                                                                                 |   |
| 41 |                                    |     |                                                                                                                                                                                                                                 |   |
| 42 |                                    |     |                                                                                                                                                                                                                                 |   |
| 43 | Summary measures                   | #13 | State the principal summary measures (e.g., risk ratio, difference in means).                                                                                                                                                   | 4 |
| 44 |                                    |     |                                                                                                                                                                                                                                 |   |
| 45 |                                    |     |                                                                                                                                                                                                                                 |   |
| 46 |                                    |     |                                                                                                                                                                                                                                 |   |
| 47 | Planned methods of analysis        | #14 | Describe the methods of handling data and combining results of studies, if done, including measures of consistency (e.g., I <sup>2</sup> ) for each meta-analysis.                                                              | 5 |
| 48 |                                    |     |                                                                                                                                                                                                                                 |   |
| 49 |                                    |     |                                                                                                                                                                                                                                 |   |
| 50 |                                    |     |                                                                                                                                                                                                                                 |   |
| 51 |                                    |     |                                                                                                                                                                                                                                 |   |
| 52 | Risk of bias across studies        | #15 | Specify any assessment of risk of bias that may affect the cumulative evidence (e.g., publication bias, selective reporting within studies).                                                                                    | 5 |
| 53 |                                    |     |                                                                                                                                                                                                                                 |   |
| 54 |                                    |     |                                                                                                                                                                                                                                 |   |
| 55 |                                    |     |                                                                                                                                                                                                                                 |   |
| 56 |                                    |     |                                                                                                                                                                                                                                 |   |
| 57 |                                    |     |                                                                                                                                                                                                                                 |   |
| 58 | Additional                         | #16 | Describe methods of additional analyses (e.g., sensitivity or                                                                                                                                                                   | 5 |
| 59 |                                    |     |                                                                                                                                                                                                                                 |   |

|    |                    |     |                                                                      |   |
|----|--------------------|-----|----------------------------------------------------------------------|---|
| 1  | analyses           |     | subgroup analyses, meta-regression), if done, indicating which       |   |
| 2  |                    |     | were pre-specified.                                                  |   |
| 3  |                    |     |                                                                      |   |
| 4  | Study selection    | #17 | Give numbers of studies screened, assessed for eligibility, and      | 5 |
| 5  |                    |     | included in the review, with reasons for exclusions at each stage,   |   |
| 6  |                    |     | ideally with a flow diagram.                                         |   |
| 7  |                    |     |                                                                      |   |
| 8  |                    |     |                                                                      |   |
| 9  | Study              | #18 | For each study, present characteristics for which data were          | 5 |
| 10 | characteristics    |     | extracted (e.g., study size, PICOS, follow-up period) and provide    |   |
| 11 |                    |     | the citation.                                                        |   |
| 12 |                    |     |                                                                      |   |
| 13 |                    |     |                                                                      |   |
| 14 |                    |     |                                                                      |   |
| 15 | Risk of bias       | #19 | Present data on risk of bias of each study and, if available, any    | 5 |
| 16 | within studies     |     | outcome-level assessment (see Item 12).                              |   |
| 17 |                    |     |                                                                      |   |
| 18 |                    |     |                                                                      |   |
| 19 | Results of         | #20 | For all outcomes considered (benefits and harms), present, for       | 5 |
| 20 | individual studies |     | each study: (a) simple summary data for each intervention group      |   |
| 21 |                    |     | and (b) effect estimates and confidence intervals, ideally with a    |   |
| 22 |                    |     | forest plot.                                                         |   |
| 23 |                    |     |                                                                      |   |
| 24 |                    |     |                                                                      |   |
| 25 |                    |     |                                                                      |   |
| 26 | Synthesis of       | #21 | Present the main results of the review. If meta-analyses are         | 5 |
| 27 | results            |     | done, include for each, confidence intervals and measures of         |   |
| 28 |                    |     | consistency.                                                         |   |
| 29 |                    |     |                                                                      |   |
| 30 |                    |     |                                                                      |   |
| 31 | Risk of bias       | #22 | Present results of any assessment of risk of bias across studies     | 5 |
| 32 | across studies     |     | (see Item 15).                                                       |   |
| 33 |                    |     |                                                                      |   |
| 34 |                    |     |                                                                      |   |
| 35 | Additional         | #23 | Give results of additional analyses, if done (e.g., sensitivity or   | 5 |
| 36 | analysis           |     | subgroup analyses, meta-regression [see Item 16]).                   |   |
| 37 |                    |     |                                                                      |   |
| 38 |                    |     |                                                                      |   |
| 39 | Summary of         | #24 | Summarize the main findings, including the strength of evidence      | 7 |
| 40 | Evidence           |     | for each main outcome; consider their relevance to key groups        |   |
| 41 |                    |     | (e.g., health care providers, users, and policy makers               |   |
| 42 |                    |     |                                                                      |   |
| 43 |                    |     |                                                                      |   |
| 44 |                    |     |                                                                      |   |
| 45 | Limitations        | #25 | Discuss limitations at study and outcome level (e.g., risk of bias), | 7 |
| 46 |                    |     | and at review level (e.g., incomplete retrieval of identified        |   |
| 47 |                    |     | research, reporting bias).                                           |   |
| 48 |                    |     |                                                                      |   |
| 49 |                    |     |                                                                      |   |
| 50 | Conclusions        | #26 | Provide a general interpretation of the results in the context of    | 7 |
| 51 |                    |     | other evidence, and implications for future research.                |   |
| 52 |                    |     |                                                                      |   |
| 53 |                    |     |                                                                      |   |
| 54 | Funding            | #27 | Describe sources of funding or other support (e.g., supply of        | 8 |
| 55 |                    |     | data) for the systematic review; role of funders for the systematic  |   |
| 56 |                    |     | review.                                                              |   |
| 57 |                    |     |                                                                      |   |
| 58 |                    |     |                                                                      |   |
| 59 |                    |     |                                                                      |   |
| 60 |                    |     |                                                                      |   |

1 The PRISMA checklist is distributed under the terms of the Creative Commons Attribution License  
2 CC-BY. This checklist was completed on 29. June 2018 using <http://www.goodreports.org/>, a tool  
3 made by the [EQUATOR Network](#) in collaboration with [Penelope.ai](#)  
4  
5  
6  
7  
8  
9  
10  
11  
12  
13  
14  
15  
16  
17  
18  
19  
20  
21  
22  
23  
24  
25  
26  
27  
28  
29  
30  
31  
32  
33  
34  
35  
36  
37  
38  
39  
40  
41  
42  
43  
44  
45  
46  
47  
48  
49  
50  
51  
52  
53  
54  
55  
56  
57  
58  
59  
60

For peer review only

## PROSPERO

### International prospective register of systematic reviews

UNIVERSITY of York  
Centre for Reviews and Dissemination

## Systematic review

Please complete all mandatory fields below (marked with an asterisk \*) and as many of the non-mandatory fields as you can then click *Submit* to submit your registration. You don't need to complete everything in one go, this record will appear in your *My PROSPERO* section of the web site and you can continue to edit it until you are ready to submit. Click *Show help* below or click on the icon to see guidance on completing each section.

This record cannot be edited because it has been rejected

### 1. \* Review title.

Give the working title of the review, for example the one used for obtaining funding. Ideally the title should state succinctly the interventions or exposures being reviewed and the associated health or social problems. Where appropriate, the title should use the PI(E)COS structure to contain information on the Participants, Intervention (or Exposure) and Comparison groups, the Outcomes to be measured and Study designs to be included.

Prognostic factors and treatment effect modifiers for children and adolescents with musculoskeletal pain: a protocol for a systematic literature review

### 2. Original language title.

For reviews in languages other than English, this field should be used to enter the title in the language of the review. This will be displayed together with the English language title.

### 3. \* Anticipated or actual start date.

Give the date when the systematic review commenced, or is expected to commence.

21/06/2016

### 4. \* Anticipated completion date.

Give the date by which the review is expected to be completed.

01/12/2017

### 5. \* Stage of review at time of this submission.

Indicate the stage of progress of the review by ticking the relevant Started and Completed boxes. Additional information may be added in the free text box provided.

Please note: Reviews that have progressed beyond the point of completing data extraction at the time of initial registration are not eligible for inclusion in PROSPERO. Should evidence of incorrect status and/or completion date being supplied at the time of submission come to light, the content of the PROSPERO record will be removed leaving only the title and named contact details and a statement that inaccuracies in the stage of the review date had been identified.

This field should be updated when any amendments are made to a published record and on completion and publication of the review.

The review has not yet started: No

## PROSPERO

### International prospective register of systematic reviews

| Review stage                                                    | Started | Completed |
|-----------------------------------------------------------------|---------|-----------|
| Preliminary searches                                            | Yes     | Yes       |
| Piloting of the study selection process                         | Yes     | Yes       |
| Formal screening of search results against eligibility criteria | Yes     | Yes       |
| Data extraction                                                 | Yes     | Yes       |
| Risk of bias (quality) assessment                               | Yes     | Yes       |
| Data analysis                                                   | Yes     | Yes       |

Provide any other relevant information about the stage of the review here (e.g. Funded proposal, protocol not yet finalised).

#### 6. \* Named contact.

The named contact acts as the guarantor for the accuracy of the information presented in the register record.

Negar Pourbordbari

Email salutation (e.g. "Dr Smith" or "Joanne") for correspondence:

#### 7. \* Named contact email.

Give the electronic mail address of the named contact.

negar@dcm.aau.dk

#### 8. Named contact address

Give the full postal address for the named contact.

Dr. Negar Pourbordbari

Research Unit of General Practice in Aalborg and Department of Clinical Medicine, Aalborg University

Fyrkildevvej 7, 9220 Aalborg

Denmark

#### 9. Named contact phone number.

Give the telephone number for the named contact, including international dialling code.

004527914224

#### 10. \* Organisational affiliation of the review.

Full title of the organisational affiliations for this review and website address if available. This field may be completed as 'None' if the review is not affiliated to any organisation.

Research Unit of General Practice in Aalborg and Department of Clinical Medicine, Aalborg University, Denmark

Organisation web address:

#### 11. Review team members and their organisational affiliations.

Give the title, first name, last name and the organisational affiliations of each member of the review team. Affiliation refers to groups or organisations to which review team members belong.



**PROSPERO****International prospective register of systematic reviews**

Dr Negar Pourbordbari. Research Unit of General Practice in Aalborg and Department of Clinical Medicine, Aalborg University, Denmark

Mr Allan Riis. Research Unit of General Practice in Aalborg and Department of Clinical Medicine, Aalborg University, Denmark

Professor Martin Bach Jensen. Research Unit of General Practice in Aalborg and Department of Clinical Medicine, Aalborg University, Denmark

Dr Jens Lykkegaard Olesen. The Faculty of Medicine Department of Clinical Medicine, Aalborg University, Denmark

Dr Michael Skovdal Rathleff. Research Unit of General Practice in Aalborg and Department of Clinical Medicine, Aalborg University, Denmark

**12. \* Funding sources/sponsors.**

Give details of the individuals, organizations, groups or other legal entities who take responsibility for initiating, managing, sponsoring and/or financing the review. Include any unique identification numbers assigned to the review by the individuals or bodies listed.

Research Unit of General Practice in Aalborg and Department of Clinical Medicine, Aalborg University, Denmark

**13. \* Conflicts of interest.**

List any conditions that could lead to actual or perceived undue influence on judgements concerning the main topic investigated in the review.

None

**14. Collaborators.**

Give the name and affiliation of any individuals or organisations who are working on the review but who are not listed as review team members.

**15. \* Review question.**

State the question(s) to be addressed by the review, clearly and precisely. Review questions may be specific or broad. It may be appropriate to break very broad questions down into a series of related more specific questions. Questions may be framed or refined using PI(E)COS where relevant.

The aim of this study is to conduct a systematic review on children and adolescents with musculoskeletal pain with a view to determining which baseline patient characteristics are associated with a poor outcome in follow-up regardless of which treatment has been provided (prognosis) or are associated with a successful outcome to a specific treatment (treatment effect modifiers).

Review question: What are the prognostic factors and treatment effect modifiers for children and adolescents with musculoskeletal pain?

**16. \* Searches.**

Give details of the sources to be searched, search dates (from and to), and any restrictions (e.g. language or publication period). The full search strategy is not required, but may be supplied as a link or attachment.

This systematic review search will be conducted in the following electronic databases: MEDLINE, Embase, CINAHL, Web of Science, Cochrane and SPORTDiscus without limitations on dates.

Articles reported in English, German, Danish, Norwegian, Swedish, French, Spanish, Japanese, Chinese, Thai, Arabic, Persian, Turkish and Hindi will be included.

The search strategy will be divided into seven parts. 1. Pain; 2. Musculoskeletal defined in components; 3. Anatomic regions; 4. Musculoskeletal conditions in general and those common among children and adolescents; 5. Children and adolescents and synonyms; 6. Predictive factors and synonyms; and 7. Final search string to be applied in above mentioned electronic databases and also tested in MEDLINE with 5336 hits.

Additional details about the search strategy can be found in the attached PDF document (link provided

## PROSPERO

### International prospective register of systematic reviews

below).

#### 17. URL to search strategy.

Give a link to the search strategy or an example of a search strategy for a specific database if available (including the keywords that will be used in the search strategies).

[https://www.crd.york.ac.uk/PROSPEROFILES/41378\\_STRATEGY\\_20170613.pdf](https://www.crd.york.ac.uk/PROSPEROFILES/41378_STRATEGY_20170613.pdf)

Alternatively, upload your search strategy to CRD in pdf format. Please note that by doing so you are consenting to the file being made publicly accessible.

Yes I give permission for this file to be made publicly available

#### 18. \* Condition or domain being studied.

Give a short description of the disease, condition or healthcare domain being studied. This could include health and wellbeing outcomes.

Children and adolescents aged 0-19 years with musculoskeletal pain.

#### 19. \* Participants/population.

Give summary criteria for the participants or populations being studied by the review. The preferred format includes details of both inclusion and exclusion criteria.

The participants must all have some form of self-reported musculoskeletal pain at recruitment.

Musculoskeletal pain is defined according to the International Association for the Study of Pain, IASP as: "pain arisen from muscle, tendon, bone and joint. Excluded from the definition is pain due to serious local causes, such as tumors, fractures, or infections, and systemic and neurological causes". Types of pain are named according to the region affected, e.g. back pain, neck pain, shoulder pain, elbow pain, buttock pain, hip pain, knee pain, and ankle pain.

Inclusion criteria: 0 to 19 years of age, self-reported musculoskeletal pain.

Exclusion criteria: Older than 19 years of age.

#### 20. \* Intervention(s), exposure(s).

Give full and clear descriptions or definitions of the nature of the interventions or the exposures to be reviewed.

All interventions used to treat musculoskeletal pain in children and adolescents are eligible, including conservative as well as non-conservative interventions. Conservative intervention is defined as: utilization of non-surgical treatment options, such as, but not limited to, the following: physiotherapy, immobilization, bandaging, drug therapy, wait and see and intraarticular, intramuscular and intratendinous injections with NSAID/glucocorticoid/steroid. We will also include studies that do not contain interventions.

#### 21. \* Comparator(s)/control.

Where relevant, give details of the alternatives against which the main subject/topic of the review will be compared (e.g. another intervention or a non-exposed control group). The preferred format includes details of both inclusion and exclusion criteria.

We expect that most studies will not have used a comparator as they are prospective cohort studies. If the study design is a randomized trial, we will include all types of comparators.

#### 22. \* Types of study to be included.

Give details of the types of study (study designs) eligible for inclusion in the review. If there are no restrictions on the types of study design eligible for inclusion, or certain study types are excluded, this should be stated. The preferred format includes details of both inclusion and exclusion criteria.

Prospective cohort studies (including randomized trials) with a population of children and adolescents aged 0-19 years will be included in this systematic review if they report prognostic factors or treatment effect

## PROSPERO

### International prospective register of systematic reviews

modifiers (e.g. baseline variables that are associated with the outcome).

#### 23. Context.

Give summary details of the setting and other relevant characteristics which help define the inclusion or exclusion criteria.

There will be no restrictions on the type of setting.

#### 24. \* Primary outcome(s).

Give the pre-specified primary (most important) outcomes of the review, including details of how the outcome is defined and measured and when these measurement are made, if these are part of the review inclusion criteria.

We will search for all baseline patient characteristics that are: (i) associated with a poor outcome on follow-up regardless of which treatment has been provided (prognosis); or ii) associated with a successful outcome to a specific treatment (treatment effect modifiers). These may include intrinsic variables (such as age, height, weight, pain intensity, pain duration and similar) or extrinsic variables (such as social status, parental education, sports participation and similar).

#### Timing and effect measures

We will include patient characteristics that are associated with both short- and long-term outcomes. These will be divided into three endpoints, i.e. short-term (3 months), medium-term (3-12 months) and long-term (more than 12 months).

#### 25. \* Secondary outcome(s).

List the pre-specified secondary (additional) outcomes of the review, with a similar level of detail to that required for primary outcomes. Where there are no secondary outcomes please state 'None' or 'Not applicable' as appropriate to the review

The proportion of patients that report themselves free of musculoskeletal pain at follow-up in the included studies.

#### Timing and effect measures

We will include patient characteristics that are associated with both short- and long-term outcomes. These will be divided into three endpoints, i.e. short-term (3 months), medium-term (3-12 months) and long-term (more than 12 months).

#### 26. Data extraction (selection and coding).

Give the procedure for selecting studies for the review and extracting data, including the number of researchers involved and how discrepancies will be resolved. List the data to be extracted.

The process of study selection will be conducted by two reviewers (NP and AR). They will independently identify studies from the electronic database search and will screen the titles and/or abstracts that have relevance to the question: what are the prognostic factors for children and adolescents with musculoskeletal pain? Studies kept after the primary assessment will be screened by full text and then selected for a final inclusion.

Any excluded studies will be recorded, along with a reason for the exclusion. There will be no blinding of the review authors to the journal titles, authors or institutions. Reference lists of all included studies will be screened for additional eligible publications that may have been missed during the initial search.

Any disagreements inside the reviewer group will lead to the involvement of a third reviewer (MSR).

NP will extract data using a pre-defined data extraction form (see Appendix 1 in the full protocol), inspired by The Cochrane Collaboration, Data collection form for intervention reviews: RCTs and non-RCTs (3). All the extracted data will then be validated by a second person (MSR). The collected data will include a description of the participants, setting (e.g. general practice or population-based cohort) and results (including all patient characteristics tested for association with outcome).

## PROSPERO

### International prospective register of systematic reviews

We will contact the corresponding author with a request for information, if any data concerning the intervention or outcome is missing from an included study, the intention being to increase the thoroughness of the descriptions of interventions and outcomes in this study.

Studies examining children and adolescents with musculoskeletal pain aged 0 to 19 years will be included in this review. If a study reports on an age range that exceeds this, we will contact the corresponding author and ask for data on the 0-19 year olds. The requested data will be included if it can be retrieved within one month of the inquiry.

#### 27. \* Risk of bias (quality) assessment.

State whether and how risk of bias will be assessed (including the number of researchers involved and how discrepancies will be resolved), how the quality of individual studies will be assessed, and whether and how this will influence the planned synthesis.

The QUIPS risk of bias tool for prognostic studies will be used to assess the quality of each paper (4). This tool contains items and considerations for six bias domains i.e. study participation, study attrition, prognostic factor measurement, outcome measurement, study confounding, statistical analysis and reporting (see Appendix 2 in full protocol). Each of the six potential bias domains will be rated by NP as high, moderate, or low risk of bias. When assessing the overall risk of bias in each study, a study will be described with a low risk of bias when either a) most of or b) the most important (determined a priori) or c) all of the six bias domains are rated with a low risk of bias. The same applies to moderate and high risk of bias.

#### 28. \* Strategy for data synthesis.

Give the planned general approach to synthesis, e.g. whether aggregate or individual participant data will be used and whether a quantitative or narrative (descriptive) synthesis is planned. It is acceptable to state that a quantitative synthesis will be used if the included studies are sufficiently homogenous.

A narrative synthesis is planned, the reason being the expected substantial heterogeneity in our results. If the prognostic factors or treatment effect modifiers are adequately homogenous, we will conduct a meta-analysis and pool the individual variables.

#### 29. \* Analysis of subgroups or subsets.

Give details of any plans for the separate presentation, exploration or analysis of different types of participants (e.g. by age, disease status, ethnicity, socioeconomic status, presence or absence or co-morbidities); different types of intervention (e.g. drug dose, presence or absence of particular components of intervention); different settings (e.g. country, acute or primary care sector, professional or family care); or different types of study (e.g. randomised or non-randomised).

Data will be divided into two main separate groups: prognostic factors and treatment effect modifiers and then sub-grouped into regions of musculoskeletal pain, gender and age.

#### 30. \* Type and method of review.

Select the type of review and the review method from the lists below. Select the health area(s) of interest for your review.

##### Type of review

Cost effectiveness

No

Diagnostic

No

Epidemiologic

No

Individual patient data (IPD) meta-analysis

No

Intervention

## PROSPERO

### International prospective register of systematic reviews

1  
2  
3  
4 No

5 Meta-analysis

6 No

7 Methodology

8 No

9 Network meta-analysis

10 No

11 Pre-clinical

12 No

13 Prevention

14 No

15 Prognostic

16 Yes

17 Prospective meta-analysis (PMA)

18 No

19 Qualitative synthesis

20 No

21 Review of reviews

22 No

23 Service delivery

24 No

25 Systematic review

26 Yes

27 Other

28 No

### Health area of the review

29 Alcohol/substance misuse/abuse

30 No

31 Blood and immune system

32 No

33 Cancer

34 No

35 Cardiovascular

36 No

37 Care of the elderly

38 No

39 Child health

40 No

41 Complementary therapies

42 No

43 Crime and justice

44 No

45 Dental

46 No

47 Digestive system

48 No

49 Ear, nose and throat

50 No

51 Education

**PROSPERO****International prospective register of systematic reviews**

1  
2  
3  
4 No  
5 Endocrine and metabolic disorders  
6 No  
7 Eye disorders  
8 No  
9 General interest  
10 No  
11 Genetics  
12 No  
13 Health inequalities/health equity  
14 No  
15 Infections and infestations  
16 No  
17 International development  
18 No  
19 Mental health and behavioural conditions  
20 No  
21 Musculoskeletal  
22 No  
23 Neurological  
24 No  
25 Nursing  
26 No  
27 Obstetrics and gynaecology  
28 No  
29 Oral health  
30 No  
31 Palliative care  
32 No  
33 Perioperative care  
34 No  
35 Physiotherapy  
36 No  
37 Pregnancy and childbirth  
38 No  
39 Public health (including social determinants of health)  
40 No  
41 Rehabilitation  
42 No  
43 Respiratory disorders  
44 No  
45 Service delivery  
46 No  
47 Skin disorders  
48 No  
49 Social care  
50 No  
51 Surgery  
52 No  
53 Tropical Medicine  
54 No  
55  
56  
57  
58  
59  
60

## PROSPERO

### International prospective register of systematic reviews

Urological

No

Wounds, injuries and accidents

No

Violence and abuse

No

### 31. Language.

Select each language individually to add it to the list below, use the bin icon to remove any added in error.

English

There is an English language summary.

### 32. Country.

Select the country in which the review is being carried out from the drop down list. For multi-national collaborations select all the countries involved.

Denmark

### 33. Other registration details.

Give the name of any organisation where the systematic review title or protocol is registered (such as with The Campbell Collaboration, or The Joanna Briggs Institute) together with any unique identification number assigned. (N.B. Registration details for Cochrane protocols will be automatically entered). If extracted data will be stored and made available through a repository such as the Systematic Review Data Repository (SRDR), details and a link should be included here. If none, leave blank.

### 34. Reference and/or URL for published protocol.

Give the citation and link for the published protocol, if there is one

Give the link to the published protocol.

[http://www.crd.york.ac.uk/PROSPEROFILES/41378\\_PROTOCOL\\_20160520.pdf](http://www.crd.york.ac.uk/PROSPEROFILES/41378_PROTOCOL_20160520.pdf)

Alternatively, upload your published protocol to CRD in pdf format. Please note that by doing so you are consenting to the file being made publicly accessible.

Yes I give permission for this file to be made publicly available

Please note that the information required in the PROSPERO registration form must be completed in full even if access to a protocol is given.

### 35. Dissemination plans.

Give brief details of plans for communicating essential messages from the review to the appropriate audiences.

The manuscript will be submitted for publication in an appropriate peer-reviewed journal. In addition to this we will produce material to be distributed to general practitioners and other health care providers, who manage children and adolescents with musculoskeletal pain. This will be done in the form of a short animation video, visualizing the main study results from the systematic review. The animation will be distributed through social media, websites and patient associations. This will ensure dissemination of our results to our target audience.

### Do you intend to publish the review on completion?

Yes

## PROSPERO

### International prospective register of systematic reviews

#### 36. Keywords.

Give words or phrases that best describe the review. Separate keywords with a semicolon or new line. Keywords will help users find the review in the Register (the words do not appear in the public record but are included in searches). Be as specific and precise as possible. Avoid acronyms and abbreviations unless these are in wide use.

systematic review  
children  
adolescence  
musculoskeletal pain  
prognosis  
treatment effect modifier

#### 37. Details of any existing review of the same topic by the same authors.

Give details of earlier versions of the systematic review if an update of an existing review is being registered, including full bibliographic reference if possible.

#### 38. \* Current review status.

Review status should be updated when the review is completed and when it is published. Please provide anticipated publication date

Review\_Ongoing

#### 39. Any additional information.

Provide any other information the review team feel is relevant to the registration of the review.

References:

1. [http://www.iasp-pain.org/files/Content/ContentFolders/GlobalYearAgainstPain2/MusculoskeletalPainFactSheets/AcutePain\\_Final.pdf](http://www.iasp-pain.org/files/Content/ContentFolders/GlobalYearAgainstPain2/MusculoskeletalPainFactSheets/AcutePain_Final.pdf)
2. <http://www.spine-health.com/glossary/conservative-treatment>.
3. Cochrane Training, Data collection form for intervention reviews: RCTs and non-RCTs. <http://training.cochrane.org/resource/data-collection-forms-intervention-reviews> 2014.
4. Hayden JA, van der Windt DA, Cartwright JL, Côté P, Bombardier C. Assessing bias in studies of prognostic factors. *Ann Intern Med.* 2013;158(4):280-6.

#### 40. Details of final report/publication(s).

This field should be left empty until details of the completed review are available.

Give the link to the published review.



| Supplementary table 1. Estimates on prognostic factors specified according to musculoskeletal pain type, baseline age, and follow-up in the included studies |                                                                           | Musculoskeletal pain      | Neck pain           |                     |           |                                       |  |
|--------------------------------------------------------------------------------------------------------------------------------------------------------------|---------------------------------------------------------------------------|---------------------------|---------------------|---------------------|-----------|---------------------------------------|--|
|                                                                                                                                                              |                                                                           | Low back pain             | Low limb pain       | Headache            |           |                                       |  |
|                                                                                                                                                              |                                                                           | Knee pain                 | Back pain           | Growing pain        |           |                                       |  |
| Prognostic factors subgrouped according to the biopsychosocial model                                                                                         |                                                                           | Study ID (Follow-up, yrs) | RR (95% CI)         | OR (95% CI)         | p-value   | Adjusted for                          |  |
| <b>BIOLOGICAL PROGNOSTIC FACTORS</b>                                                                                                                         |                                                                           |                           |                     |                     |           |                                       |  |
| <b>Female sex compared to male</b>                                                                                                                           |                                                                           |                           |                     |                     |           |                                       |  |
| 8 to 13                                                                                                                                                      |                                                                           | 37 (3)                    |                     |                     | 0.038     |                                       |  |
| 10 to 16                                                                                                                                                     |                                                                           | 20 (11)                   |                     | M 1.8 (1.1-2.9)     |           |                                       |  |
| 9 to 12                                                                                                                                                      |                                                                           | 21 (4)                    | U 1.24 (1.07-1.44)  |                     |           | age                                   |  |
| 9 to 12                                                                                                                                                      |                                                                           | 28 (1)                    |                     | 1.78 (1.18-2.69)    | 0.006     |                                       |  |
| 10 to 17                                                                                                                                                     |                                                                           | 50 (3mo)                  |                     |                     | 0.003     |                                       |  |
| 9 to 12                                                                                                                                                      |                                                                           | 27 (1)                    |                     |                     | 0.001     |                                       |  |
| 12 to 15                                                                                                                                                     |                                                                           | 34 (2)                    | CR 1.29 (1.02-1.63) |                     | 0.08      |                                       |  |
| 12 to 15                                                                                                                                                     |                                                                           | 9 (1)                     |                     | 3.66 (1.09-12.33)   | 0.04      |                                       |  |
| 10 to 11                                                                                                                                                     |                                                                           | 39 (2)                    |                     |                     | M < 0.001 |                                       |  |
| 10 to 11                                                                                                                                                     |                                                                           | 39 (2)                    |                     |                     | M < 0.001 |                                       |  |
| 8, 11, 14                                                                                                                                                    |                                                                           | 20 (11)                   |                     | 2.24 (1.24-4.20)    |           |                                       |  |
| <b>Older age</b>                                                                                                                                             |                                                                           |                           |                     |                     |           |                                       |  |
| 9 to 12                                                                                                                                                      | Older age                                                                 | 28 (1)                    |                     | 1.24 (1.02-1.50)    | 0.031     |                                       |  |
| 9 to 12 F                                                                                                                                                    | 11 to 13 years vs. 9-10 years                                             | 21 (4)                    | M 1.40 (1.17-1.67)  |                     |           |                                       |  |
| 12 to 15                                                                                                                                                     | Older age, increase per year, 12 years as referent                        | 9 (1)                     |                     | M 1.45 (1.07-1.95)  | 0.01      |                                       |  |
| 13                                                                                                                                                           | Older age                                                                 | 25 (3)                    |                     |                     | 0.04      |                                       |  |
| <b>Body measurement factors</b>                                                                                                                              |                                                                           |                           |                     |                     |           |                                       |  |
| 8 to 13                                                                                                                                                      | Higher pubertal group (a) group 2 and 3 vs. group 1                       | 37 (3)                    |                     |                     | 0.022     |                                       |  |
| 9 to 12 F                                                                                                                                                    | Beighton score 6-9 vs. score < 6                                          | 21 (4)                    | M 1.31 (1.18-1.46)  |                     |           | age                                   |  |
| 11 to 14                                                                                                                                                     | Height < 158cm                                                            | 23 (4)                    | 2.2 (1.2-3.8)       |                     |           | age, sex                              |  |
| 9 to 12                                                                                                                                                      | Hypomobility score ≥/=>6 vs. <6                                           | 11 (4)                    |                     | M 2.93 (1.13-7.70)  |           |                                       |  |
| <b>Physical functioning</b>                                                                                                                                  |                                                                           |                           |                     |                     |           |                                       |  |
| 14 to 16                                                                                                                                                     | Ratio flexion mobility (cm)/extension strength (min) (b)                  | 36 (3)                    |                     | 1.9 (1.1-3.2)       | 0.02      | gender, well being, physical activity |  |
| 14 to 16                                                                                                                                                     | Ratio extension mobility cm/extension strength (min) (b)                  | 36 (3)                    |                     | 3.2 (1.3-8.3)       | 0.02      | gender                                |  |
| 14 to 16                                                                                                                                                     | Ratio flexion + extension mobility (cm)/extension strength (min) (b)      | 36 (3)                    |                     | 1.5 (1.1-2.2)       | 0.02      | gender, well being, physical activity |  |
| <b>Pain characteristics</b>                                                                                                                                  |                                                                           |                           |                     |                     |           |                                       |  |
| 2 to 17                                                                                                                                                      | Higher number of painful sites (mean 3.7 vs. 2.8) range 0-6               | 22 (9)                    |                     |                     | 0.04      |                                       |  |
| 2 to 17                                                                                                                                                      | More frequent generalised vs. localised pain (86 vs. 47%)                 | 22 (9)                    |                     | 84.0 (2.1-3000)     | 0.02      |                                       |  |
| 2 to 17                                                                                                                                                      | More intense pain (median 4.3 vs. 0.5cm) range 0-10cm VAS                 | 22 (9)                    |                     |                     | 0.03      |                                       |  |
| 2 to 17                                                                                                                                                      | Longer disease duration before first admission (median 1.4 vs. 0.5 years) | 22 (9)                    |                     |                     | <0.01     |                                       |  |
| 9 to 12                                                                                                                                                      | Pain at both baseline and 1 year follow-up vs. only baseline              | 21 (4)                    |                     | 2.9 (1.9-4.4)       |           | age                                   |  |
| 9 to 12 M                                                                                                                                                    | Multisite vs. localised pain                                              | 21 (4)                    | U 1.32 (1.04-1.66)  |                     |           | age                                   |  |
| 9 to 12 M                                                                                                                                                    | Headache (psychosomatic symptom (c))                                      | 21 (4)                    | M 1.43 (1.12-1.83)  |                     |           | age                                   |  |
| 10 to 17                                                                                                                                                     | Conditioned pain modulation CPM (d)                                       | 50(3mo)                   |                     |                     | 0.046     |                                       |  |
| 9 to 12 F                                                                                                                                                    | Abdominal pain (psychosomatic symptom (c))                                | 21 (4)                    | U 1.20 (1.03-1.40)  |                     |           | age                                   |  |
| 11 to 14                                                                                                                                                     | Radiating leg pain vs. no radiating pain                                  | 23 (4)                    | 2.2 (1.4-3.6)       |                     |           | age, sex                              |  |
| 11 to 14                                                                                                                                                     | Low back pain start > 12 month prior to admission                         | 23 (4)                    | 2.4 (1.3-4.4)       |                     |           | age, sex                              |  |
| 11 to 14                                                                                                                                                     | Pain episode > 7 days vs < 24h                                            | 23 (4)                    | 2.6 (1.4-4.9)       |                     |           | age, sex                              |  |
| 15 to 19                                                                                                                                                     | Patellofemoral pain diagnosis vs. other types of knee pain                | 34 (2)                    | 1.24 (1.04-1.49)    |                     | 0.01      | age, sex, BMI                         |  |
| 15 to 19                                                                                                                                                     | High pressure pain threshold (PPT) around the knee                        | 35 (3mo)                  |                     |                     | 0.03      |                                       |  |
| 12 to 15                                                                                                                                                     | Daily vs. rare pain                                                       | 9 (1)                     |                     | M 6.31 (1.21-33.01) | 0.03      |                                       |  |
| 12 to 15                                                                                                                                                     | Pain several times/week vs. monthly                                       | 34 (2)                    | CR 1.58 (1.15-2.17) |                     | 0.005     |                                       |  |
| 16 to 18                                                                                                                                                     | Daily pain frequency vs. monthly                                          | 34 (2)                    | 1.58 (1.17-2.14)    |                     | 0.003     |                                       |  |

|    |            |                                                                                |         |                     |                  |          |          |  |
|----|------------|--------------------------------------------------------------------------------|---------|---------------------|------------------|----------|----------|--|
| 1  |            |                                                                                |         |                     |                  |          |          |  |
| 2  | 16 to 18   | Longer pain duration per 10-months increase                                    | 34 (2)  | CR 1.04 (1.01-1.07) |                  | 0.01     |          |  |
| 3  | 9 to 12 M  | Also headache (e) at least once a week                                         | 38 (4)  |                     |                  | <0.001   |          |  |
| 4  | 9 to 12 M  | Also abdominal pain (e) at least a week                                        | 38 (4)  |                     |                  | <0.001   |          |  |
| 5  | 9 to 12 F  | Also headache (e) at least once a week                                         | 38 (4)  |                     |                  | <0.001   |          |  |
| 6  | 9 to 12 F  | Also abdominal pain (e) at least a week                                        | 38 (4)  |                     |                  | <0.001   |          |  |
| 7  | 9 to 12    | Other musculoskeletal symptoms: upper extremities at least once a week         | 38 (4)  |                     |                  | <0.001   |          |  |
| 8  | 9 to 12 M  | Other musculoskeletal symptoms: chest at least once a week                     | 38 (4)  |                     |                  | 0.008    |          |  |
| 9  | 9 to 12 F  | Other musculoskeletal symptoms: chest at least once a week                     | 38 (4)  |                     |                  | 0.001    |          |  |
| 10 | 9 to 12    | Other musculoskeletal symptoms: back at least once a week                      | 38 (4)  |                     |                  | <0.001   |          |  |
| 11 | 9 to 12 M  | Other musculoskeletal symptoms as well: lower extremities at least once a week | 38 (4)  |                     |                  | <0.001   |          |  |
| 12 | 9 to 12 F  | Other musculoskeletal symptoms as well: lower extremities at least once a week | 38 (4)  |                     |                  | 0.003    |          |  |
| 13 | 8, 11, 14  | Headache >= 1time/week                                                         | 20 (11) |                     | 2.3 (1.1-4.5)    |          |          |  |
| 14 | 10 to 16   | Duration of pain episodes > 3 hours vs. < 3 hours                              | 20 (11) |                     | U 3.1 (1.1-8.2)  |          |          |  |
| 15 | 10 to 16   | Lower pain threshold                                                           | 40 (5)  |                     |                  | <0.05    |          |  |
| 16 | 10 to 16   | Lower pain threshold at anterior tibial region (pressure level < 5ke/cm2)      | 40 (5)  |                     |                  | <0.01    |          |  |
| 17 |            | <b>PSYCHOLOGICAL PROGNOSTIC FACTORS</b>                                        |         |                     |                  |          |          |  |
| 18 |            | <b>General psychological factors</b>                                           |         |                     |                  |          |          |  |
| 19 | 16 M       | Internalization (f)                                                            | 33 (2)  |                     | 2.32 (1.23-4.37) |          |          |  |
| 20 | 16 M       | Externalization (f)                                                            | 33 (2)  |                     | 2.17 (1.24-3.81) |          |          |  |
| 21 | 16 F       | Internalization (f)                                                            | 33 (2)  |                     | 3.70 (1.88-7.27) |          |          |  |
| 22 | 10 to 16   | Often/sometimes nervous                                                        | 20 (11) |                     | M 2.1 (1.3-3.4)  |          |          |  |
| 23 | 16 to 18 M | Internalization (f)                                                            | 24 (2)  |                     |                  | < 0.001  |          |  |
| 24 | 16 to 18 M | Externalization (f)                                                            | 24 (2)  |                     |                  | < 0.001  |          |  |
| 25 | 16 to 18 F | Higher internalization score (f)                                               | 24 (2)  |                     |                  | < 0.001  |          |  |
| 26 | 16 to 18 F | Higher externalization score (f)                                               | 24 (2)  |                     |                  | < 0.001  |          |  |
| 27 | 10 to 16   | Self-perception of not feeling completely healthy                              | 20 (11) |                     | U 1.7 (1.1-2.8)  |          |          |  |
| 28 | 10 to 16   | Unsatisfied with own appearance                                                | 20 (11) |                     | U 1.6 (1.1-2.5)  |          |          |  |
| 29 | 12 to 15   | EQ-5D index score 0-25 vs. 75-100% quartiles (g)                               | 9 (1)   |                     | U 0.08           | <0.001   |          |  |
| 30 | 12 to 15   | EQ-5D index score 0-25 vs. 25-50% quartiles (g)                                | 9 (1)   |                     | U 0.29           | <0.001   |          |  |
| 31 | 12 to 15   | EQ-5D index score 25-50th % vs. 75th-100th % (g)                               | 34 (2)  | CR 1.81 (1.14-2.85) |                  | 0.01     |          |  |
| 32 | 12 to 15   | EQ-5D index score 0-25th % vs. 75th-100th % (g)                                | 34 (2)  | CR 2.00 (1.28-3.12) |                  | 0.002    |          |  |
| 33 | 10 to 11   | Self reported low self esteem                                                  | 39 (2)  |                     |                  | U < 0.01 |          |  |
| 34 | 10 to 11   | Parent reported adolescent low self esteem                                     | 39 (2)  |                     |                  | U < 0.01 |          |  |
| 35 |            | <b>Depressive factors</b>                                                      |         |                     |                  |          |          |  |
| 36 | 9 to 12 F  | Depressive feelings                                                            | 21 (4)  | U 1.21 (1.03-1.42)  |                  |          | age      |  |
| 37 | 9 to 12 F  | Depressive symptoms in a frequency of at least once a week                     | 38 (4)  |                     |                  | <0.001   |          |  |
| 38 | 9 to 12 M  | Depressive symptoms in a frequency of at least once a week                     | 38 (4)  |                     |                  | <0.001   |          |  |
| 39 | 12 to 16   | Higher score of anxiety and depressive symptoms (h)                            | 18 (4)  |                     | 1.4 (1.03-1.90)  | 0.032    |          |  |
| 40 | 10 to 11   | Self reported anxiety/depression                                               | 39 (2)  |                     |                  | M <0.01  |          |  |
| 41 | 10 to 11   | Parent reported adolescent anxiety/depression                                  | 39 (2)  |                     |                  | < 0.05   |          |  |
| 42 |            | <b>SOCIAL PROGNOSTIC FACTORS</b>                                               |         |                     |                  |          |          |  |
| 43 |            | <b>General social factors</b>                                                  |         |                     |                  |          |          |  |
| 44 | 2 to 17    | Lower paternal educational level (median 10 vs. 14 years education)            | 22 (9)  |                     |                  | p<0.01   |          |  |
| 45 | 2 to 17    | Lower maternal educational level (median 10 vs. 14 years education)            | 22 (9)  |                     |                  | p<0.01   |          |  |
| 46 | 2 to 17    | More chronic family difficulties (mean 4.3 vs. 2.9) (i)                        | 22 (9)  |                     |                  | p<0.01   |          |  |
| 47 | 10 to 16   | Doing well in school                                                           | 20 (11) |                     | U 1.8 (1.1-2.9)  |          |          |  |
| 48 | 9 to 12    | Higher disability index (j) 1-2 vs 0                                           | 28 (1)  | 1.72 (1.09-2.73)    |                  | 0.005    |          |  |
| 49 | 9 to 12    | Higher disability index (j) 3-5 vs 0                                           | 28 (1)  | 3.17 (1.54-6.55)    |                  | 0.005    |          |  |
| 50 | 9 to 12    | Higher disability index (j) 3-5 vs. 0                                          | 21 (4)  | U 1.23 (1.02-1.49)  |                  |          | age      |  |
| 51 | 11 to 14   | High vs. low peer relationship problems                                        | 23 (4)  | 2.4 (1.3-4.2)       |                  |          | age, sex |  |
| 52 | 11 to 14   | Difficulty standing in line for 10 minutes                                     | 23 (4)  | 2.7 (1.5-4.9)       |                  |          |          |  |
| 53 | 11 to 14   | Difficulties carrying a schoolbag                                              | 23 (4)  | 2.1 (1.1-4.0)       |                  |          |          |  |
| 54 | 11 to 14   | High limitation level HFAQ (k) 4-9 vs. 0-1 limitations                         | 23 (4)  | 4.1 (1.05-16.2)     |                  |          |          |  |

|    |            |                                                                                                                                                                                                                                                                                                                                                                                                                                                                                                                                                                                                   |         |                    |                    |        |                                                       |
|----|------------|---------------------------------------------------------------------------------------------------------------------------------------------------------------------------------------------------------------------------------------------------------------------------------------------------------------------------------------------------------------------------------------------------------------------------------------------------------------------------------------------------------------------------------------------------------------------------------------------------|---------|--------------------|--------------------|--------|-------------------------------------------------------|
| 1  | 8, 11, 14  | Headache on non-school days                                                                                                                                                                                                                                                                                                                                                                                                                                                                                                                                                                       | 20 (11) |                    | 3.1 (1.3-7.3)      |        |                                                       |
| 2  | 13 M       | Use of physiotherapy for headache or neck pain during the past 6 months                                                                                                                                                                                                                                                                                                                                                                                                                                                                                                                           | 25 (3)  |                    |                    | 0.004  |                                                       |
| 3  | 10 to 11 F | Parental recurrent headache                                                                                                                                                                                                                                                                                                                                                                                                                                                                                                                                                                       | 39 (2)  |                    |                    | p<0.05 |                                                       |
| 4  | 10 to 16   | At least one parent with a pain syndrome                                                                                                                                                                                                                                                                                                                                                                                                                                                                                                                                                          | 40 (5)  |                    |                    | 0.047  |                                                       |
| 5  |            | <b>Factors related to sleep/daytime tiredness</b>                                                                                                                                                                                                                                                                                                                                                                                                                                                                                                                                                 |         |                    |                    |        |                                                       |
| 6  | 9 to 12 F  | Waking up during nights                                                                                                                                                                                                                                                                                                                                                                                                                                                                                                                                                                           | 21 (4)  | U 1.18 (1.01-1.37) |                    |        | age                                                   |
| 7  | 16 F       | Sleep <= 7h vs. 8-9 h/day                                                                                                                                                                                                                                                                                                                                                                                                                                                                                                                                                                         | 33 (2)  |                    | 1.68 (1.05-2.68)   |        |                                                       |
| 8  | 9 to 12    | Day tiredness, fatigue                                                                                                                                                                                                                                                                                                                                                                                                                                                                                                                                                                            | 28 (1)  |                    | 1.86 (1.16-3.00)   | 0.010  |                                                       |
| 9  | 16 to 18 M | Insufficient sleeping time h/day (mean 8 vs. 8.5 h/day)                                                                                                                                                                                                                                                                                                                                                                                                                                                                                                                                           | 24 (2)  |                    |                    | 0.001  |                                                       |
| 10 | 9 to 12 M  | Difficulties falling asleep                                                                                                                                                                                                                                                                                                                                                                                                                                                                                                                                                                       | 38 (4)  |                    |                    | <0.001 |                                                       |
| 11 | 9 to 12 M  | Daytime tiredness                                                                                                                                                                                                                                                                                                                                                                                                                                                                                                                                                                                 | 38 (4)  |                    |                    | <0.001 |                                                       |
| 12 | 9 to 12 M  | Walking up during nights                                                                                                                                                                                                                                                                                                                                                                                                                                                                                                                                                                          | 38 (4)  |                    |                    | 0.001  |                                                       |
| 13 | 9 to 12 F  | Difficulties falling asleep                                                                                                                                                                                                                                                                                                                                                                                                                                                                                                                                                                       | 38 (4)  |                    |                    | <0.001 |                                                       |
| 14 | 9 to 12 F  | Daytime tiredness                                                                                                                                                                                                                                                                                                                                                                                                                                                                                                                                                                                 | 38 (4)  |                    |                    | <0.001 |                                                       |
| 15 | 9 to 12 F  | Walking up during nights                                                                                                                                                                                                                                                                                                                                                                                                                                                                                                                                                                          | 38 (4)  |                    |                    | <0.001 |                                                       |
| 16 |            | <b>Physical activity / inactivity</b>                                                                                                                                                                                                                                                                                                                                                                                                                                                                                                                                                             |         |                    |                    |        |                                                       |
| 17 | 16 F       | >/=4 vs. 2-3 hours of moderate-to-vigorous physical activity/week                                                                                                                                                                                                                                                                                                                                                                                                                                                                                                                                 | 33 (2)  |                    | 1.63 (1.04-2.56)   |        |                                                       |
| 18 | 16 to 18 M | Longer sitting time outside school hours (mean 6.2 h/day)                                                                                                                                                                                                                                                                                                                                                                                                                                                                                                                                         | 24 (2)  |                    |                    | 0.004  |                                                       |
| 19 | 12 to 15   | Sports participation 3-7 t/wk vs. 0-2 t/wk                                                                                                                                                                                                                                                                                                                                                                                                                                                                                                                                                        | 9 (1)   |                    | M 2.01 (1.20-3.36) | 0.008  |                                                       |
| 20 | 9 to 12    | Exercise frequency 5-7 t vs. 0-2/week                                                                                                                                                                                                                                                                                                                                                                                                                                                                                                                                                             | 11 (1)  |                    | M 2.43 (1.16-5.05) |        |                                                       |
| 21 |            | <b>Alcohol</b>                                                                                                                                                                                                                                                                                                                                                                                                                                                                                                                                                                                    |         |                    |                    |        |                                                       |
| 22 | 16 to 18 F | More than occasional consumption                                                                                                                                                                                                                                                                                                                                                                                                                                                                                                                                                                  | 24 (2)  |                    |                    | 0.038  |                                                       |
| 23 |            | <b>Smoking</b>                                                                                                                                                                                                                                                                                                                                                                                                                                                                                                                                                                                    |         |                    |                    |        |                                                       |
| 24 | 16 F       | Smoking vs. nonsmoking                                                                                                                                                                                                                                                                                                                                                                                                                                                                                                                                                                            | 33 (2)  |                    | 1.89 (1.23-2.90)   |        |                                                       |
| 25 | 16 F       | Smoking 5-7 days/week vs. nonsmoking                                                                                                                                                                                                                                                                                                                                                                                                                                                                                                                                                              | 30 (2)  |                    | 2.52 (1.40-4.53)   |        | family's SES, physical activity, BMI, depressive mood |
| 26 | 16 F       | Smoking 1-9 cigarettes/day vs. nonsmoking                                                                                                                                                                                                                                                                                                                                                                                                                                                                                                                                                         | 30 (2)  |                    | 2.39 (1.40-4.08)   |        | family's SES, physical activity, BMI, depressive mood |
| 27 | 16 F       | Smoking > 9 cigarettes/day vs. nonsmoking                                                                                                                                                                                                                                                                                                                                                                                                                                                                                                                                                         | 30 (2)  |                    | 2.57 (1.03-6.46)   |        | family's SES, physical activity, BMI, depressive mood |
| 28 | 16 M       | Smoking 1-9 cigarettes/day vs. nonsmoking                                                                                                                                                                                                                                                                                                                                                                                                                                                                                                                                                         | 30 (2)  |                    | 2.68 (1.35-5.32)   |        | family's SES, physical activity, BMI, depressive mood |
| 29 |            | <b>Explanatory notes</b>                                                                                                                                                                                                                                                                                                                                                                                                                                                                                                                                                                          |         |                    |                    |        |                                                       |
| 30 |            | F = prognostic factor only applicable for female participants, M = Male, when unspecified = unisex                                                                                                                                                                                                                                                                                                                                                                                                                                                                                                |         |                    |                    |        |                                                       |
| 31 |            | RR > 1 or < 1, OR > 1 or < 1, p < 0.05 indicate that the prognostic factor is associated with a higher risk of persistent MSK pain.                                                                                                                                                                                                                                                                                                                                                                                                                                                               |         |                    |                    |        |                                                       |
| 32 |            | CI = confidence interval M = Multivariate analysis U = Univariate analysis CR = Crude                                                                                                                                                                                                                                                                                                                                                                                                                                                                                                             |         |                    |                    |        |                                                       |
| 33 |            | a = Group 1: prepubertal, group 2: became pubertal during 3 years follow-up, and group 3: pubertal at baseline. The pubertal stage was assessed by the presence of secondary signs of pubertal development. For females, puberty was defined by the stage of breast development (Tanner stage >= 3) and menarche. For males, puberty was defined in presence of a testicles volume >= 12 ml and presence of pubic and underarm hair.                                                                                                                                                              |         |                    |                    |        |                                                       |
| 34 |            | b = Low lumbar extension strength and high ratios between lumbar mobility and lumbar extension strength predicts future low back pain                                                                                                                                                                                                                                                                                                                                                                                                                                                             |         |                    |                    |        |                                                       |
| 35 |            | c = childhood abdominal pain, headache, depressive symptoms, day tiredness, difficulties in falling asleep, waking up during nights are believed to be having a psychosomatic origin in the great majority of cases.                                                                                                                                                                                                                                                                                                                                                                              |         |                    |                    |        |                                                       |
| 36 |            | d = Conditioned pain modulation CPM calculated using a ratio of conditioned heat pain threshold with a conditioned stimulus (cold pressor) (50).                                                                                                                                                                                                                                                                                                                                                                                                                                                  |         |                    |                    |        |                                                       |
| 37 |            | e = Classified as: other physical and psychological symptoms, without further definition                                                                                                                                                                                                                                                                                                                                                                                                                                                                                                          |         |                    |                    |        |                                                       |
| 38 |            | f = Internalizing score calculated from subscales: anxious/depressed, withdrawn/depressed symptoms, and somatic complaints. Externalizing from rule-breaking and aggressive behaviour.                                                                                                                                                                                                                                                                                                                                                                                                            |         |                    |                    |        |                                                       |
| 39 |            | g = EQ-5D assesses self-reported health status in 5 dimensions: mobility, self-care, usual activities, pain/discomfort, anxiety/depression and within 3 levels of severity: no problems, moderate or severe problems as well as scoring own current self-rated health status on VAS 0-100.                                                                                                                                                                                                                                                                                                        |         |                    |                    |        |                                                       |
| 40 |            | h = Anxiety symptoms: been constantly scared and uneasy, felt tense and restless, worried too much about different matters. Depressive symptoms: felt hopeless when thinking of the future, felt down or sad.                                                                                                                                                                                                                                                                                                                                                                                     |         |                    |                    |        |                                                       |
| 41 |            | i = Assessment of information about employment and education, economic matters, housing, marital or family discord, social networks and the physical and mental health of the family members. Score range 0-6, 6 = severe family difficulties.                                                                                                                                                                                                                                                                                                                                                    |         |                    |                    |        |                                                       |
| 42 |            | j = Subjective disability index calculated from answers to the following proposals: difficulty in falling asleep because of pain, difficulty sitting during a lesson, pain disturbs a walk more than 1km, pain disturbs physical exercise, pain disturbs hobbies. Range 0-5.                                                                                                                                                                                                                                                                                                                      |         |                    |                    |        |                                                       |
| 43 |            | k = The modified Hannover functional ability Questionnaire HFAQ assesses whether pain and ache in low back make any of the following daily activities difficult: reaching up to get a book from a high shelf, carrying your school bag to school, sitting on a school chair for a 45-min lesson, standing in a queue for 10 min, sitting up in bed from a lying position, bending down to put your socks on, standing up from an armchair at home, running fast to catch a bus, and sports activities at school. Low = 0-1 limitation, moderate = 2-3 limitations or high = 4-9 limitations (23). |         |                    |                    |        |                                                       |
| 44 |            | l = Yunus criteria: pain modulation by physical activity, by weather, by anxiety and stress, poor sleep, headache, irritable bowel, soft tissue swelling in hands and feet, fatigue, numbness in hands and feet, feeling excited and nervous. Yes to minimum 3 symptoms to meet the Yunus criteria.                                                                                                                                                                                                                                                                                               |         |                    |                    |        |                                                       |
| 45 |            | m = SES: Socioeconomic status                                                                                                                                                                                                                                                                                                                                                                                                                                                                                                                                                                     |         |                    |                    |        |                                                       |
| 46 |            | n = CDI: Children's depression Inventory. Cut off point >= 13 indicating depressive symptoms                                                                                                                                                                                                                                                                                                                                                                                                                                                                                                      |         |                    |                    |        |                                                       |
| 47 |            | <b>Identified baseline factors without association to persistent musculoskeletal pain, divided in pain type (study ID)</b>                                                                                                                                                                                                                                                                                                                                                                                                                                                                        |         |                    |                    |        |                                                       |
| 48 |            | <b>Musculoskeletal</b> Female: sitting h/day, sleep h/day, Male: physical activity MET-h/week and above occasional alcohol consumption, unisex: smoking pack years, body mass index (BMI) (24)                                                                                                                                                                                                                                                                                                                                                                                                    |         |                    |                    |        |                                                       |
| 49 |            | Exercise frequency >3 vs. <3 t/week, disability index 1-5 vs. 0 (i), waking up during nights (Male), day tiredness, difficulty falling asleep, depressive feelings (Male), headache (Female), absence one day or more from school vs. never being absent due to pain, maximum volume O2 intake (per unit increase) measured during a shuttle run test (21)                                                                                                                                                                                                                                        |         |                    |                    |        |                                                       |

|    |              |                                                                                                                                                                                                                                                                                                                                                                                                                                                                                                                                                                                                                                               |  |  |  |  |  |  |
|----|--------------|-----------------------------------------------------------------------------------------------------------------------------------------------------------------------------------------------------------------------------------------------------------------------------------------------------------------------------------------------------------------------------------------------------------------------------------------------------------------------------------------------------------------------------------------------------------------------------------------------------------------------------------------------|--|--|--|--|--|--|
| 1  |              | Headache, stomachache, depressive feelings, difficulty falling asleep, waking up during nights, Yunus criteria (l), increasing exercise amount, and hypermobility (28)                                                                                                                                                                                                                                                                                                                                                                                                                                                                        |  |  |  |  |  |  |
| 2  |              | Male: physical activity level, sitting >4 h/day, sleep <= 7 h/day, smoking and overweight. Female: externalization, sitting > 4h/day, overweight (33)                                                                                                                                                                                                                                                                                                                                                                                                                                                                                         |  |  |  |  |  |  |
| 3  |              | Increasing age (20, 27)                                                                                                                                                                                                                                                                                                                                                                                                                                                                                                                                                                                                                       |  |  |  |  |  |  |
| 4  |              | Increasing age, sex, family history of related diseases, VAS score assessed by physicians, elevated C-reactive protein (CRP), erythrocyte sedimentation rate (ESR), platelet count, lower score in psychosocial functioning reflecting mental health and functioning at school/work, within the family, with friends and in other social activities (Children's Global Assessment Scale, CGAS) (22)                                                                                                                                                                                                                                           |  |  |  |  |  |  |
| 5  | Low back     | Extension strength (minutes) and plain saggital mobility (36)                                                                                                                                                                                                                                                                                                                                                                                                                                                                                                                                                                                 |  |  |  |  |  |  |
| 6  |              | Akward trunk postures, physically demanding job (working hands above shoulders, awkward trunk posture and standing or walking), working regularly or irregularly, duration of work, work with specific physical load factors (31)                                                                                                                                                                                                                                                                                                                                                                                                             |  |  |  |  |  |  |
| 7  |              | BMI (32)                                                                                                                                                                                                                                                                                                                                                                                                                                                                                                                                                                                                                                      |  |  |  |  |  |  |
| 8  |              | Male: smoking 5-7 d/week vs. no smoking, smoking <9 cigarettes/day (30)                                                                                                                                                                                                                                                                                                                                                                                                                                                                                                                                                                       |  |  |  |  |  |  |
| 9  |              | High emotional vs. low emotional problems, reaching to a high shelf, sitting up in bed, bending down to put on socks, high conduct problems, high hyperactivity, high prosocial behavior, widespread pain, headache, stomachache in the past month compared to none, daytime tiredness on a scale 0-10, 5-10 vs. 0-4, pain start < 12 months ago, pain lasts <= 7 days, pain today, pain severity on a scale 0-10, 4-10 vs. 0-3, Hannover 2-3 vs. 0-1 (23)                                                                                                                                                                                    |  |  |  |  |  |  |
| 10 |              | Sex, increasing age, tobacco, profession: hairdresser and media/design compared to electrician, western ethnicity compared to non-western ethnicity, moderate/high vs. low socio-economic status (SES) (m), moderate/high vs. low physical activity level, BMI, moderate/high physical work demand vs. low (26)                                                                                                                                                                                                                                                                                                                               |  |  |  |  |  |  |
| 11 | Knee         | Increasing age compared to 15, participation in sports, BMI, EQ-5D index score 50-75th percentile compared to 75-100th, weekly pain frequency compared to monthly (34)                                                                                                                                                                                                                                                                                                                                                                                                                                                                        |  |  |  |  |  |  |
| 12 |              | BMI, EQ-5D 50-75th percentile compared to 0-25th, monthly, weekly, several times a week pain frequency compared to rarely (9)                                                                                                                                                                                                                                                                                                                                                                                                                                                                                                                 |  |  |  |  |  |  |
| 13 | Lower limb   | After 1 year follow-up: traumatic limb at baseline, exercise 3-4 t/week vs. 0-2 t, hypermobility score >= 6 vs. < 6. After 4 years follow-up: exercise frequency 5-7 t/week vs. 0-2 t, lower limb trauma at baseline. Common after both 1 and 4 years follow-up: age 11-14 vs. 9-11, frequency of exercise 2-4 times vs. once a week, multisite pain, female sex, headache, stomachache, depressive feelings, difficulty falling asleep, day tiredness, waking up during nights, school abscence due to pain vs. never absent, disability symptoms >=3 vs. <=2, volume .O2 max average or above, exercise frequency 3-4 t/week vs. 0-2 t (11) |  |  |  |  |  |  |
| 14 |              | Joint hypermobility Beighton 6-9, physical activity at least half and hour more than 3 times a week (38)                                                                                                                                                                                                                                                                                                                                                                                                                                                                                                                                      |  |  |  |  |  |  |
| 15 | Neck         | Sex, ethnicity, increasing age (39)                                                                                                                                                                                                                                                                                                                                                                                                                                                                                                                                                                                                           |  |  |  |  |  |  |
| 16 | Growing pain | Sex (19)                                                                                                                                                                                                                                                                                                                                                                                                                                                                                                                                                                                                                                      |  |  |  |  |  |  |
| 17 | Headache     | Pain frequency, pain in daily activities, physiotherapy, relaxation therapy, sport activity, stress at home or in hobbies, pain on palpation, pain threshold measured by dolorimeter, depressive symptoms, temporomandibular disorder, stress at school, use of computer (25)                                                                                                                                                                                                                                                                                                                                                                 |  |  |  |  |  |  |
| 18 |              | Stress (20)                                                                                                                                                                                                                                                                                                                                                                                                                                                                                                                                                                                                                                   |  |  |  |  |  |  |
| 19 | Widespread   | Female sex, increasing age, tender point count, CDI > 13 (n), Yunus criteria >=3, sleep score, disability index (f), psychosomatic symptoms (29)                                                                                                                                                                                                                                                                                                                                                                                                                                                                                              |  |  |  |  |  |  |
| 20 | Back         | Stress (20)                                                                                                                                                                                                                                                                                                                                                                                                                                                                                                                                                                                                                                   |  |  |  |  |  |  |

21  
 22 Prognostic factors are divided primarily in biological, psychological, and social factors and secondary according to musculoskeletal pain type. The prognostic value were reported with RR, OR, and/or p-value.  
 23  
 24  
 25  
 26  
 27  
 28  
 29  
 30  
 31  
 32  
 33  
 34  
 35  
 36  
 37  
 38  
 39  
 40  
 41  
 42  
 43  
 44  
 45  
 46

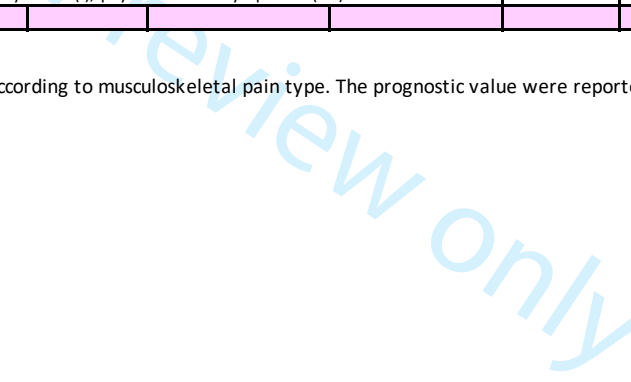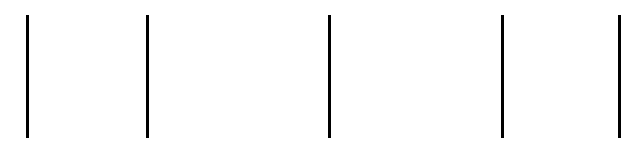

Supplement: bmjopen-2018-024921.draft_revisions.pdf [file bmjopen-2018-024921.draft_revisions.pdf]
