# Supplementary material for: Poor prognosis of child and adolescent musculoskeletal pain: a systematic literature review
Source: PubMed Central journal article supplement — BMJ Open. 2019 Jul 18;9(7):e024921. doi: 10.1136/bmjopen-2018-024921 (PMC6661566; doi:10.1136/bmjopen-2018-024921), 2019-07-18
Supplement: bmjopen-2018-024921supp001.pdf [file bmjopen-2018-024921supp001.pdf]

## Appendix 1

Search history

Medline Ovid May 30th 2017

|    |                                                                                                                                                                                                                                                                                                                                                                                                                                             |           |
|----|---------------------------------------------------------------------------------------------------------------------------------------------------------------------------------------------------------------------------------------------------------------------------------------------------------------------------------------------------------------------------------------------------------------------------------------------|-----------|
| 1  | back pain/ or headache/ or exp musculoskeletal pain/ or Abdominal Pain/ or Back Pain/ or Low Back Pain/ or exp Arthralgia/ or Chest Pain/ or Facial Pain/ or Flank Pain/ or Metatarsalgia/ or Neck Pain/                                                                                                                                                                                                                                    | 110,274   |
| 2  | Acute Pain/ or Chronic Pain/ or Breakthrough Pain/ or Pain, Intractable/ or Pain, Referred/                                                                                                                                                                                                                                                                                                                                                 | 16,079    |
| 3  | (musculoskeletal or back pain or backache or headache or joint or PFP or tendinitis or cervical or jaw or limb or shoulder or arm or elbow or wrist or carpal or hand or finger or collar or vertebral or lumbar or back or backache or back pain or headache or hip or knee or patella* or patellofemoral or retropatellar or leg or ankle or foot or heel or arthralgia or osteochondritis or osgood or growing pain* or scheuermann).mp. | 1,960,816 |
| 4  | 2 and 3                                                                                                                                                                                                                                                                                                                                                                                                                                     | 4,733     |
| 5  | (backache or headache).mp.                                                                                                                                                                                                                                                                                                                                                                                                                  | 78,052    |
| 6  | ((pain or ache) adj3 (musculoskeletal or back or joint or PFP or tendinitis or cervical or jaw or limb or shoulder or arm or elbow or wrist or carpal or hand or finger or collar or vertebral or lumbar or hip or knee or patella* or patellofemoral or retropatellar or leg or ankle or foot or heel or arthralgia or osteochondritis or osgood or growing pain* or scheuermann)).mp.                                                     | 103,970   |
| 7  | 1 or 4 or 5 or 6                                                                                                                                                                                                                                                                                                                                                                                                                            | 217,985   |
| 8  | limit 7 to "all child (0 to 18 years)"                                                                                                                                                                                                                                                                                                                                                                                                      | 41,139    |
| 9  | (juvenile or adolescen* or preadolescence or Preadolescent or preschool or child or children or prepubertal or kids or paediatric or pediatric or youth or young or childhood or schoolchild* or teenager).mp.                                                                                                                                                                                                                              | 3,721,647 |
| 10 | 7 and 9                                                                                                                                                                                                                                                                                                                                                                                                                                     | 54,465    |
| 11 | 8 or 10                                                                                                                                                                                                                                                                                                                                                                                                                                     | 55,016    |
| 12 | (predict* or long term or Follow-up or Prospective or cohort or cluster or prognosis or prognostic or Mediator* or treatment effect modifier* or longitudinal*).mp.                                                                                                                                                                                                                                                                         | 4,208,880 |
| 13 | 11 and 12                                                                                                                                                                                                                                                                                                                                                                                                                                   | 20,363    |
| 14 | (systematic reviews or meta analysis).pt.                                                                                                                                                                                                                                                                                                                                                                                                   | 80,495    |
| 15 | case report/ or (case reports or letter or historical article or comment or editorial).pt.                                                                                                                                                                                                                                                                                                                                                  | 3,595,207 |
| 16 | limit 13 to (systematic reviews or meta analysis)                                                                                                                                                                                                                                                                                                                                                                                           | 466       |
| 17 | 14 or 15                                                                                                                                                                                                                                                                                                                                                                                                                                    | 3,674,563 |
| 18 | 13 not (16 or 17)                                                                                                                                                                                                                                                                                                                                                                                                                           | 17,183    |

EMBASE Ovid May 31<sup>st</sup> 2017

|    |                                                                                                                                                                                                                                                                                                                                                                                                                                             |           |
|----|---------------------------------------------------------------------------------------------------------------------------------------------------------------------------------------------------------------------------------------------------------------------------------------------------------------------------------------------------------------------------------------------------------------------------------------------|-----------|
| 1  | exp *musculoskeletal pain/                                                                                                                                                                                                                                                                                                                                                                                                                  | 40,261    |
| 2  | exp *"headache and facial pain"/                                                                                                                                                                                                                                                                                                                                                                                                            | 73,629    |
| 3  | exp *abdominal pain/                                                                                                                                                                                                                                                                                                                                                                                                                        | 10,492    |
| 4  | *arthralgia/                                                                                                                                                                                                                                                                                                                                                                                                                                | 4,782     |
| 5  | *thorax pain/                                                                                                                                                                                                                                                                                                                                                                                                                               | 9,691     |
| 6  | *flank pain/                                                                                                                                                                                                                                                                                                                                                                                                                                | 245       |
| 7  | *metatarsalgia/                                                                                                                                                                                                                                                                                                                                                                                                                             | 522       |
| 8  | 1 or 2 or 3 or 4 or 5 or 6 or 7                                                                                                                                                                                                                                                                                                                                                                                                             | 137,602   |
| 9  | *chronic pain/                                                                                                                                                                                                                                                                                                                                                                                                                              | 20,500    |
| 10 | *breakthrough pain/                                                                                                                                                                                                                                                                                                                                                                                                                         | 346       |
| 11 | *intractable pain/                                                                                                                                                                                                                                                                                                                                                                                                                          | 2,166     |
| 12 | *referred pain/                                                                                                                                                                                                                                                                                                                                                                                                                             | 233       |
| 13 | or/9-12                                                                                                                                                                                                                                                                                                                                                                                                                                     | 23,135    |
| 14 | (musculoskeletal or back pain or backache or headache or joint or PFP or tendinitis or cervical or jaw or limb or shoulder or arm or elbow or wrist or carpal or hand or finger or collar or vertebral or lumbar or back or backache or back pain or headache or hip or knee or patella* or patellofemoral or retropatellar or leg or ankle or foot or heel or arthralgia or osteochondritis or osgood or growing pain* or scheuermann).mp. | 2,678,325 |
| 15 | 13 and 14                                                                                                                                                                                                                                                                                                                                                                                                                                   | 8,147     |
| 16 | (backache or headache).mp.                                                                                                                                                                                                                                                                                                                                                                                                                  | 261,495   |
| 17 | ((pain or ache) adj3 (musculoskeletal or back or joint or PFP or tendinitis or cervical or jaw or limb or shoulder or arm or elbow or wrist or carpal or hand or finger or collar or vertebral or lumbar or hip or knee or patella* or patellofemoral or retropatellar or leg or ankle or foot or heel or arthralgia or osteochondritis or osgood or growing pain* or scheuermann)).mp.                                                     | 171,769   |
| 18 | 8 or 15 or 16 or 17                                                                                                                                                                                                                                                                                                                                                                                                                         | 450,426   |
| 19 | limit 18 to (infant <to one year> or child <unspecified age> or preschool child <1 to 6 years> or school child <7 to 12 years> or adolescent <13 to 17 years>)                                                                                                                                                                                                                                                                              | 54,948    |
| 20 | (juvenile or adolescen* or preadolescence or Preadolescent or preschool or child or children or prepubertal or kids or paediatric or pediatric or youth or young or childhood or schoolchild* or teenager).mp.                                                                                                                                                                                                                              | 3,594,291 |
| 21 | 18 and 20                                                                                                                                                                                                                                                                                                                                                                                                                                   | 79,053    |
| 22 | 19 or 21                                                                                                                                                                                                                                                                                                                                                                                                                                    | 79,102    |

|    |                                                                                                                                                                     |           |
|----|---------------------------------------------------------------------------------------------------------------------------------------------------------------------|-----------|
| 23 | (predict* or long term or Follow-up or Prospective or cohort or cluster or prognosis or prognostic or Mediator* or treatment effect modifier* or longitudinal*).mp. | 5,319,110 |
| 24 | 22 and 23                                                                                                                                                           | 28,128    |
| 25 | limit 24 to ("systematic review" or meta analysis)                                                                                                                  | 497       |
| 26 | case report/ or (letter or editorial or conference*).pt.                                                                                                            | 6,706,285 |
| 27 | 25 or 26                                                                                                                                                            | 6,706,709 |
| 28 | 24 not 27                                                                                                                                                           | 17,726    |

CINAHL Ebsco May 31<sup>st</sup> 2017

| I   | Search Terms                                                                                                                                                                                                                                                                                                                                                                      | Search Options                                                                                                                                                                       | Results |
|-----|-----------------------------------------------------------------------------------------------------------------------------------------------------------------------------------------------------------------------------------------------------------------------------------------------------------------------------------------------------------------------------------|--------------------------------------------------------------------------------------------------------------------------------------------------------------------------------------|---------|
| S18 | S16 not S17                                                                                                                                                                                                                                                                                                                                                                       | Search modes - Boolean/Phrase                                                                                                                                                        | 3,716   |
| S17 | PT (Systematic Review or Meta Analysis)                                                                                                                                                                                                                                                                                                                                           | Search modes - Boolean/Phrase                                                                                                                                                        | 41,837  |
| S16 | S14 AND S15                                                                                                                                                                                                                                                                                                                                                                       | Search modes - Boolean/Phrase                                                                                                                                                        | 3,802   |
| S15 | (predict* or long term or Follow-up or Prospective or cohort or cluster or prognosis or prognostic or Mediator* or treatment effect modifier* or longitudinal*)                                                                                                                                                                                                                   | Search modes - Boolean/Phrase                                                                                                                                                        | 530,171 |
| S14 | S11 OR S13                                                                                                                                                                                                                                                                                                                                                                        | Search modes - Boolean/Phrase                                                                                                                                                        | 11,516  |
| S13 | S10 AND S12                                                                                                                                                                                                                                                                                                                                                                       | Search modes - Boolean/Phrase                                                                                                                                                        | 11,425  |
| S12 | (juvenile or adolescen* or preadolescence or Preadolescent or preschool or child or children or prepubertal or kids or paediatric or pediatric or youth or young or childhood or schoolchild* or teenager)                                                                                                                                                                        | Search modes - Boolean/Phrase                                                                                                                                                        | 590,118 |
| S11 | S1 OR S7 OR S8 OR S9                                                                                                                                                                                                                                                                                                                                                              | Limiters - Age Groups: Infant, Newborn: birth-1 month, Infant: 1-23 months, Child, Preschool: 2-5 years, Child: 6-12 years, Adolescent: 13-18 years<br>Search modes - Boolean/Phrase | 8,712   |
| S10 | S1 OR S7 OR S8 OR S9                                                                                                                                                                                                                                                                                                                                                              | Search modes - Boolean/Phrase                                                                                                                                                        | 64,982  |
| S9  | ((pain or ache) N3 (musculoskeletal or back or joint or PFP or tendinitis or cervical or jaw or limb or shoulder or arm or elbow or wrist or carpal or hand or finger or collar or vertebral or lumbar or hip or knee or patella* or patellofemoral or retropatellar or leg or ankle or foot or heel or arthralgia or osteochondritis or osgood or growing pain* or scheuermann)) | Search modes - Boolean/Phrase                                                                                                                                                        | 37,883  |
| S8  | backache or headache                                                                                                                                                                                                                                                                                                                                                              | Search modes - Boolean/Phrase                                                                                                                                                        | 16,417  |
| S7  | S5 AND S6                                                                                                                                                                                                                                                                                                                                                                         | Search modes - Boolean/Phrase                                                                                                                                                        | 4,707   |

|    |                                                                                                                                                                                                                                                                                                                                                                                                                                         |                               |         |
|----|-----------------------------------------------------------------------------------------------------------------------------------------------------------------------------------------------------------------------------------------------------------------------------------------------------------------------------------------------------------------------------------------------------------------------------------------|-------------------------------|---------|
| S6 | (musculoskeletal or back pain or backache or headache or joint or PFP or tendinitis or cervical or jaw or limb or shoulder or arm or elbow or wrist or carpal or hand or finger or collar or vertebral or lumbar or back or backache or back pain or headache or hip or knee or patella* or patellofemoral or retropatellar or leg or ankle or foot or heel or arthralgia or osteochondritis or osgood or growing pain* or scheuermann) | Search modes - Boolean/Phrase | 312,634 |
| S5 | S2 OR S3 OR S4                                                                                                                                                                                                                                                                                                                                                                                                                          | Search modes - Boolean/Phrase | 12,235  |
| S4 | (MH "Referred Pain")                                                                                                                                                                                                                                                                                                                                                                                                                    | Search modes - Boolean/Phrase | 284     |
| S3 | (MH "Breakthrough Pain")                                                                                                                                                                                                                                                                                                                                                                                                                | Search modes - Boolean/Phrase | 58      |
| S2 | (MH "Chronic Pain")                                                                                                                                                                                                                                                                                                                                                                                                                     | Search modes - Boolean/Phrase | 11,921  |
| S1 | (MH "Back Pain") OR (MH "Low Back Pain") OR (MH "Facial Pain") OR (MH "Headache") OR (MH "Knee Pain+") OR (MH "Metatarsalgia") OR (MH "Muscle Pain") OR (MH "Neck Pain") OR (MH "Arthralgia") OR (MH "Shoulder Pain") OR (MH "Chest Pain") OR (MH "Elbow Pain") OR (MH "Heel Pain") OR (MH "Abdominal Pain")                                                                                                                            | Search modes - Boolean/Phrase | 40,609  |

Cochrane June 9<sup>th</sup> 2017

Search Name:

Date Run: 09/06/17 10:28:15.152

Description:

ID Search Hits

#1 ((pain or ache) next/3 (musculoskeletal or back pain or backache or headache or joint or PFP or tendinitis or cervical or jaw or limb or shoulder or arm or elbow or wrist or carpal or hand or finger or collar or vertebral or lumbar or back or backache or back pain or headache or hip or knee or patella\* or patellofemoral or retropatellar or leg or ankle or foot or heel or arthralgia or osteochondritis or osgood or growing pain\* or scheuermann)) 7405

#2 (backache or headache) 26356

#3 #1 or #2 32236

#4 (juvenile or adolescen\* or preadolescence or Preadolescent or preschool or child or children or prepubertal or kids or paediatric or pediatric or youth or young or childhood or schoolchild\* or teenager) 243010

#5 #3 and #4 8870

#6 (predict\* or long term or Follow-up or Prospective or cohort or cluster or prognosis or prognostic or Mediator\* or treatment effect modifier\* or longitudinal\*) 399020

#7 #5 and #6 4430

All Results (4430)

Cochrane Reviews (1311)

All

Review

Protocol

Other Reviews (66)

Trials (3002)

Methods Studies (0)

Technology Assessments (4)

Economic Evaluations (34)

Cochrane Groups (13)

Imported: Trial, Technology, Economic

# Web of Science June 9<sup>th</sup> 2017

| Set | Results                                                                                                                                                                                                                                                                                                                                                                                                                                                                                                                                         | Save History / Create Alert | Open Saved History | Edit Sets | Combine Sets<br>AND OR<br>Combine | Delete Sets<br>Select All<br>Delete |
|-----|-------------------------------------------------------------------------------------------------------------------------------------------------------------------------------------------------------------------------------------------------------------------------------------------------------------------------------------------------------------------------------------------------------------------------------------------------------------------------------------------------------------------------------------------------|-----------------------------|--------------------|-----------|-----------------------------------|-------------------------------------|
| # 9 | 11,624 #8 AND #7<br><i>Indexes=SCI-EXPANDED, SSCI, A&amp;HCI, CPCI-S, CPCI-SSH, ESCI Timespan=All years</i>                                                                                                                                                                                                                                                                                                                                                                                                                                     |                             |                    | Edit      | <input type="checkbox"/>          | <input type="checkbox"/>            |
| # 8 | 5,905,200 ts=(predict* or long term or Follow-up or Prospective or cohort or cluster or prognosis or prognostic or Mediator* or treatment effect modifier* or longitudinal*)<br><i>Indexes=SCI-EXPANDED, SSCI, A&amp;HCI, CPCI-S, CPCI-SSH, ESCI Timespan=All years</i>                                                                                                                                                                                                                                                                         |                             |                    | Edit      | <input type="checkbox"/>          | <input type="checkbox"/>            |
| # 7 | 29,467 #6 AND #5<br><i>Indexes=SCI-EXPANDED, SSCI, A&amp;HCI, CPCI-S, CPCI-SSH, ESCI Timespan=All years</i>                                                                                                                                                                                                                                                                                                                                                                                                                                     |                             |                    | Edit      | <input type="checkbox"/>          | <input type="checkbox"/>            |
| # 6 | 2,457,687 ts=(juvenile or adolescen* or preadolescence or Preadolescent or preschool or child or children or prepubertal or kids or paediatric or pediatric or youth or young or childhood or schoolchild* or teenager)<br><i>Indexes=SCI-EXPANDED, SSCI, A&amp;HCI, CPCI-S, CPCI-SSH, ESCI Timespan=All years</i>                                                                                                                                                                                                                              |                             |                    | Edit      | <input type="checkbox"/>          | <input type="checkbox"/>            |
| # 5 | 240,860 #4 OR #3<br><i>Indexes=SCI-EXPANDED, SSCI, A&amp;HCI, CPCI-S, CPCI-SSH, ESCI Timespan=All years</i>                                                                                                                                                                                                                                                                                                                                                                                                                                     |                             |                    | Edit      | <input type="checkbox"/>          | <input type="checkbox"/>            |
| # 4 | 66,234 ts=(backache or headache)<br><i>Indexes=SCI-EXPANDED, SSCI, A&amp;HCI, CPCI-S, CPCI-SSH, ESCI Timespan=All years</i>                                                                                                                                                                                                                                                                                                                                                                                                                     |                             |                    | Edit      | <input type="checkbox"/>          | <input type="checkbox"/>            |
| # 3 | 191,133 #2 AND #1<br><i>Indexes=SCI-EXPANDED, SSCI, A&amp;HCI, CPCI-S, CPCI-SSH, ESCI Timespan=All years</i>                                                                                                                                                                                                                                                                                                                                                                                                                                    |                             |                    | Edit      | <input type="checkbox"/>          | <input type="checkbox"/>            |
| # 2 | 2,616,397 TS=(musculoskeletal or back pain or backache or headache or joint or PFP or tendinitis or cervical or jaw or limb or shoulder or arm or elbow or wrist or carpal or hand or finger or collar or vertebral or lumbar or back or backache or back pain or headache or hip or knee or patella* or patellofemoral or retropatellar or leg or ankle or foot or heel or arthralgia or osteochondritis or osgood or growing pain* or scheuermann)<br><i>Indexes=SCI-EXPANDED, SSCI, A&amp;HCI, CPCI-S, CPCI-SSH, ESCI Timespan=All years</i> |                             |                    | Edit      | <input type="checkbox"/>          | <input type="checkbox"/>            |
| # 1 | 491,777 ts=(pain or ache)<br><i>Indexes=SCI-EXPANDED, SSCI, A&amp;HCI, CPCI-S, CPCI-SSH, ESCI Timespan=All years</i>                                                                                                                                                                                                                                                                                                                                                                                                                            |                             |                    | Edit      | <input type="checkbox"/>          | <input type="checkbox"/>            |
|     |                                                                                                                                                                                                                                                                                                                                                                                                                                                                                                                                                 |                             |                    |           | AND OR<br>Combine                 | Select All<br>Delete                |

SportDiscus June 9<sup>th</sup> 2017

|    |                                                                                                                                                                                                                                                                                                                                                                                   |                               |         |
|----|-----------------------------------------------------------------------------------------------------------------------------------------------------------------------------------------------------------------------------------------------------------------------------------------------------------------------------------------------------------------------------------|-------------------------------|---------|
| S7 | ((predict* or long term or Follow-up or Prospective or cohort or cluster or prognosis or prognostic or Mediator* or treatment effect modifier* or longitudinal*)) AND (S5 AND S6)                                                                                                                                                                                                 | Search modes - Boolean/Phrase | 843     |
| S6 | (predict* or long term or Follow-up or Prospective or cohort or cluster or prognosis or prognostic or Mediator* or treatment effect modifier* or longitudinal*)                                                                                                                                                                                                                   | Search modes - Boolean/Phrase | 118,227 |
| S5 | S3 AND S4                                                                                                                                                                                                                                                                                                                                                                         | Search modes - Boolean/Phrase | 2,876   |
| S4 | (juvenile or adolescen* or preadolescence or Preadolescent or preschool or child or children or prepubertal or kids or paediatric or pediatric or youth or young or childhood or schoolchild* or teenager)                                                                                                                                                                        | Search modes - Boolean/Phrase | 200,385 |
| S3 | (S1 OR S2)                                                                                                                                                                                                                                                                                                                                                                        | Search modes - Boolean/Phrase | 25,984  |
| S2 | backache or headache                                                                                                                                                                                                                                                                                                                                                              | Search modes - Boolean/Phrase | 12,066  |
| S1 | ((pain or ache) N3 (musculoskeletal or back or joint or PFP or tendinitis or cervical or jaw or limb or shoulder or arm or elbow or wrist or carpal or hand or finger or collar or vertebral or lumbar or hip or knee or patella* or patellofemoral or retropatellar or leg or ankle or foot or heel or arthralgia or osteochondritis or osgood or growing pain* or scheuermann)) | Search modes - Boolean/Phrase | 18,440  |



OT-seeker June 9<sup>th</sup> 2017

((pain or ache)

AND

(musculoskeletal or back pain or backache or headache or joint or PFP or tendinitis or cervical or jaw or limb or shoulder or arm or elbow or wrist or carpal or hand or finger or collar or vertebral or lumbar or back or backache or back pain or headache or hip or knee or patella\* or patellofemoral or retropatellar or leg or ankle or foot or heel or arthralgia or osteochondritis or osgood or growing pain\* or scheuermann))

AND

juvenile or adolescen\* or preadolescence or Preadolescent or preschool or child or children or prepubertal or kids or paediatric or pediatric or youth or young or childhood or schoolchild\* or teenager

PsychInfo June 9<sup>th</sup> 2017

|    |                                                                                                                                                                                                                                                                                                                                                                                                                                             |         |
|----|---------------------------------------------------------------------------------------------------------------------------------------------------------------------------------------------------------------------------------------------------------------------------------------------------------------------------------------------------------------------------------------------------------------------------------------------|---------|
| 1  | exp Musculoskeletal Disorders/                                                                                                                                                                                                                                                                                                                                                                                                              | 15,728  |
| 2  | headache/ or muscle contraction headache/                                                                                                                                                                                                                                                                                                                                                                                                   | 7,110   |
| 3  | myofascial pain/                                                                                                                                                                                                                                                                                                                                                                                                                            | 317     |
| 4  | back pain/                                                                                                                                                                                                                                                                                                                                                                                                                                  | 3,411   |
| 5  | or/1-4                                                                                                                                                                                                                                                                                                                                                                                                                                      | 25,776  |
| 6  | chronic pain/                                                                                                                                                                                                                                                                                                                                                                                                                               | 11,631  |
| 7  | pain/                                                                                                                                                                                                                                                                                                                                                                                                                                       | 22,243  |
| 8  | 6 or 7                                                                                                                                                                                                                                                                                                                                                                                                                                      | 33,184  |
| 9  | (musculoskeletal or back pain or backache or headache or joint or PFP or tendinitis or cervical or jaw or limb or shoulder or arm or elbow or wrist or carpal or hand or finger or collar or vertebral or lumbar or back or backache or back pain or headache or hip or knee or patella* or patellofemoral or retropatellar or leg or ankle or foot or heel or arthralgia or osteochondritis or osgood or growing pain* or scheuermann).mp. | 220,772 |
| 10 | 8 and 9                                                                                                                                                                                                                                                                                                                                                                                                                                     | 9,266   |
| 11 | (backache or headache).mp.                                                                                                                                                                                                                                                                                                                                                                                                                  | 18,772  |
| 12 | ((pain or ache) adj3 (musculoskeletal or back or joint or PFP or tendinitis or cervical or jaw or limb or shoulder or arm or elbow or wrist or carpal or hand or finger or collar or vertebral or lumbar or hip or knee or patella* or patellofemoral or retropatellar or leg or ankle or foot or heel or arthralgia or osteochondritis or osgood or growing pain* or scheuermann)).mp.                                                     | 9,290   |
| 13 | 5 or 10 or 11 or 12                                                                                                                                                                                                                                                                                                                                                                                                                         | 43,824  |
| 14 | limit 13 to (100 childhood <birth to age 12 yrs> or 200 adolescence <age 13 to 17 yrs>)                                                                                                                                                                                                                                                                                                                                                     | 5,603   |
| 15 | (juvenile or adolescen* or preadolescence or Preadolescent or preschool or child or children or prepubertal or kids or paediatric or pediatric or youth or young or childhood or schoolchild* or teenager).mp.                                                                                                                                                                                                                              | 895,379 |
| 16 | 13 and 15                                                                                                                                                                                                                                                                                                                                                                                                                                   | 5,465   |
| 17 | 14 or 16                                                                                                                                                                                                                                                                                                                                                                                                                                    | 7,676   |
| 18 | (predict* or long term or Follow-up or Prospective or cohort or cluster or prognosis or prognostic or Mediator* or treatment effect modifier* or longitudinal*).mp.                                                                                                                                                                                                                                                                         | 723,493 |
| 19 | 17 and 18                                                                                                                                                                                                                                                                                                                                                                                                                                   | 2,119   |
| 20 | ((systematic or method*) adj3 (review* or overview* or study or studies or search* or approach*)) or meta analy* or meta-analy* or metaanaly*).ti,ab,id.                                                                                                                                                                                                                                                                                    | 142,307 |
| 21 | limit 19 to ("0830 systematic review" or 1200 meta analysis)                                                                                                                                                                                                                                                                                                                                                                                | 36      |
| 22 | 21 or 20                                                                                                                                                                                                                                                                                                                                                                                                                                    | 142,310 |

|    |                                |        |
|----|--------------------------------|--------|
| 23 | 19 not 22                      | 1,971  |
| 1  | exp Musculoskeletal Disorders/ | 15,728 |

## Search history 01.02.2019

PubMed 31.05.2017-01.02.2019

### History

[Download history](#)[Clear history](#)

| Search              | Add to builder      | Query                                                                                                                                                                                                                                                                                                                                                                                                                                                                                                                                                                                                                                                                                                                                                                                                                                                                                                                                                                                                                                                                                                                                                                                                                                                                                                                                                                                                                                                                                                                                                                                                                                                                                                                                                                                                                                                                                                                                                                                                                                                                                                                                                                                                                                                                                                                                                                                                                                                                                                                                                                                                                                                                                                                                                                                                                                                                                                                                                                                                                                                                                                                                               | Items found          |
|---------------------|---------------------|-----------------------------------------------------------------------------------------------------------------------------------------------------------------------------------------------------------------------------------------------------------------------------------------------------------------------------------------------------------------------------------------------------------------------------------------------------------------------------------------------------------------------------------------------------------------------------------------------------------------------------------------------------------------------------------------------------------------------------------------------------------------------------------------------------------------------------------------------------------------------------------------------------------------------------------------------------------------------------------------------------------------------------------------------------------------------------------------------------------------------------------------------------------------------------------------------------------------------------------------------------------------------------------------------------------------------------------------------------------------------------------------------------------------------------------------------------------------------------------------------------------------------------------------------------------------------------------------------------------------------------------------------------------------------------------------------------------------------------------------------------------------------------------------------------------------------------------------------------------------------------------------------------------------------------------------------------------------------------------------------------------------------------------------------------------------------------------------------------------------------------------------------------------------------------------------------------------------------------------------------------------------------------------------------------------------------------------------------------------------------------------------------------------------------------------------------------------------------------------------------------------------------------------------------------------------------------------------------------------------------------------------------------------------------------------------------------------------------------------------------------------------------------------------------------------------------------------------------------------------------------------------------------------------------------------------------------------------------------------------------------------------------------------------------------------------------------------------------------------------------------------------------------|----------------------|
| <a href="#">#60</a> | <a href="#">Add</a> | Search (((((((((((((((("Back Pain"[Mesh:NoExp]) OR "Musculoskeletal Pain"[Mesh]) OR "Abdominal Pain"[Mesh:NoExp]) OR "Low Back Pain"[Mesh]) OR "Arthralgia"[Mesh]) OR "Chest Pain"[Mesh]) OR "Facial Pain"[Mesh:NoExp]) OR "Flank Pain"[Mesh]) OR "Metatarsalgia"[Mesh:NoExp]) OR "Neck Pain"[Mesh])) OR (((("Acute Pain"[Mesh]) OR "Chronic Pain"[Mesh]) OR "Breakthrough Pain"[Mesh]) OR "Pain, Intractable"[Mesh]) OR "Pain, Referred"[Mesh])) AND ((musculoskeletal[Text Word] OR back pain[Text Word] OR backache[Text Word] OR headache[Text Word] OR joint[Text Word] OR PFP[Text Word] OR tendinitis[Text Word] OR cervical[Text Word] OR jaw[Text Word] OR limb[Text Word] OR shoulder[Text Word] OR arm[Text Word] OR elbow[Text Word] OR wrist[Text Word] OR carpal[Text Word] OR hand[Text Word] OR finger[Text Word] OR collar[Text Word] OR vertebral[Text Word] OR lumbar[Text Word] OR back[Text Word] OR backache[Text Word] OR back pain[Text Word] OR headache[Text Word] OR hip[Text Word] OR knee[Text Word] OR patella*[Text Word] OR patellofemoral[Text Word] OR retropatellar[Text Word] OR leg[Text Word] OR ankle[Text Word] OR foot[Text Word] OR heel[Text Word] OR arthralgia[Text Word] OR osteochondritis[Text Word] OR osgood[Text Word] OR growing pain*[Text Word] OR scheuermann[Text Word]))) OR ((backache[Text Word] OR headache[Text Word])) OR (((pain[Text Word] OR ache[Text Word])) AND (musculoskeletal[Text Word] OR back[Text Word] OR joint[Text Word] OR PFP[Text Word] OR tendinitis[Text Word] OR cervical[Text Word] OR jaw[Text Word] OR limb[Text Word] OR shoulder[Text Word] OR arm[Text Word] OR elbow[Text Word] OR wrist[Text Word] OR carpal[Text Word] OR hand[Text Word] OR finger[Text Word] OR collar[Text Word] OR vertebral[Text Word] OR lumbar[Text Word] OR hip[Text Word] OR knee[Text Word] OR patella*[Text Word] OR patellofemoral[Text Word] OR retropatellar[Text Word] OR leg[Text Word] OR ankle[Text Word] OR foot[Text Word] OR heel[Text Word] OR arthralgia[Text Word] OR osteochondritis[Text Word] OR osgood[Text Word] OR growing pain*[Text Word] OR scheuermann[Text Word]))) AND (((juvenile[Text Word] OR adolescen*[Text Word] OR preadolescence[Text Word] OR Preadolescent[Text Word] OR preschool[Text Word] OR child[Text Word] OR children[Text Word] OR prepubertal[Text Word] OR kids[Text Word] OR paediatric[Text Word] OR pediatric[Text Word] OR youth[Text Word] OR young[Text Word] OR childhood[Text Word] OR schoolchild*[Text Word] OR teenager[Text Word])) OR (((("Adolescent"[Mesh]) OR "Child"[Mesh]) OR "Infant"[Mesh]))) AND ((predict*[Text Word] OR long term[Text Word] OR Follow-up[Text Word] OR Prospective[Text Word] OR cohort[Text Word] OR cluster[Text Word] OR prognosis[Text Word] OR prognostic[Text Word] OR Mediator*[Text Word] OR treatment effect modifier*[Text Word] OR longitudinal*[Text Word]))) NOT (((("Systematic Review" [Publication Type]) OR "Meta-Analysis" [Publication Type]) OR "Case Reports" [Publication Type]) OR "Letter" [Publication Type]) OR "Historical Article" [Publication Type]) OR | <a href="#">2514</a> |

| Search              | Add to builder      | Query                                                                                                                                                                                                                                                                                                                                                                                                                                                                                                                                                                                                                                                                                                                                                                                                                                                                                                                                                                                                                                                                                                                                                                                                                                                                                                                                                                                                                                                                                                                                                                                                                                                                                                                                                                                                                                                                                                                                                                                                                                                                                                                                                                                                                                                                                                                                                                                                                                                                                                                                                                                                                                                                                                                                                                                                                                                                                                                                                                                                                                                                                                                                                                                                                | Items found             |
|---------------------|---------------------|----------------------------------------------------------------------------------------------------------------------------------------------------------------------------------------------------------------------------------------------------------------------------------------------------------------------------------------------------------------------------------------------------------------------------------------------------------------------------------------------------------------------------------------------------------------------------------------------------------------------------------------------------------------------------------------------------------------------------------------------------------------------------------------------------------------------------------------------------------------------------------------------------------------------------------------------------------------------------------------------------------------------------------------------------------------------------------------------------------------------------------------------------------------------------------------------------------------------------------------------------------------------------------------------------------------------------------------------------------------------------------------------------------------------------------------------------------------------------------------------------------------------------------------------------------------------------------------------------------------------------------------------------------------------------------------------------------------------------------------------------------------------------------------------------------------------------------------------------------------------------------------------------------------------------------------------------------------------------------------------------------------------------------------------------------------------------------------------------------------------------------------------------------------------------------------------------------------------------------------------------------------------------------------------------------------------------------------------------------------------------------------------------------------------------------------------------------------------------------------------------------------------------------------------------------------------------------------------------------------------------------------------------------------------------------------------------------------------------------------------------------------------------------------------------------------------------------------------------------------------------------------------------------------------------------------------------------------------------------------------------------------------------------------------------------------------------------------------------------------------------------------------------------------------------------------------------------------------|-------------------------|
|                     |                     | "Comment" [Publication Type]) OR "Editorial" [Publication Type]) Filters: Publication date from 2017/05/31 to 2019/12/31                                                                                                                                                                                                                                                                                                                                                                                                                                                                                                                                                                                                                                                                                                                                                                                                                                                                                                                                                                                                                                                                                                                                                                                                                                                                                                                                                                                                                                                                                                                                                                                                                                                                                                                                                                                                                                                                                                                                                                                                                                                                                                                                                                                                                                                                                                                                                                                                                                                                                                                                                                                                                                                                                                                                                                                                                                                                                                                                                                                                                                                                                             |                         |
| <a href="#">#59</a> | <a href="#">Add</a> | Search (((((((((((((((("Back Pain"[Mesh:NoExp]) OR "Musculoskeletal Pain"[Mesh]) OR "Abdominal Pain"[Mesh:NoExp]) OR "Low Back Pain"[Mesh]) OR "Arthralgia"[Mesh]) OR "Chest Pain"[Mesh]) OR "Facial Pain"[Mesh:NoExp]) OR "Flank Pain"[Mesh]) OR "Metatarsalgia"[Mesh:NoExp]) OR "Neck Pain"[Mesh])) OR (((("Acute Pain"[Mesh]) OR "Chronic Pain"[Mesh]) OR "Breakthrough Pain"[Mesh]) OR "Pain, Intractable"[Mesh]) OR "Pain, Referred"[Mesh])) AND ((musculoskeletal[Text Word] OR back pain[Text Word] OR backache[Text Word] OR headache[Text Word] OR joint[Text Word] OR PFP[Text Word] OR tendinitis[Text Word] OR cervical[Text Word] OR jaw[Text Word] OR limb[Text Word] OR shoulder[Text Word] OR arm[Text Word] OR elbow[Text Word] OR wrist[Text Word] OR carpal[Text Word] OR hand[Text Word] OR finger[Text Word] OR collar[Text Word] OR vertebral[Text Word] OR lumbar[Text Word] OR back[Text Word] OR backache[Text Word] OR back pain[Text Word] OR headache[Text Word] OR hip[Text Word] OR knee[Text Word] OR patella*[Text Word] OR patellofemoral[Text Word] OR retropatellar[Text Word] OR leg[Text Word] OR ankle[Text Word] OR foot[Text Word] OR heel[Text Word] OR arthralgia[Text Word] OR osteochondritis[Text Word] OR osgood[Text Word] OR growing pain*[Text Word] OR scheuermann[Text Word]))) OR ((backache[Text Word] OR headache[Text Word])) OR (((pain[Text Word] OR ache[Text Word])) AND (musculoskeletal[Text Word] OR back[Text Word] OR joint[Text Word] OR PFP[Text Word] OR tendinitis[Text Word] OR cervical[Text Word] OR jaw[Text Word] OR limb[Text Word] OR shoulder[Text Word] OR arm[Text Word] OR elbow[Text Word] OR wrist[Text Word] OR carpal[Text Word] OR hand[Text Word] OR finger[Text Word] OR collar[Text Word] OR vertebral[Text Word] OR lumbar[Text Word] OR hip[Text Word] OR knee[Text Word] OR patella*[Text Word] OR patellofemoral[Text Word] OR retropatellar[Text Word] OR leg[Text Word] OR ankle[Text Word] OR foot[Text Word] OR heel[Text Word] OR arthralgia[Text Word] OR osteochondritis[Text Word] OR osgood[Text Word] OR growing pain*[Text Word] OR scheuermann[Text Word]))) AND (((juvenile[Text Word] OR adolescen*[Text Word] OR preadolescence[Text Word] OR Preadolescent[Text Word] OR preschool[Text Word] OR child[Text Word] OR children[Text Word] OR prepubertal[Text Word] OR kids[Text Word] OR paediatric[Text Word] OR pediatric[Text Word] OR youth[Text Word] OR young[Text Word] OR childhood[Text Word] OR schoolchild*[Text Word] OR teenager[Text Word])) OR (((("Adolescent"[Mesh]) OR "Child"[Mesh]) OR "Infant"[Mesh]))) AND ((predict*[Text Word] OR long term[Text Word] OR Follow-up[Text Word] OR Prospective[Text Word] OR cohort[Text Word] OR cluster[Text Word] OR prognosis[Text Word] OR prognostic[Text Word] OR Mediator*[Text Word] OR treatment effect modifier*[Text Word] OR longitudinal*[Text Word]))) NOT (((("Systematic Review" [Publication Type]) OR "Meta-Analysis" [Publication Type]) OR "Case Reports" [Publication Type]) OR "Letter" [Publication Type]) OR "Historical Article" [Publication Type]) OR "Comment" [Publication Type]) OR "Editorial" [Publication Type]) | <a href="#">29128</a>   |
| <a href="#">#58</a> | <a href="#">Add</a> | Search (((("Systematic Review" [Publication Type]) OR "Meta-Analysis" [Publication Type]) OR "Case Reports" [Publication Type]) OR "Letter" [Publication Type]) OR "Historical Article" [Publication Type]) OR "Comment" [Publication Type]) OR "Editorial" [Publication Type]                                                                                                                                                                                                                                                                                                                                                                                                                                                                                                                                                                                                                                                                                                                                                                                                                                                                                                                                                                                                                                                                                                                                                                                                                                                                                                                                                                                                                                                                                                                                                                                                                                                                                                                                                                                                                                                                                                                                                                                                                                                                                                                                                                                                                                                                                                                                                                                                                                                                                                                                                                                                                                                                                                                                                                                                                                                                                                                                       | <a href="#">3926007</a> |
| <a href="#">#43</a> | <a href="#">Add</a> | Search (((((((((((((((("Back Pain"[Mesh:NoExp]) OR "Musculoskeletal Pain"[Mesh]) OR "Abdominal Pain"[Mesh:NoExp]) OR "Low Back Pain"[Mesh]) OR "Arthralgia"[Mesh]) OR "Chest Pain"[Mesh]) OR "Facial Pain"[Mesh:NoExp]) OR "Flank Pain"[Mesh]) OR "Metatarsalgia"[Mesh:NoExp]) OR "Neck Pain"[Mesh])) OR (((("Acute Pain"[Mesh]) OR "Chronic Pain"[Mesh]) OR "Breakthrough Pain"[Mesh]) OR "Pain, Intractable"[Mesh]) OR "Pain, Referred"[Mesh])) AND ((musculoskeletal[Text Word] OR back pain[Text Word] OR backache[Text Word] OR headache[Text Word] OR joint[Text                                                                                                                                                                                                                                                                                                                                                                                                                                                                                                                                                                                                                                                                                                                                                                                                                                                                                                                                                                                                                                                                                                                                                                                                                                                                                                                                                                                                                                                                                                                                                                                                                                                                                                                                                                                                                                                                                                                                                                                                                                                                                                                                                                                                                                                                                                                                                                                                                                                                                                                                                                                                                                               | <a href="#">33553</a>   |

| Search | Add to builder      | Query                                                                                                                                                                                                                                                                                                                                                                                                                                                                                                                                                                                                                                                                                                                                                                                                                                                                                                                                                                                                                                                                                                                                                                                                                                                                                                                                                                                                                                                                                                                                                                                                                                                                                                                                                                                                                                                                                                                                                                                                                                                                                                                                                                                                                                                                                                                                                                       | Items found             |
|--------|---------------------|-----------------------------------------------------------------------------------------------------------------------------------------------------------------------------------------------------------------------------------------------------------------------------------------------------------------------------------------------------------------------------------------------------------------------------------------------------------------------------------------------------------------------------------------------------------------------------------------------------------------------------------------------------------------------------------------------------------------------------------------------------------------------------------------------------------------------------------------------------------------------------------------------------------------------------------------------------------------------------------------------------------------------------------------------------------------------------------------------------------------------------------------------------------------------------------------------------------------------------------------------------------------------------------------------------------------------------------------------------------------------------------------------------------------------------------------------------------------------------------------------------------------------------------------------------------------------------------------------------------------------------------------------------------------------------------------------------------------------------------------------------------------------------------------------------------------------------------------------------------------------------------------------------------------------------------------------------------------------------------------------------------------------------------------------------------------------------------------------------------------------------------------------------------------------------------------------------------------------------------------------------------------------------------------------------------------------------------------------------------------------------|-------------------------|
|        |                     | <p>Word] OR PFP[Text Word] OR tendinitis[Text Word] OR cervical[Text Word] OR jaw[Text Word] OR limb[Text Word] OR shoulder[Text Word] OR arm[Text Word] OR elbow[Text Word] OR wrist[Text Word] OR carpal[Text Word] OR hand[Text Word] OR finger[Text Word] OR collar[Text Word] OR vertebral[Text Word] OR lumbar[Text Word] OR back[Text Word] OR backache[Text Word] OR back pain[Text Word] OR headache[Text Word] OR hip[Text Word] OR knee[Text Word] OR patella*[Text Word] OR patellofemoral[Text Word] OR retropatellar[Text Word] OR leg[Text Word] OR ankle[Text Word] OR foot[Text Word] OR heel[Text Word] OR arthralgia[Text Word] OR osteochondritis[Text Word] OR osgood[Text Word] OR growing pain*[Text Word] OR scheuermann[Text Word])))) OR ((backache[Text Word] OR headache[Text Word])) OR (((pain[Text Word] OR ache[Text Word])) AND (musculoskeletal[Text Word] OR back[Text Word] OR joint[Text Word] OR PFP[Text Word] OR tendinitis[Text Word] OR cervical[Text Word] OR jaw[Text Word] OR limb[Text Word] OR shoulder[Text Word] OR arm[Text Word] OR elbow[Text Word] OR wrist[Text Word] OR carpal[Text Word] OR hand[Text Word] OR finger[Text Word] OR collar[Text Word] OR vertebral[Text Word] OR lumbar[Text Word] OR hip[Text Word] OR knee[Text Word] OR patella*[Text Word] OR patellofemoral[Text Word] OR retropatellar[Text Word] OR leg[Text Word] OR ankle[Text Word] OR foot[Text Word] OR heel[Text Word] OR arthralgia[Text Word] OR osteochondritis[Text Word] OR osgood[Text Word] OR growing pain*[Text Word] OR scheuermann[Text Word])))) AND (((juvenile[Text Word] OR adolescen*[Text Word] OR preadolescence[Text Word] OR Preadolescent[Text Word] OR preschool[Text Word] OR child[Text Word] OR children[Text Word] OR prepubertal[Text Word] OR kids[Text Word] OR paediatric[Text Word] OR pediatric[Text Word] OR youth[Text Word] OR young[Text Word] OR childhood[Text Word] OR schoolchild*[Text Word] OR teenager[Text Word])))) OR (((("Adolescent"[Mesh]) OR "Child"[Mesh]) OR "Infant"[Mesh])))) AND ((predict*[Text Word] OR long term[Text Word] OR Follow-up[Text Word] OR Prospective[Text Word] OR cohort[Text Word] OR cluster[Text Word] OR prognosis[Text Word] OR prognostic[Text Word] OR Mediator*[Text Word] OR treatment effect modifier*[Text Word] OR longitudinal*[Text Word]))</p> |                         |
| #42    | <a href="#">Add</a> | <p>Search (predict*[Text Word] OR long term[Text Word] OR Follow-up[Text Word] OR Prospective[Text Word] OR cohort[Text Word] OR cluster[Text Word] OR prognosis[Text Word] OR prognostic[Text Word] OR Mediator*[Text Word] OR treatment effect modifier*[Text Word] OR longitudinal*[Text Word])</p>                                                                                                                                                                                                                                                                                                                                                                                                                                                                                                                                                                                                                                                                                                                                                                                                                                                                                                                                                                                                                                                                                                                                                                                                                                                                                                                                                                                                                                                                                                                                                                                                                                                                                                                                                                                                                                                                                                                                                                                                                                                                      | <a href="#">4564026</a> |
| #41    | <a href="#">Add</a> | <p>Search (((((((((((("Back Pain"[Mesh:NoExp]) OR "Musculoskeletal Pain"[Mesh]) OR "Abdominal Pain"[Mesh:NoExp]) OR "Low Back Pain"[Mesh]) OR "Arthralgia"[Mesh]) OR "Chest Pain"[Mesh]) OR "Facial Pain"[Mesh:NoExp]) OR "Flank Pain"[Mesh]) OR "Metatarsalgia"[Mesh:NoExp]) OR "Neck Pain"[Mesh])) OR (((("Acute Pain"[Mesh]) OR "Chronic Pain"[Mesh]) OR "Breakthrough Pain"[Mesh]) OR "Pain, Intractable"[Mesh]) OR "Pain, Referred"[Mesh])) AND ((musculoskeletal[Text Word] OR back pain[Text Word] OR backache[Text Word] OR headache[Text Word] OR joint[Text Word] OR PFP[Text Word] OR tendinitis[Text Word] OR cervical[Text Word] OR jaw[Text Word] OR limb[Text Word] OR shoulder[Text Word] OR arm[Text Word] OR elbow[Text Word] OR wrist[Text Word] OR carpal[Text Word] OR hand[Text Word] OR finger[Text Word] OR collar[Text Word] OR vertebral[Text Word] OR lumbar[Text Word] OR back[Text Word] OR backache[Text Word] OR back pain[Text Word] OR headache[Text Word] OR hip[Text Word] OR knee[Text Word] OR patella*[Text Word] OR patellofemoral[Text Word] OR retropatellar[Text Word] OR leg[Text Word] OR ankle[Text Word] OR foot[Text Word] OR heel[Text Word] OR arthralgia[Text Word] OR osteochondritis[Text Word] OR osgood[Text Word] OR growing pain*[Text Word] OR scheuermann[Text Word])))) OR ((backache[Text Word] OR headache[Text Word])) OR (((pain[Text Word] OR ache[Text Word])) AND (musculoskeletal[Text Word] OR back[Text Word] OR joint[Text Word] OR PFP[Text Word] OR tendinitis[Text Word] OR cervical[Text Word] OR jaw[Text Word] OR limb[Text Word] OR shoulder[Text Word]</p>                                                                                                                                                                                                                                                                                                                                                                                                                                                                                                                                                                                                                                                                                                                                    | <a href="#">83258</a>   |

| Search              | Add to builder      | Query                                                                                                                                                                                                                                                                                                                                                                                                                                                                                                                                                                                                                                                                                                                                                                                                                                                                                                                                                                                                                                                                                                                                                                                                                                                                                                                                                                                                                                                                                                                                                                                                                                                                                                                                                                                                                                                                                                                                                                                                                                                                                                                                                               | Items found             |
|---------------------|---------------------|---------------------------------------------------------------------------------------------------------------------------------------------------------------------------------------------------------------------------------------------------------------------------------------------------------------------------------------------------------------------------------------------------------------------------------------------------------------------------------------------------------------------------------------------------------------------------------------------------------------------------------------------------------------------------------------------------------------------------------------------------------------------------------------------------------------------------------------------------------------------------------------------------------------------------------------------------------------------------------------------------------------------------------------------------------------------------------------------------------------------------------------------------------------------------------------------------------------------------------------------------------------------------------------------------------------------------------------------------------------------------------------------------------------------------------------------------------------------------------------------------------------------------------------------------------------------------------------------------------------------------------------------------------------------------------------------------------------------------------------------------------------------------------------------------------------------------------------------------------------------------------------------------------------------------------------------------------------------------------------------------------------------------------------------------------------------------------------------------------------------------------------------------------------------|-------------------------|
|                     |                     | Word] OR arm[Text Word] OR elbow[Text Word] OR wrist[Text Word] OR carpal[Text Word] OR hand[Text Word] OR finger[Text Word] OR collar[Text Word] OR vertebral[Text Word] OR lumbar[Text Word] OR hip[Text Word] OR knee[Text Word] OR patella*[Text Word] OR patellofemoral[Text Word] OR retropatellar[Text Word] OR leg[Text Word] OR ankle[Text Word] OR foot[Text Word] OR heel[Text Word] OR arthralgia[Text Word] OR osteochondritis[Text Word] OR osgood[Text Word] OR growing pain*[Text Word] OR scheuermann[Text Word])))) AND (((juvenile[Text Word] OR adolescent*[Text Word] OR preadolescence[Text Word] OR Preadolescent[Text Word] OR preschool[Text Word] OR child[Text Word] OR children[Text Word] OR prepubertal[Text Word] OR kids[Text Word] OR paediatric[Text Word] OR pediatric[Text Word] OR youth[Text Word] OR young[Text Word] OR childhood[Text Word] OR schoolchild*[Text Word] OR teenager[Text Word])))) OR (((("Adolescent"[Mesh]) OR "Child"[Mesh]) OR "Infant"[Mesh]))                                                                                                                                                                                                                                                                                                                                                                                                                                                                                                                                                                                                                                                                                                                                                                                                                                                                                                                                                                                                                                                                                                                                                         |                         |
| <a href="#">#40</a> | <a href="#">Add</a> | Search (((juvenile[Text Word] OR adolescent*[Text Word] OR preadolescence[Text Word] OR Preadolescent[Text Word] OR preschool[Text Word] OR child[Text Word] OR children[Text Word] OR prepubertal[Text Word] OR kids[Text Word] OR paediatric[Text Word] OR pediatric[Text Word] OR youth[Text Word] OR young[Text Word] OR childhood[Text Word] OR schoolchild*[Text Word] OR teenager[Text Word])))) OR (((("Adolescent"[Mesh]) OR "Child"[Mesh]) OR "Infant"[Mesh]))                                                                                                                                                                                                                                                                                                                                                                                                                                                                                                                                                                                                                                                                                                                                                                                                                                                                                                                                                                                                                                                                                                                                                                                                                                                                                                                                                                                                                                                                                                                                                                                                                                                                                            | <a href="#">4321275</a> |
| <a href="#">#39</a> | <a href="#">Add</a> | Search (juvenile[Text Word] OR adolescen*[Text Word] OR preadolescence[Text Word] OR Preadolescent[Text Word] OR preschool[Text Word] OR child[Text Word] OR children[Text Word] OR prepubertal[Text Word] OR kids[Text Word] OR paediatric[Text Word] OR pediatric[Text Word] OR youth[Text Word] OR young[Text Word] OR childhood[Text Word] OR schoolchild*[Text Word] OR teenager[Text Word])                                                                                                                                                                                                                                                                                                                                                                                                                                                                                                                                                                                                                                                                                                                                                                                                                                                                                                                                                                                                                                                                                                                                                                                                                                                                                                                                                                                                                                                                                                                                                                                                                                                                                                                                                                   | <a href="#">3920419</a> |
| <a href="#">#38</a> | <a href="#">Add</a> | Search (("Adolescent"[Mesh]) OR "Child"[Mesh]) OR "Infant"[Mesh]                                                                                                                                                                                                                                                                                                                                                                                                                                                                                                                                                                                                                                                                                                                                                                                                                                                                                                                                                                                                                                                                                                                                                                                                                                                                                                                                                                                                                                                                                                                                                                                                                                                                                                                                                                                                                                                                                                                                                                                                                                                                                                    | <a href="#">3366738</a> |
| <a href="#">#31</a> | <a href="#">Add</a> | Search (((((((((((("Back Pain"[Mesh:NoExp]) OR "Musculoskeletal Pain"[Mesh]) OR "Abdominal Pain"[Mesh:NoExp]) OR "Low Back Pain"[Mesh]) OR "Arthralgia"[Mesh]) OR "Chest Pain"[Mesh]) OR "Facial Pain"[Mesh:NoExp]) OR "Flank Pain"[Mesh]) OR "Metatarsalgia"[Mesh:NoExp]) OR "Neck Pain"[Mesh])) OR (((((((("Acute Pain"[Mesh]) OR "Chronic Pain"[Mesh]) OR "Breakthrough Pain"[Mesh]) OR "Pain, Intractable"[Mesh]) OR "Pain, Referred"[Mesh])) AND ((musculoskeletal[Text Word] OR back pain[Text Word] OR backache[Text Word] OR headache[Text Word] OR joint[Text Word] OR PFP[Text Word] OR tendinitis[Text Word] OR cervical[Text Word] OR jaw[Text Word] OR limb[Text Word] OR shoulder[Text Word] OR arm[Text Word] OR elbow[Text Word] OR wrist[Text Word] OR carpal[Text Word] OR hand[Text Word] OR finger[Text Word] OR collar[Text Word] OR vertebral[Text Word] OR lumbar[Text Word] OR back[Text Word] OR backache[Text Word] OR back pain[Text Word] OR headache[Text Word] OR hip[Text Word] OR knee[Text Word] OR patella*[Text Word] OR patellofemoral[Text Word] OR retropatellar[Text Word] OR leg[Text Word] OR ankle[Text Word] OR foot[Text Word] OR heel[Text Word] OR arthralgia[Text Word] OR osteochondritis[Text Word] OR osgood[Text Word] OR growing pain*[Text Word] OR scheuermann[Text Word])))) OR ((backache[Text Word] OR headache[Text Word])) OR (((pain[Text Word] OR ache[Text Word])) AND (musculoskeletal[Text Word] OR back[Text Word] OR joint[Text Word] OR PFP[Text Word] OR tendinitis[Text Word] OR cervical[Text Word] OR jaw[Text Word] OR limb[Text Word] OR shoulder[Text Word] OR arm[Text Word] OR elbow[Text Word] OR wrist[Text Word] OR carpal[Text Word] OR hand[Text Word] OR finger[Text Word] OR collar[Text Word] OR vertebral[Text Word] OR lumbar[Text Word] OR hip[Text Word] OR knee[Text Word] OR patella*[Text Word] OR patellofemoral[Text Word] OR retropatellar[Text Word] OR leg[Text Word] OR ankle[Text Word] OR foot[Text Word] OR heel[Text Word] OR arthralgia[Text Word] OR osteochondritis[Text Word] OR osgood[Text Word] OR growing pain*[Text Word] OR scheuermann[Text Word])) | <a href="#">380268</a>  |

| Search              | Add to builder      | Query                                                                                                                                                                                                                                                                                                                                                                                                                                                                                                                                                                                                                                                                                                                                                                                                                                                                                                                                                                                                                           | Items found             |
|---------------------|---------------------|---------------------------------------------------------------------------------------------------------------------------------------------------------------------------------------------------------------------------------------------------------------------------------------------------------------------------------------------------------------------------------------------------------------------------------------------------------------------------------------------------------------------------------------------------------------------------------------------------------------------------------------------------------------------------------------------------------------------------------------------------------------------------------------------------------------------------------------------------------------------------------------------------------------------------------------------------------------------------------------------------------------------------------|-------------------------|
| <a href="#">#30</a> | <a href="#">Add</a> | Search ((pain[Text Word] OR ache[Text Word])) AND (musculoskeletal[Text Word] OR back[Text Word] OR joint[Text Word] OR PFP[Text Word] OR tendinitis[Text Word] OR cervical[Text Word] OR jaw[Text Word] OR limb[Text Word] OR shoulder[Text Word] OR arm[Text Word] OR elbow[Text Word] OR wrist[Text Word] OR carpal[Text Word] OR hand[Text Word] OR finger[Text Word] OR collar[Text Word] OR vertebral[Text Word] OR lumbar[Text Word] OR hip[Text Word] OR knee[Text Word] OR patella*[Text Word] OR patellofemoral[Text Word] OR retropatellar[Text Word] OR leg[Text Word] OR ankle[Text Word] OR foot[Text Word] OR heel[Text Word] OR arthralgia[Text Word] OR osteochondritis[Text Word] OR osgood[Text Word] OR growing pain*[Text Word] OR scheuermann[Text Word])                                                                                                                                                                                                                                                 | <a href="#">231899</a>  |
| <a href="#">#29</a> | <a href="#">Add</a> | Search (backache[Text Word] OR headache[Text Word])                                                                                                                                                                                                                                                                                                                                                                                                                                                                                                                                                                                                                                                                                                                                                                                                                                                                                                                                                                             | <a href="#">81147</a>   |
| <a href="#">#28</a> | <a href="#">Add</a> | Search (((("Acute Pain"[Mesh]) OR "Chronic Pain"[Mesh]) OR "Breakthrough Pain"[Mesh]) OR "Pain, Intractable"[Mesh]) OR "Pain, Referred"[Mesh])) AND ((musculoskeletal[Text Word] OR back pain[Text Word] OR backache[Text Word] OR headache[Text Word] OR joint[Text Word] OR PFP[Text Word] OR tendinitis[Text Word] OR cervical[Text Word] OR jaw[Text Word] OR limb[Text Word] OR shoulder[Text Word] OR arm[Text Word] OR elbow[Text Word] OR wrist[Text Word] OR carpal[Text Word] OR hand[Text Word] OR finger[Text Word] OR collar[Text Word] OR vertebral[Text Word] OR lumbar[Text Word] OR back[Text Word] OR backache[Text Word] OR back pain[Text Word] OR headache[Text Word] OR hip[Text Word] OR knee[Text Word] OR patella*[Text Word] OR patellofemoral[Text Word] OR retropatellar[Text Word] OR leg[Text Word] OR ankle[Text Word] OR foot[Text Word] OR heel[Text Word] OR arthralgia[Text Word] OR osteochondritis[Text Word] OR osgood[Text Word] OR growing pain*[Text Word] OR scheuermann[Text Word])) | <a href="#">5826</a>    |
| <a href="#">#27</a> | <a href="#">Add</a> | Search (musculoskeletal[Text Word] OR back pain[Text Word] OR backache[Text Word] OR headache[Text Word] OR joint[Text Word] OR PFP[Text Word] OR tendinitis[Text Word] OR cervical[Text Word] OR jaw[Text Word] OR limb[Text Word] OR shoulder[Text Word] OR arm[Text Word] OR elbow[Text Word] OR wrist[Text Word] OR carpal[Text Word] OR hand[Text Word] OR finger[Text Word] OR collar[Text Word] OR vertebral[Text Word] OR lumbar[Text Word] OR back[Text Word] OR backache[Text Word] OR back pain[Text Word] OR headache[Text Word] OR hip[Text Word] OR knee[Text Word] OR patella*[Text Word] OR patellofemoral[Text Word] OR retropatellar[Text Word] OR leg[Text Word] OR ankle[Text Word] OR foot[Text Word] OR heel[Text Word] OR arthralgia[Text Word] OR osteochondritis[Text Word] OR osgood[Text Word] OR growing pain*[Text Word] OR scheuermann[Text Word])                                                                                                                                                | <a href="#">2077798</a> |
| <a href="#">#26</a> | <a href="#">Add</a> | Search (((("Acute Pain"[Mesh]) OR "Chronic Pain"[Mesh]) OR "Breakthrough Pain"[Mesh]) OR "Pain, Intractable"[Mesh]) OR "Pain, Referred"[Mesh])                                                                                                                                                                                                                                                                                                                                                                                                                                                                                                                                                                                                                                                                                                                                                                                                                                                                                  | <a href="#">19040</a>   |
| <a href="#">#19</a> | <a href="#">Add</a> | Search (((((((("Back Pain"[Mesh:NoExp]) OR "Musculoskeletal Pain"[Mesh]) OR "Abdominal Pain"[Mesh:NoExp]) OR "Low Back Pain"[Mesh]) OR "Arthralgia"[Mesh]) OR "Chest Pain"[Mesh]) OR "Facial Pain"[Mesh:NoExp]) OR "Flank Pain"[Mesh]) OR "Metatarsalgia"[Mesh:NoExp]) OR "Neck Pain"[Mesh])                                                                                                                                                                                                                                                                                                                                                                                                                                                                                                                                                                                                                                                                                                                                    | <a href="#">133062</a>  |

| No. | Query                                                                                                                                                                                                                                                                                                                                                                                                                                                                                                                                                                                                                                                                                                                           | Results |
|-----|---------------------------------------------------------------------------------------------------------------------------------------------------------------------------------------------------------------------------------------------------------------------------------------------------------------------------------------------------------------------------------------------------------------------------------------------------------------------------------------------------------------------------------------------------------------------------------------------------------------------------------------------------------------------------------------------------------------------------------|---------|
| #29 | #28 AND [31-5-2017]/sd                                                                                                                                                                                                                                                                                                                                                                                                                                                                                                                                                                                                                                                                                                          | 3306    |
| #28 | #24 NOT #27                                                                                                                                                                                                                                                                                                                                                                                                                                                                                                                                                                                                                                                                                                                     | 25542   |
| #27 | #25 OR #26                                                                                                                                                                                                                                                                                                                                                                                                                                                                                                                                                                                                                                                                                                                      | 18603   |
| #26 | #24 AND ('case report'/de OR 'systematic review'/de OR 'meta analysis'/de)                                                                                                                                                                                                                                                                                                                                                                                                                                                                                                                                                                                                                                                      | 11517   |
| #25 | #24 AND ('Conference Abstract'/it OR 'Editorial'/it OR 'Letter'/it)                                                                                                                                                                                                                                                                                                                                                                                                                                                                                                                                                                                                                                                             | 9403    |
| #24 | #22 AND #23                                                                                                                                                                                                                                                                                                                                                                                                                                                                                                                                                                                                                                                                                                                     | 44145   |
| #23 | predict* OR 'long term' OR 'follow-up' OR prospective OR cohort OR cluster OR prognosis OR prognostic OR mediator* OR 'treatment effect modifier*' OR longitudinal*                                                                                                                                                                                                                                                                                                                                                                                                                                                                                                                                                             | 6151238 |
| #22 | #19 OR #21                                                                                                                                                                                                                                                                                                                                                                                                                                                                                                                                                                                                                                                                                                                      | 121885  |
| #21 | #18 AND #20                                                                                                                                                                                                                                                                                                                                                                                                                                                                                                                                                                                                                                                                                                                     | 82516   |
| #20 | juvenile:ti,ab,kw OR adolescen*:ti,ab,kw OR preadolescence:ti,ab,kw OR preadolescent:ti,ab,kw OR preschool:ti,ab,kw OR child:ti,ab,kw OR children:ti,ab,kw OR prepubertal:ti,ab,kw OR kids:ti,ab,kw OR paediatric:ti,ab,kw OR pediatric:ti,ab,kw OR youth:ti,ab,kw OR young:ti,ab,kw OR childhood:ti,ab,kw OR schoolchild*:ti,ab,kw OR teenager:ti,ab,kw                                                                                                                                                                                                                                                                                                                                                                        | 2498081 |
| #19 | #18 AND ([adolescent]/lim OR [child]/lim OR [infant]/lim OR [newborn]/lim OR [preschool]/lim OR [school]/lim)                                                                                                                                                                                                                                                                                                                                                                                                                                                                                                                                                                                                                   | 90443   |
| #18 | #8 OR #15 OR #16 OR #17                                                                                                                                                                                                                                                                                                                                                                                                                                                                                                                                                                                                                                                                                                         | 710948  |
| #17 | ((pain OR ache) NEAR/3 (musculoskeletal OR 'back pain' OR joint OR pfp OR tendinitis OR cervical OR jaw OR limb OR shoulder OR arm OR elbow OR wrist OR carpal OR hand OR finger OR collar OR vertebral OR lumbar OR back OR backache OR headache OR hip OR knee OR patella* OR patellofemoral OR retropatellar OR leg OR ankle OR foot OR heel OR arthralgia OR osteochondritis OR osgood OR 'growing pain*' OR scheuermann)):ti,ab,kw                                                                                                                                                                                                                                                                                         | 150092  |
| #16 | backache:ti,ab,kw,de OR headache:ti,ab,kw,de                                                                                                                                                                                                                                                                                                                                                                                                                                                                                                                                                                                                                                                                                    | 293040  |
| #15 | #13 AND #14                                                                                                                                                                                                                                                                                                                                                                                                                                                                                                                                                                                                                                                                                                                     | 17347   |
| #14 | musculoskeletal:ti,ab,kw OR 'back pain':ti,ab,kw OR joint:ti,ab,kw OR pfp:ti,ab,kw OR tendinitis:ti,ab,kw OR cervical:ti,ab,kw OR jaw:ti,ab,kw OR limb:ti,ab,kw OR shoulder:ti,ab,kw OR arm:ti,ab,kw OR elbow:ti,ab,kw OR wrist:ti,ab,kw OR carpal:ti,ab,kw OR hand:ti,ab,kw OR finger:ti,ab,kw OR collar:ti,ab,kw OR vertebral:ti,ab,kw OR lumbar:ti,ab,kw OR back:ti,ab,kw OR backache:ti,ab,kw OR headache:ti,ab,kw OR hip:ti,ab,kw OR knee:ti,ab,kw OR patella*:ti,ab,kw OR patellofemoral:ti,ab,kw OR retropatellar:ti,ab,kw OR leg:ti,ab,kw OR ankle:ti,ab,kw OR foot:ti,ab,kw OR heel:ti,ab,kw OR arthralgia:ti,ab,kw OR osteochondritis:ti,ab,kw OR osgood:ti,ab,kw OR 'growing pain*':ti,ab,kw OR scheuermann:ti,ab,kw | 2376662 |
| #13 | #9 OR #10 OR #11 OR #12                                                                                                                                                                                                                                                                                                                                                                                                                                                                                                                                                                                                                                                                                                         | 59894   |
| #12 | 'referred pain'/exp                                                                                                                                                                                                                                                                                                                                                                                                                                                                                                                                                                                                                                                                                                             | 1091    |
| #11 | 'intractable pain'/exp                                                                                                                                                                                                                                                                                                                                                                                                                                                                                                                                                                                                                                                                                                          | 4650    |
| #10 | 'breakthrough pain'/exp                                                                                                                                                                                                                                                                                                                                                                                                                                                                                                                                                                                                                                                                                                         | 1346    |
| #9  | 'chronic pain'/exp                                                                                                                                                                                                                                                                                                                                                                                                                                                                                                                                                                                                                                                                                                              | 53614   |
| #8  | #1 OR #2 OR #3 OR #4 OR #5 OR #6 OR #7                                                                                                                                                                                                                                                                                                                                                                                                                                                                                                                                                                                                                                                                                          | 628050  |
| #7  | 'metatarsalgia'/exp                                                                                                                                                                                                                                                                                                                                                                                                                                                                                                                                                                                                                                                                                                             | 1188    |
| #6  | 'arthralgia'/exp                                                                                                                                                                                                                                                                                                                                                                                                                                                                                                                                                                                                                                                                                                                | 54706   |
| #5  | 'thorax pain'/exp                                                                                                                                                                                                                                                                                                                                                                                                                                                                                                                                                                                                                                                                                                               | 79342   |
| #4  | 'flank pain'/exp                                                                                                                                                                                                                                                                                                                                                                                                                                                                                                                                                                                                                                                                                                                | 6334    |
| #3  | 'abdominal pain'/exp                                                                                                                                                                                                                                                                                                                                                                                                                                                                                                                                                                                                                                                                                                            | 148863  |
| #2  | 'headache and facial pain'/exp                                                                                                                                                                                                                                                                                                                                                                                                                                                                                                                                                                                                                                                                                                  | 284304  |
| #1  | 'musculoskeletal pain'/exp                                                                                                                                                                                                                                                                                                                                                                                                                                                                                                                                                                                                                                                                                                      | 136136  |



## CINAHL (EBSCONet) 01.06.2017-01.02.2019

| Search ID# | Search Terms                                                                                                                                                                                                                                                                                                                                                                                                                            | Search Options                                                                                                                                                                       | Results   |
|------------|-----------------------------------------------------------------------------------------------------------------------------------------------------------------------------------------------------------------------------------------------------------------------------------------------------------------------------------------------------------------------------------------------------------------------------------------|--------------------------------------------------------------------------------------------------------------------------------------------------------------------------------------|-----------|
| S19        | s16 not s17                                                                                                                                                                                                                                                                                                                                                                                                                             | Limiters - Published Date: 20170601-20191231<br>Search modes - Boolean/Phrase                                                                                                        | 971       |
| S18        | s16 not s17                                                                                                                                                                                                                                                                                                                                                                                                                             | Search modes - Boolean/Phrase                                                                                                                                                        | 7,109     |
| S17        | PT (Systematic Review or Meta Analysis)                                                                                                                                                                                                                                                                                                                                                                                                 | Search modes - Boolean/Phrase                                                                                                                                                        | 87,387    |
| S16        | S14 AND S15                                                                                                                                                                                                                                                                                                                                                                                                                             | Search modes - Boolean/Phrase                                                                                                                                                        | 7,276     |
| S15        | (predict* or long term or Follow-up or Prospective or cohort or cluster or prognosis or prognostic or Mediator* or treatment effect modifier* or longitudinal*)                                                                                                                                                                                                                                                                         | Search modes - Boolean/Phrase                                                                                                                                                        | 1,025,399 |
| S14        | S11 OR S13                                                                                                                                                                                                                                                                                                                                                                                                                              | Search modes - Boolean/Phrase                                                                                                                                                        | 21,414    |
| S13        | S10 AND S12                                                                                                                                                                                                                                                                                                                                                                                                                             | Search modes - Boolean/Phrase                                                                                                                                                        | 21,266    |
| S12        | (juvenile or adolescen* or preadolescence or Preadolescent or preschool or child or children or prepubertal or kids or paediatric or pediatric or youth or young or childhood or schoolchild* or teenager)                                                                                                                                                                                                                              | Search modes - Boolean/Phrase                                                                                                                                                        | 1,048,327 |
| S11        | S1 OR S7 OR S8 OR S9                                                                                                                                                                                                                                                                                                                                                                                                                    | Limiters - Age Groups: Infant, Newborn: birth-1 month, Infant: 1-23 months, Child, Preschool: 2-5 years, Child: 6-12 years, Adolescent: 13-18 years<br>Search modes - Boolean/Phrase | 15,463    |
| S10        | S1 OR S7 OR S8 OR S9                                                                                                                                                                                                                                                                                                                                                                                                                    | Search modes - Boolean/Phrase                                                                                                                                                        | 107,547   |
| S9         | ((pain or ache) N3 (musculoskeletal or back or joint or PFP or tendinitis or cervical or jaw or limb or shoulder or arm or elbow or wrist or carpal or hand or finger or collar or vertebral or lumbar or hip or knee or patella* or patellofemoral or retropatellar or leg or ankle or foot or heel or arthralgia or osteochondritis or osgood or growing pain* or scheuermann))                                                       | Search modes - Boolean/Phrase                                                                                                                                                        | 61,789    |
| S8         | backache or headache                                                                                                                                                                                                                                                                                                                                                                                                                    | Search modes - Boolean/Phrase                                                                                                                                                        | 26,017    |
| S7         | S5 AND S6                                                                                                                                                                                                                                                                                                                                                                                                                               | Search modes - Boolean/Phrase                                                                                                                                                        | 7,112     |
| S6         | (musculoskeletal or back pain or backache or headache or joint or PFP or tendinitis or cervical or jaw or limb or shoulder or arm or elbow or wrist or carpal or hand or finger or collar or vertebral or lumbar or back or backache or back pain or headache or hip or knee or patella* or patellofemoral or retropatellar or leg or ankle or foot or heel or arthralgia or osteochondritis or osgood or growing pain* or scheuermann) | Search modes - Boolean/Phrase                                                                                                                                                        | 542,363   |
| S5         | S2 OR S3 OR S4                                                                                                                                                                                                                                                                                                                                                                                                                          | Search modes - Boolean/Phrase                                                                                                                                                        | 18,849    |
| S4         | (MH "Referred Pain")                                                                                                                                                                                                                                                                                                                                                                                                                    | Search modes - Boolean/Phrase                                                                                                                                                        | 406       |

|    |                                                                                                                                                                                                                                                                                                              |                               |        |
|----|--------------------------------------------------------------------------------------------------------------------------------------------------------------------------------------------------------------------------------------------------------------------------------------------------------------|-------------------------------|--------|
| S3 | (MH "Breakthrough Pain")                                                                                                                                                                                                                                                                                     | Search modes - Boolean/Phrase | 128    |
| S2 | (MH "Chronic Pain")                                                                                                                                                                                                                                                                                          | Search modes - Boolean/Phrase | 18,360 |
| S1 | (MH "Back Pain") OR (MH "Low Back Pain") OR (MH "Facial Pain") OR (MH "Headache") OR (MH "Knee Pain+") OR (MH "Metatarsalgia") OR (MH "Muscle Pain") OR (MH "Neck Pain") OR (MH "Arthralgia") OR (MH "Shoulder Pain") OR (MH "Chest Pain") OR (MH "Elbow Pain") OR (MH "Heel Pain") OR (MH "Abdominal Pain") | Search modes - Boolean/Phrase | 66,335 |

## Web of Science 2017-11.02.2019

| Set  | Results   |                                                                                                                                                                                                                                                                                                                                                                                                                                                      | Save History / Create Alert | Open Saved History | Edit Sets | Combine Sets<br><input type="radio"/> AND <input type="radio"/> OR<br>Combine | Delete Sets<br>Select All<br>Delete |
|------|-----------|------------------------------------------------------------------------------------------------------------------------------------------------------------------------------------------------------------------------------------------------------------------------------------------------------------------------------------------------------------------------------------------------------------------------------------------------------|-----------------------------|--------------------|-----------|-------------------------------------------------------------------------------|-------------------------------------|
| # 10 | 2,497     | #8 AND #7<br>Refined by: PUBLICATION YEARS: (2019 OR 2018 OR 2017)<br>Indexes=SCI-EXPANDED, SSCI, A&HCI, CPCI-S, CPCI-SSH, ESCI Timespan=All years                                                                                                                                                                                                                                                                                                   |                             |                    |           | <input type="checkbox"/>                                                      | <input type="checkbox"/>            |
| # 9  | 13,842    | #8 AND #7<br>Indexes=SCI-EXPANDED, SSCI, A&HCI, CPCI-S, CPCI-SSH, ESCI Timespan=All years                                                                                                                                                                                                                                                                                                                                                            |                             |                    | Edit      | <input type="checkbox"/>                                                      | <input type="checkbox"/>            |
| # 8  | 6,829,939 | TOPIC: (predict* or long term or Follow-up or Prospective or cohort or cluster or prognosis or prognostic or Mediator* or treatment effect modifier* or longitudinal*)<br>Indexes=SCI-EXPANDED, SSCI, A&HCI, CPCI-S, CPCI-SSH, ESCI Timespan=All years                                                                                                                                                                                               |                             |                    | Edit      | <input type="checkbox"/>                                                      | <input type="checkbox"/>            |
| # 7  | 34,837    | #6 AND #5<br>Indexes=SCI-EXPANDED, SSCI, A&HCI, CPCI-S, CPCI-SSH, ESCI Timespan=All years                                                                                                                                                                                                                                                                                                                                                            |                             |                    | Edit      | <input type="checkbox"/>                                                      | <input type="checkbox"/>            |
| # 6  | 2,803,621 | TOPIC: ((juvenile or adolescen* or preadolescence or Preadolescent or preschool or child or children or prepubertal or kids or paediatric or pediatric or youth or young or childhood or schoolchild* or teenager))<br>Indexes=SCI-EXPANDED, SSCI, A&HCI, CPCI-S, CPCI-SSH, ESCI Timespan=All years                                                                                                                                                  |                             |                    | Edit      | <input type="checkbox"/>                                                      | <input type="checkbox"/>            |
| # 5  | 282,070   | #4 OR #3<br>Indexes=SCI-EXPANDED, SSCI, A&HCI, CPCI-S, CPCI-SSH, ESCI Timespan=All years                                                                                                                                                                                                                                                                                                                                                             |                             |                    | Edit      | <input type="checkbox"/>                                                      | <input type="checkbox"/>            |
| # 4  | 74,839    | TOPIC: (backache or headache)<br>Indexes=SCI-EXPANDED, SSCI, A&HCI, CPCI-S, CPCI-SSH, ESCI Timespan=All years                                                                                                                                                                                                                                                                                                                                        |                             |                    | Edit      | <input type="checkbox"/>                                                      | <input type="checkbox"/>            |
| # 3  | 214,291   | #2 AND #1<br>Indexes=SCI-EXPANDED, SSCI, A&HCI, CPCI-S, CPCI-SSH, ESCI Timespan=All years                                                                                                                                                                                                                                                                                                                                                            |                             |                    | Edit      | <input type="checkbox"/>                                                      | <input type="checkbox"/>            |
| # 2  | 2,932,366 | TOPIC: (musculoskeletal or back or joint or PFP or tendinitis or cervical or jaw or limb or shoulder or arm or elbow or wrist or carpal or hand or finger or collar or vertebral or lumbar or hip or knee or patella* or patellofemoral or retropatellar or leg or ankle or foot or heel or arthralgia or osteochondritis or osgood or growing pain* or scheuermann)<br>Indexes=SCI-EXPANDED, SSCI, A&HCI, CPCI-S, CPCI-SSH, ESCI Timespan=All years |                             |                    | Edit      | <input type="checkbox"/>                                                      | <input type="checkbox"/>            |
| # 1  | 573,235   | TOPIC: (pain OR ache)<br>Indexes=SCI-EXPANDED, SSCI, A&HCI, CPCI-S, CPCI-SSH, ESCI Timespan=All years                                                                                                                                                                                                                                                                                                                                                |                             |                    | Edit      | <input type="checkbox"/>                                                      | <input type="checkbox"/>            |
|      |           |                                                                                                                                                                                                                                                                                                                                                                                                                                                      |                             |                    |           | <input type="radio"/> AND <input type="radio"/> OR<br>Combine                 | Select All<br>Delete                |

## PsycInfo 2017-11.02.2019

|   |                                                                                                                                                                                                                                                                                             |        |
|---|---------------------------------------------------------------------------------------------------------------------------------------------------------------------------------------------------------------------------------------------------------------------------------------------|--------|
| 1 | exp Musculoskeletal Disorders/                                                                                                                                                                                                                                                              | 16869  |
| 2 | headache/ or muscle contraction headache/                                                                                                                                                                                                                                                   | 7319   |
| 3 | myofascial pain/                                                                                                                                                                                                                                                                            | 329    |
| 4 | back pain/                                                                                                                                                                                                                                                                                  | 3655   |
| 5 | 1 or 2 or 3 or 4                                                                                                                                                                                                                                                                            | 27350  |
| 6 | chronic pain/                                                                                                                                                                                                                                                                               | 12511  |
| 7 | pain/                                                                                                                                                                                                                                                                                       | 23687  |
| 8 | 6 or 7                                                                                                                                                                                                                                                                                      | 35477  |
| 9 | (musculoskeletal or back pain or backache or headache or joint or PFP or tendinitis or cervical or jaw or limb or shoulder or arm or elbow or wrist or carpal or hand or finger or collar or vertebral or lumbar or back or backache or back pain or headache or hip or knee or patella* or | 238846 |

|    |                                                                                                                                                                                                                                                                                                                                                                                         |        |
|----|-----------------------------------------------------------------------------------------------------------------------------------------------------------------------------------------------------------------------------------------------------------------------------------------------------------------------------------------------------------------------------------------|--------|
|    | patellofemoral or retropatellar or leg or ankle or foot or heel or arthralgia or osteochondritis or osgood or growing pain* or scheuermann).mp.                                                                                                                                                                                                                                         |        |
| 10 | 8 and 9                                                                                                                                                                                                                                                                                                                                                                                 | 9902   |
| 11 | (backache or headache).mp.                                                                                                                                                                                                                                                                                                                                                              | 19554  |
| 12 | ((pain or ache) adj3 (musculoskeletal or back or joint or PFP or tendinitis or cervical or jaw or limb or shoulder or arm or elbow or wrist or carpal or hand or finger or collar or vertebral or lumbar or hip or knee or patella* or patellofemoral or retropatellar or leg or ankle or foot or heel or arthralgia or osteochondritis or osgood or growing pain* or scheuermann)).mp. | 10225  |
| 13 | 5 or 10 or 11 or 12                                                                                                                                                                                                                                                                                                                                                                     | 46619  |
| 14 | limit 13 to (100 childhood <birth to age 12 yrs> or 200 adolescence <age 13 to 17 yrs>)                                                                                                                                                                                                                                                                                                 | 5926   |
| 15 | (juvenile or adolescen* or preadolescence or Preadolescent or preschool or child or children or prepubertal or kids or paediatric or pediatric or youth or young or childhood or schoolchild* or teenager).mp.                                                                                                                                                                          | 961911 |
| 16 | 13 and 15                                                                                                                                                                                                                                                                                                                                                                               | 5867   |
| 17 | 14 or 16                                                                                                                                                                                                                                                                                                                                                                                | 8172   |
| 18 | (predict* or long term or Follow-up or Prospective or cohort or cluster or prognosis or prognostic or Mediator* or treatment effect modifier* or longitudinal*).mp.                                                                                                                                                                                                                     | 798327 |
| 19 | 17 and 18                                                                                                                                                                                                                                                                                                                                                                               | 2298   |
| 20 | ((systematic or method*) adj3 (review* or overview* or study or studies or search* or approach*)) or meta analy* or meta-analy* or metaanaly*).ti,ab,id.                                                                                                                                                                                                                                | 166163 |
| 21 | limit 19 to ("0830 systematic review" or 1200 meta analysis)                                                                                                                                                                                                                                                                                                                            | 45     |
| 22 | 20 or 21                                                                                                                                                                                                                                                                                                                                                                                | 166166 |
| 23 | 19 not 22                                                                                                                                                                                                                                                                                                                                                                               | 2130   |
| 24 | limit 23 to yr="2017 -Current"                                                                                                                                                                                                                                                                                                                                                          | 180    |

#### Cochrane Library juni 2017-11.02.2019

| ID | Search                                                                                                                                                                                                                                                                                                                                                                                                                                                          | Hits   |
|----|-----------------------------------------------------------------------------------------------------------------------------------------------------------------------------------------------------------------------------------------------------------------------------------------------------------------------------------------------------------------------------------------------------------------------------------------------------------------|--------|
| #1 | ((pain or ache) next/3 (musculoskeletal or back pain or backache or headache or joint or PFP or tendinitis or cervical or jaw or limb or shoulder or arm or elbow or wrist or carpal or hand or finger or collar or vertebral or lumbar or back or backache or back pain or headache or hip or knee or patella* or patellofemoral or retropatellar or leg or ankle or foot or heel or arthralgia or osteochondritis or osgood or growing pain* or scheuermann)) | 42928  |
| #2 | (backache or headache)                                                                                                                                                                                                                                                                                                                                                                                                                                          | 27829  |
| #3 | #1 OR #2                                                                                                                                                                                                                                                                                                                                                                                                                                                        | 63886  |
| #4 | (juvenile or adolescen* or preadolescence or Preadolescent or preschool or child or children or prepubertal or kids or paediatric or pediatric or youth or young or childhood or schoolchild* or teenager)                                                                                                                                                                                                                                                      | 270643 |
| #5 | #3 AND #4                                                                                                                                                                                                                                                                                                                                                                                                                                                       | 17122  |
| #6 | (predict* or long term or Follow-up or Prospective or cohort or cluster or prognosis or prognostic or Mediator* or treatment effect modifier* or longitudinal*)                                                                                                                                                                                                                                                                                                 | 453684 |
| #7 | #5 AND #6 with Cochrane Library publication date Between Jun 2017 and Feb 2019                                                                                                                                                                                                                                                                                                                                                                                  | 1186   |
